# Supplementary material for: Glaciological measurements and mass balances from Sperry Glacier, Montana, USA, years 2005–2015
Source: Copernicus journal article supplement (doi:10.5194/essd-9-47-2017), 2017-01-23
Supplement: Supplementary file 1 [file essd-9-47-2017-supplement.zip]

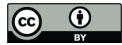

## *Supplement of*

# **Glaciological measurements and mass balances from Sperry Glacier, Montana, USA, years 2005–2015**

**Adam M. Clark et al.**

*Correspondence to:* Adam M. Clark (amclark@usgs.gov)

- [essd-9-47-2017-supplement-title-page.pdf](#)
- [ToESSD\\_zipfile\\_Supplement](#)
  - [BalanceMaps.pdf](#)
  - [Supplement\\_PointMeas\\_Tables.xlsx](#)
  - [Supplement\\_text\\_1st2pages.docx](#)

The copyright of individual parts of the supplement might differ from the CC-BY 3.0 licence.
