# Supplementary material for: Glaciological measurements and mass balances from Sperry Glacier, Montana, USA, years 2005–2015
Source: Copernicus journal article supplement (doi:10.5194/essd-9-47-2017), 2017-01-23
Supplement: Supplementary file 1 [file Supplement_PointMeas_Tables.xlsx]

## Sheet: 1
	Table S1: 2005 snow depths
	Coordinates: NAD83 UTM Zone 12N
	2005
	Point ID	Measurement Group	Date Measured	GPS	Easting	Northing	Elev (m)	Measured Depth (m)	Density (kg m-3)	bw
	A	stake site	2015-06-24	uncorrected	296747	5.38941e+06	2361.56	3.59	570.763	2.04904
	C	stake site	2015-06-24	uncorrected	296712	5.38917e+06	2446.98	4.2	575.082	2.41534
	D	stake site	2015-06-24	uncorrected	296682	5.3889e+06	2525	4.55	577.285	2.62665
	1	transect 1	2015-06-23	uncorrected	296547	5.38936e+06	2390.03	5.95	584.667	3.47877
	2	transect 1	2015-06-23	uncorrected	296600	5.38935e+06	2391.4	3.6	570.84	2.05502
	3	transect 1	2015-06-23	uncorrected	296653	5.38933e+06	2391.72	4.65	577.883	2.68716
	4	transect 1	2015-06-23	uncorrected	296705	5.38932e+06	2392.91	3.9	573.043	2.23487
	5	transect 1	2015-06-23	uncorrected	296757	5.3893e+06	2395.28	3.73	571.816	2.13287
	6	transect 1	2015-06-23	uncorrected	296809	5.38928e+06	2398.31	2.63	562.2	1.47859
	7	transect 1	2015-06-23	uncorrected	296864	5.38927e+06	2404.52	2.95	565.36	1.66781
	8	transect 1	2015-06-23	uncorrected	296918	5.38925e+06	2409.57	5.05	580.154	2.92978
	9	transect 1	2015-06-23	uncorrected	296974	5.38924e+06	2405.38	3.33	568.695	1.89375
	10	transect 1	2015-06-23	uncorrected	297026	5.38922e+06	2421.11	3.92	573.183	2.24688
	11	transect 1	2015-06-23	uncorrected	297079	5.38921e+06	2442.05	4.54	577.224	2.6206
	12	transect 1	2015-06-23	uncorrected	297133	5.3892e+06	2450.03	3.74	571.89	2.13887
	13	transect 1	2015-06-23	uncorrected	297184	5.38918e+06	2469.82	5.93	584.574	3.46653
	1	transect 2	2015-06-23	uncorrected	297236	5.3892e+06	2473.83	5.2	580.959	3.02099
	2	transect 2	2015-06-23	uncorrected	297240	5.38923e+06	2464.48	5.6	582.999	3.26479
	3	transect 2	2015-06-23	uncorrected	297244	5.38926e+06	2455.49	6.25	586.021	3.66263
	4	transect 2	2015-06-23	uncorrected	297248	5.38928e+06	2444.39	4.45	576.673	2.5662
	5	transect 2	2015-06-23	uncorrected	297252	5.38931e+06	2435.9	4.55	577.285	2.62665
	6	transect 2	2015-06-23	uncorrected	297256	5.38934e+06	2426.56	4.55	577.285	2.62665
	7	transect 2	2015-06-23	uncorrected	297264	5.38939e+06	2408.07	4.57	577.405	2.63874
	8	transect 2	2015-06-23	uncorrected	297271	5.38945e+06	2392.8	3.55	570.455	2.02512
	9	transect 2	2015-06-23	uncorrected	297277	5.3895e+06	2380.63	3.35	568.859	1.90568
	10	transect 2	2015-06-23	uncorrected	297283	5.38956e+06	2369.25	3.5	570.065	1.99523
	11	transect 2	2015-06-23	uncorrected	297288	5.38961e+06	2364.39	3.72	571.742	2.12688
	12	transect 2	2015-06-23	uncorrected	297293	5.38967e+06	2356.27	3.4	569.267	1.93551
	14	transect 2	2015-06-23	uncorrected	297302	5.38978e+06	2338.3	3.45	569.669	1.96536
	15	transect 2	2015-06-23	uncorrected	297307	5.38983e+06	2325.57	3.32	568.612	1.88779
	16	transect 2	2015-06-23	uncorrected	297310	5.38989e+06	2317.39	3.8	572.328	2.17485
	17	transect 2	2015-06-23	uncorrected	297282	5.38988e+06	2308.77	3.05	566.278	1.72715
	18	transect 2	2015-06-23	uncorrected	297229	5.38989e+06	2287.19	2.76	563.528	1.55534
	1	transect 3	2015-06-23	uncorrected	297229	5.38983e+06	2301.45	3.08	566.547	1.74496
	2	transect 3	2015-06-23	uncorrected	297227	5.38978e+06	2317.02	2.95	565.36	1.66781
	3	transect 3	2015-06-23	uncorrected	297186	5.38974e+06	2316.23	2.54	561.242	1.42556
	4	transect 3	2015-06-23	uncorrected	297141	5.38971e+06	2313.66	2.4	559.682	1.34324
	5	transect 3	2015-06-23	uncorrected	297097	5.38968e+06	2310.2	2.83	564.217	1.59674
	6	transect 3	2015-06-23	uncorrected	297049	5.38965e+06	2308.65	2.88	564.699	1.62633
	7	transect 3	2015-06-23	uncorrected	297002	5.38962e+06	2310.17	2.97	565.546	1.67967
	8	transect 3	2015-06-23	uncorrected	296953	5.3896e+06	2317.08	2.94	565.267	1.66188
	9	transect 3	2015-06-23	uncorrected	296904	5.38957e+06	2323.41	2.73	563.227	1.53761
	10	transect 3	2015-06-23	uncorrected	296854	5.38954e+06	2329.4	3.4	569.267	1.93551
	11	transect 3	2015-06-23	uncorrected	296804	5.38952e+06	2334.14	3.41	569.348	1.94148
	12	transect 3	2015-06-23	uncorrected	296755	5.38949e+06	2340.5	3.47	569.828	1.9773
	13	transect 3	2015-06-23	uncorrected	296706	5.38946e+06	2347.24	3.4	569.267	1.93551
	13.1	transect 3	2015-06-23	uncorrected	297297	5.38972e+06	2347.14	3.63	571.068	2.07298
	14	transect 3	2015-06-23	uncorrected	296657	5.38944e+06	2356.29	3.49	569.986	1.98925
	15	transect 3	2015-06-23	uncorrected	296608	5.38941e+06	2364.96	3.09	566.636	1.75091
	16	transect 3	2015-06-23	uncorrected	296556	5.3894e+06	2379.29	5.78	583.869	3.37477
	1	annual transect	2015-06-24	uncorrected	296723	5.38926e+06	2417.09	6	584.897	3.50938
	2	annual transect	2015-06-24	uncorrected	296716	5.38921e+06	2435.98	4.45	576.673	2.5662
	3	annual transect	2015-06-24	uncorrected	296712	5.38916e+06	2449.98	4.15	574.753	2.38522
	4	annual transect	2015-06-24	uncorrected	296703	5389107	2469.44	2.63	562.2	1.47859
	5	annual transect	2015-06-24	uncorrected	296697	5.38906e+06	2488.17	2.38	559.452	1.3315
	6	annual transect	2015-06-24	uncorrected	296691	5.389e+06	2503.71	2.7	562.923	1.51989
	7	annual transect	2015-06-24	uncorrected	296687	5.38895e+06	2518.07	3.88	572.901	2.22286
	8	annual transect	2015-06-24	uncorrected	296683	5.3889e+06	2533.48	4.79	578.699	2.77197
	9	annual transect	2015-06-24	uncorrected	296677	5.38885e+06	2567.4	5.81	584.012	3.39311
	10	annual transect	2015-06-24	uncorrected	296671	5.3888e+06	2570.07	4.15	574.753	2.38522
	13	annual transect	2015-06-24	uncorrected	296739	5.38936e+06	2380.37	3.62	570.992	2.06699
	14	annual transect	2015-06-24	uncorrected	296745	5.38941e+06	2365.44	3.15	567.165	1.78657
	15	annual transect	2015-06-24	uncorrected	296753	5.38946e+06	2350.43	2.85	564.411	1.60857
	16	annual transect	2015-06-24	uncorrected	296760	5.38951e+06	2335.99	3.55	570.455	2.02512
	17	annual transect	2015-06-24	uncorrected	296767	5.38957e+06	2326	3.08	566.547	1.74496
	18	annual transect	2015-06-24	uncorrected	296776	5.38962e+06	2314.41	2.69	562.821	1.51399
	19	annual transect	2015-06-24	uncorrected	296783	5.38967e+06	2297.68	2.5	560.805	1.40201
	1	transect 5	2015-06-24	uncorrected	296648	5.38885e+06	2552.65	6.8	588.342	4.00072
	2	transect 5	2015-06-24	uncorrected	296621	5.38885e+06	2551.62	7	589.14	4.12398
	3	transect 5	2015-06-24	uncorrected	296594	5.38885e+06	2554.49	6.85	588.543	4.03152
	4	transect 5	2015-06-24	uncorrected	296567	5.38885e+06	2556.76	6.15	585.577	3.6013
	5	transect 5	2015-06-24	uncorrected	296543	5388852	2567.02	5.43	582.15	3.16108
	6	transect 5	2015-06-24	uncorrected	296704	5.38885e+06	2548.57	6.6	587.52	3.87763
	7	transect 5	2015-06-24	uncorrected	296736	5388852	2552.38	7	589.14	4.12398
	8	transect 5	2015-06-24	uncorrected	296763	5.38885e+06	2552.45	5.46	582.302	3.17937
	9	transect 5	2015-06-24	uncorrected	296789	5388848	2554.1	5.21	581.012	3.02707
	10	transect 5	2015-06-24	uncorrected	296815	5.38885e+06	2556.45	5.73	583.63	3.3442
	11	transect 5	2015-06-24	uncorrected	296841	5388843	2561.9	7	589.14	4.12398
	12	transect 5	2015-06-24	uncorrected	296866	5.38884e+06	2564.81	6.47	586.973	3.79771
	lower	density pit	2015-06-25	uncorrected	296747	5.38941e+06	2360	3.1	566.725	1.75685
	upper	density pit	2015-06-26	uncorrected	296682	5.3889e+06	2522	4.55	577.285	2.62665
	bare ice	bare ice	2015-06-23	Corrected	296530	5.38918e+06	2458.57	0	0	0
						Count:	82	82	82	82
						Mean:	2417.06	4.09817	566.477	2.3607
						Median:	2396.79	3.675	571.405	2.09993
						StdDev:	87.0992	1.37937	63.8671	0.829589
						Min:	2287.19	0	0	0
						Max:	2570.07	7	589.14	4.12398
						Range:	282.885	7	589.14	4.12398

## Sheet: 2
	Table S2: 2006 snow depths
	Coordinates: NAD83 UTM Zone 12N
	2006
	Point ID	Measurement Group	Date Measured	GPS	Easting	Northing	Elev (m)	Measured Depth (m)	Depth on June 8 (m)	Density (kg m-3)	bw
	A	stake site	1900-06-26	corrected	296747	5.38941e+06	2360	4.07	4.64	577.824	2.6811
	C	stake site	1900-06-26	uncorrected	296712	5.38917e+06	2446.98	4.43	4.97	579.715	2.88118
	D	stake site	1900-06-28	uncorrected	296682	5.3889e+06	2525.02	5.55	6.15	585.577	3.6013
	h	stake site	1900-06-26	uncorrected	296853	5.38913e+06	2453.49	4.83	5.43	582.15	3.16108
	G	stake site	1900-06-26	uncorrected	297004	5.38914e+06	2466.95	3.88	4.48	576.858	2.58432
	i	stake site	1900-06-26	corrected	297262	5.38928e+06	2464.5	7	7.54	591.184	4.45753
	j	stake site	1900-06-26	corrected	297271	5.38945e+06	2407.24	4.1	4.64	577.824	2.6811
	k	stake site	1900-06-26	corrected	297098	5.38934e+06	2408.88	3.45	4.99	579.825	2.89333
	l	stake site	1900-06-27	corrected	297024	5.38945e+06	2364.49	3.5	4.07	574.217	2.33706
	m	stake site	1900-06-26	corrected	297235	5.38964e+06	2358.82	3.48	3.99	573.671	2.28895
	n	stake site	1900-06-26	corrected	297255	5.38989e+06	2308.93	3.8	4.33	575.921	2.49374
	o	stake site	1900-06-26	corrected	297004	5.38965e+06	2310.68	3.38	3.92	573.183	2.24688
	E	stake site	1900-06-26	corrected	296425	5.38918e+06	2447.37	2.82	3.39	569.186	1.92954
	p	stake site	1900-06-28	corrected	296525	5.38897e+06	2530.24	6.85	7.45	590.854	4.40186
	q	stake site	1900-06-28	corrected	296845	5.38896e+06	2532.5	4.15	4.75	578.469	2.74773
	2	transect 1	1900-06-23	corrected	296528	5.38927e+06	2428.34	3.4	3.85	572.688	2.20485
	3	transect 1	1900-06-23	corrected	296593	5.38927e+06	2431.72	3.5	3.95	573.393	2.2649
	4	transect 1	1900-06-23	corrected	296655	5.38926e+06	2432.09	3.5	3.95	573.393	2.2649
	5	transect 1	1900-06-23	corrected	296717	5.38924e+06	2431.52	3.24	3.69	571.52	2.10891
	6	transect 1	1900-06-23	corrected	296776	5.38923e+06	2431.38	5.95	6.4	586.673	3.75471
	7	transect 1	1900-06-23	corrected	296837	5.38922e+06	2435.25	3.5	3.95	573.393	2.2649
	8	transect 1	1900-06-23	corrected	296901	5.38921e+06	2437.86	5.35	5.8	583.964	3.38699
	9	transect 1	1900-06-23	corrected	296965	5.38921e+06	2441.1	5.7	6.15	585.577	3.6013
	11	transect 1	1900-06-23	uncorrected	297079	5.38921e+06	2442.05	5.74	6.19	585.755	3.62583
	1	transect 106	1900-06-08	corrected	297295	5.38994e+06	2317.14	6.02	6.02	584.989	3.52163
	2	transect 106	1900-06-08	corrected	297254	5.38989e+06	2308.97	4.71	4.71	578.236	2.72349
	3	transect 106	1900-06-08	corrected	297207	5.38984e+06	2306.85	4.67	4.67	578.001	2.69927
	4	transect 106	1900-06-08	corrected	297158	5.38979e+06	2304.12	3.86	3.86	572.759	2.21085
	5	transect 106	1900-06-08	corrected	297108	5.38974e+06	2308.03	3.54	3.54	570.378	2.01914
	6	transect 106	1900-06-08	corrected	297057	5.3897e+06	2310.94	3.46	3.46	569.748	1.97133
	7	transect 106	1900-06-08	corrected	297006	5.38965e+06	2310.5	4.29	4.29	575.666	2.46961
	8	transect 106	1900-06-08	corrected	296953	5.38961e+06	2322.59	4.38	4.38	576.237	2.52392
	9	transect 106	1900-06-08	corrected	296901	5.38957e+06	2335	4.02	4.02	573.877	2.30698
	10	transect 106	1900-06-08	corrected	296849	5.38953e+06	2346.21	4.52	4.52	577.103	2.6085
	11	transect 106	1900-06-08	corrected	296798	5.38948e+06	2363.81	4.57	4.57	577.405	2.63874
	12	transect 106	1900-06-08	corrected	296745	5.38944e+06	2369.26	4.37	4.37	576.174	2.51788
	13	transect 106	1900-06-08	corrected	296692	5.3894e+06	2383.71	5.28	5.28	581.38	3.06968
	14	transect 106	1900-06-08	corrected	296638	5.38936e+06	2399.57	5.57	5.57	582.851	3.24648
	15	transect 106	1900-06-08	corrected	296584	5.38931e+06	2415.79	3.23	3.23	567.856	1.83417
	16	transect 106	1900-06-08	corrected	296529	5.38927e+06	2427.33	4.36	4.36	576.111	2.51184
	17	transect 106	1900-06-08	corrected	296476	5.38923e+06	2439.5	0.82	0.82	530.129	0.434706
	17.5	transect 106	1900-06-08	corrected	296450	5.38921e+06	2441.04	2.44	2.44	560.137	1.36673
	18	transect 106	1900-06-08	corrected	296423	5.38919e+06	2446.12	3.25	3.25	568.025	1.84608
	18.5	transect 106	1900-06-08	corrected	296396	5.38917e+06	2454.15	3.89	3.89	572.972	2.22886
	1	transect 2	1900-06-08	corrected	297383	5.38964e+06	2381.82	5.73	5.73	583.63	3.3442
	1.5	transect 2	1900-06-08	corrected	297360	5.38962e+06	2377.76	6.1	6.1	585.352	3.57065
	2	transect 2	1900-06-08	corrected	297336	5.3896e+06	2381.08	5.24	5.24	581.17	3.04533
	2.5	transect 2	1900-06-08	corrected	297312	5.38957e+06	2385.52	5.37	5.37	581.845	3.12451
	3	transect 2	1900-06-08	corrected	297287	5.38955e+06	2387.99	4.99	4.99	579.825	2.89333
	4	transect 2	1900-06-08	corrected	297239	5.3895e+06	2387.36	4.17	4.17	574.885	2.39727
	5	transect 2	1900-06-08	corrected	297193	5.38945e+06	2389.06	3.84	3.84	572.616	2.19885
	6	transect 2	1900-06-08	corrected	297146	5.38939e+06	2399.3	4.52	4.52	577.103	2.6085
	7	transect 2	1900-06-08	corrected	297098	5.38934e+06	2410.54	4.06	4.06	574.149	2.33105
	8	transect 2	1900-06-08	corrected	297048	5.38929e+06	2430.43	3.78	3.78	572.183	2.16285
	9	transect 2	1900-06-08	corrected	297000	5.38924e+06	2438.66	2.96	2.96	565.453	1.67374
	10	transect 2	1900-06-10	corrected	296953	5.38919e+06	2448.63	4.46	4.52	577.103	2.6085
	11	transect 2	1900-06-10	corrected	296901	5.38914e+06	2462.74	4.46	4.52	577.103	2.6085
	12	transect 2	1900-06-10	corrected	296851	5.3891e+06	2476.78	4.05	4.11	574.486	2.36114
	13	transect 2	1900-06-10	corrected	296799	5.38905e+06	2496.94	5.01	5.07	580.263	2.94193
	14	transect 2	1900-06-10	corrected	296747	5.389e+06	2514.11	3.08	3.14	567.078	1.78062
	15	transect 2	1900-06-10	corrected	296694	5.38896e+06	2528.2	4.72	4.78	578.642	2.76591
	15.5	transect 2	1900-06-10	corrected	296669	5.38894e+06	2534.59	5.63	5.69	583.438	3.31976
	16	transect 2	1900-06-10	corrected	296643	5.38891e+06	2542.88	5.73	5.79	583.917	3.38088
	16.5	transect 2	1900-06-10	corrected	296619	5.38889e+06	2552.48	6.56	6.62	587.604	3.88994
	17	transect 2	1900-06-10	corrected	296594	5.38886e+06	2563.15	6.84	6.9	588.744	4.06233
	1	transect 3	1900-06-10	corrected	296499	5.38894e+06	2548.64	4.41	4.47	576.797	2.57828
	1.5	transect 3	1900-06-10	corrected	296524	5.38896e+06	2537.21	6.62	6.68	587.852	3.92685
	2	transect 3	1900-06-10	corrected	296545	5.38899e+06	2519.55	5.62	5.68	583.389	3.31365
	2.5	transect 3	1900-06-10	corrected	296571	5.38901e+06	2508.72	5.59	5.65	583.243	3.29533
	3	transect 3	1900-06-10	corrected	296596	5.38903e+06	2502.82	5.13	5.19	580.906	3.0149
	3.5	transect 3	1900-06-10	corrected	296622	5.38906e+06	2499.12	4.38	4.44	576.611	2.56015
	4	transect 3	1900-06-10	corrected	296646	5.38908e+06	2491.93	4.35	4.41	576.425	2.54203
	5	transect 3	1900-06-10	corrected	296693	5.38914e+06	2470.57	4.02	4.08	574.284	2.34308
	6	transect 3	1900-06-10	corrected	296741	5.38918e+06	2449.32	4.56	4.62	577.705	2.669
	7	transect 3	1900-06-10	corrected	296784	5.38923e+06	2429.05	4.6	4.66	577.942	2.69321
	8	transect 3	1900-06-10	corrected	296830	5.38929e+06	2414.49	5	5.06	580.208	2.93585
	9	transect 3	1900-06-10	corrected	296876	5.38934e+06	2399.8	3.38	3.44	569.589	1.95939
	10	transect 3	1900-06-10	corrected	296922	5.38939e+06	2382.11	4.4	4.46	576.735	2.57224
	11	transect 3	1900-06-10	corrected	296967	5.38944e+06	2365.68	4.41	4.47	576.797	2.57828
	12	transect 3	1900-06-23	corrected	297016	5.38948e+06	2356	3.58	4.03	573.945	2.313
	12.5	transect 3	1900-06-10	corrected	297015	5.38949e+06	2356.65	3.98	4.04	574.013	2.31901
	13	transect 3	1900-06-23	corrected	297070	5.38952e+06	2354.53	2.62	3.07	566.457	1.73902
	14	transect 3	1900-06-23	corrected	297122	5.38955e+06	2352.92	3.02	3.47	569.828	1.9773
	15	transect 3	1900-06-23	corrected	297173	5.38959e+06	2355.76	3.91	4.36	576.111	2.51184
	16	transect 3	1900-06-23	corrected	297222	5.38963e+06	2356.58	3.56	4.01	573.808	2.30097
	17	transect 3	1900-06-23	corrected	297271	5.38966e+06	2363.91	3.62	4.07	574.217	2.33706
	18	transect 3	1900-06-23	corrected	297320	5.3897e+06	2366.22	3.53	3.98	573.601	2.28293
	18.5	transect 3	1900-06-23	corrected	297344	5.38972e+06	2364.42	3.8	4.25	575.408	2.44548
	1	annual transect	1900-06-23	uncorrected	296723	5.38926e+06	2417.09	3.92	4.37	576.174	2.51788
	2	annual transect	1900-06-23	uncorrected	296716	5.38921e+06	2435.98	5	5.45	582.252	3.17327
	3	annual transect	1900-06-23	uncorrected	296712	5.38916e+06	2449.98	5.75	6.2	585.8	3.63196
	4	annual transect	1900-06-23	uncorrected	296703	5389107	2469.44	3.27	3.72	571.742	2.12688
	5	annual transect	1900-06-23	uncorrected	296697	5.38906e+06	2488.17	2.95	3.4	569.267	1.93551
	6	annual transect	1900-06-23	uncorrected	296691	5.389e+06	2503.71	3.62	4.07	574.217	2.33706
	7	annual transect	1900-06-23	uncorrected	296687	5.38895e+06	2518.07	4.95	5.4	581.998	3.14279
	8	annual transect	1900-06-23	uncorrected	296683	5.3889e+06	2533.48	6.05	6.5	587.1	3.81615
	9	annual transect	1900-06-23	uncorrected	296677	5.38885e+06	2567.4	7.1	7.55	591.221	4.46372
	10	annual transect	1900-06-23	uncorrected	296671	5.3888e+06	2570.07	7.4	7.85	592.293	4.6495
	11	annual transect	1900-06-23	uncorrected	296662	5.38878e+06	2582.28	9.03	9.48	597.485	5.66416
	13	annual transect	1900-06-23	uncorrected	296739	5.38936e+06	2380.37	5.12	5.57	582.851	3.24648
	14	annual transect	1900-06-23	uncorrected	296745	5.38941e+06	2365.44	4.15	4.6	577.586	2.65689
	15	annual transect	1900-06-23	uncorrected	296753	5.38946e+06	2350.43	3.78	4.23	575.278	2.43343
	16	annual transect	1900-06-23	uncorrected	296760	5.38951e+06	2335.99	3.8	4.25	575.408	2.44548
	17	annual transect	1900-06-23	uncorrected	296767	5.38957e+06	2326	4.35	4.8	578.757	2.77803
	18	annual transect	1900-06-23	uncorrected	296776	5.38962e+06	2314.41	3.87	4.32	575.857	2.4877
	19	annual transect	1900-06-23	uncorrected	296783	5.38967e+06	2297.68	2.25	2.7	562.923	1.51989
	1	transect 5	1900-06-23	uncorrected	296648	5.38885e+06	2552.65	6.9	7.35	590.482	4.34004
	3	transect 5	1900-06-23	uncorrected	296594	5.38885e+06	2554.49	8.8	9.25	596.809	5.52049
	lower	density pit	1900-06-10	uncorrected	296746	5389409	2361.56	4.64	4.7	578.177	2.71743
	bare ice	bare ice	2015-06-08	corrected	296530	5.38918e+06	2458.57	0	0	0	0
						Count:	110	na	110	110	110
						Mean:	2424.34	na	4.72882	572.264	2.74088
						Median:	2428.7	na	4.475	576.827	2.5813
						StdDev:	75.0137	na	1.38784	55.6587	0.839575
						Min:	2297.68	na	0	0	0
						Max:	2582.28	na	9.48	597.485	5.66416
						Range:	284.604	na	9.48	597.485	5.66416
	*Used the average of points 19-annual transect and 4-transect 106 for the winter balance in elevation band below 2300 m.

## Sheet: 3
	Table S3: 2007 snow depths
	Coordinates: NAD83 UTM Zone 12N
	2007
	Point ID	Measurement Group	Date Measured	GPS	Easting	Northing	Elev (m)	Measured Depth (m)	Depth on May 26 (m)	Density (kg m-3)	bw
	E	stake site	2015-06-22	corrected	296420	5389180	2445	2.25	3.33	467	1.55511
	r	stake site	2007-06-23	corrected	296518	5.38902e+06	2508.88	3.8	4.92	467	2.29764
	D	stake site	2007-06-23	corrected	296656	5.38889e+06	2546.89	5.31	6.43	467	3.00281
	q	stake site	2007-06-23	corrected	296854	5.38899e+06	2520.92	3.7	4.82	467	2.25094
	s	stake site	2007-06-23	corrected	297307	5.38947e+06	2407.11	4.83	5.95	467	2.77865
	t	stake site	2007-06-24	corrected	297234	5.38981e+06	2317.5	3.5	4.66	467	2.17622
	F	stake site	2007-06-24	corrected	297158	5.38955e+06	2353.51	4.2	5.36	467	2.50312
	C	stake site	2007-06-24	corrected	296753	5.38917e+06	2449.68	3.5	4.66	467	2.17622
	1	transect met	2007-06-24	corrected	297158	5.38955e+06	2353.51	4.15	5.37	467	2.50779
	2	transect met	2007-06-24	corrected	297116	5.38953e+06	2354.66	4	5.22	467	2.43774
	3	transect met	2007-06-24	corrected	297098	5.38952e+06	2356.56	3.85	5.07	467	2.36769
	4	transect met	2007-06-24	corrected	297058	5.38947e+06	2361.62	3.45	4.67	467	2.18089
	5	transect met	2007-06-24	corrected	297016	5.38942e+06	2369.26	3.36	4.58	467	2.13886
	6	transect met	2007-06-24	corrected	296975	5.38938e+06	2382.21	3.63	4.85	467	2.26495
	7	transect met	2007-06-24	corrected	296933	5.38933e+06	2399.02	4.35	5.57	467	2.60119
	8	transect met	2007-06-24	corrected	296891	5.38929e+06	2413.86	2.84	4.06	467	1.89602
	1	annual transect	2007-05-26	corrected	296712	5.38916e+06	2459.31	4.85	4.85	467	2.26495
	2	annual transect	2007-05-26	corrected	296703	5.38911e+06	2478.57	3.25	3.25	467	1.51775
	3	annual transect	2007-05-26	corrected	296696	5.38906e+06	2496.86	2.7	2.7	467	1.2609
	4	annual transect	2007-05-26	corrected	296691	5.38901e+06	2512.53	2.75	2.75	467	1.28425
	5	annual transect	2007-05-26	corrected	296688	5.38896e+06	2527.23	4.35	4.35	467	2.03145
	6	annual transect	2007-05-26	corrected	296683	5.3889e+06	2544.44	5.35	5.35	467	2.49845
	7	annual transect	2007-05-26	corrected	296678	5.38885e+06	2564.67	5.55	5.55	467	2.59185
	8	annual transect	2007-05-26	corrected	296718	5.38881e+06	2584.86	7.5	7.5	467	3.5025
	9	annual transect	2007-05-26	corrected	296807	5.38876e+06	2606.01	8.15	8.15	467	3.80605
	10	annual transect	2007-05-26	corrected	296805	5.38874e+06	2614.54	5.7	5.7	467	2.6619
	12	annual transect	2007-05-26	corrected	296776	5.38962e+06	2323.87	3.41	3.41	467	1.59247
	13	annual transect	2007-05-26	corrected	296767	5.38957e+06	2339.18	5.44	5.44	467	2.54048
	14	annual transect	2007-05-26	corrected	296760	5.38951e+06	2348.98	5.6	5.6	467	2.6152
	15	annual transect	2007-05-26	corrected	296754	5.38946e+06	2364.07	5.95	5.95	467	2.77865
	16(a)	annual transect	2007-05-26	corrected	296746	5.38942e+06	2373.63	3.85	3.85	467	1.79795
	16(b)	annual transect	2007-05-26	corrected	296741	5.38942e+06	2374.39	5	5	467	2.335
	17	annual transect	2007-05-26	corrected	296746	5.38941e+06	2378.62	5.8	5.8	467	2.7086
	18	annual transect	2007-05-26	corrected	296739	5.38936e+06	2394.43	5.8	5.8	467	2.7086
	20	annual transect	2007-05-26	corrected	296733	5.38931e+06	2410.93	5.5	5.5	467	2.5685
	21	annual transect	2007-05-26	corrected	296724	5.38926e+06	2426.67	6.55	6.55	467	3.05885
	22	annual transect	2007-05-26	corrected	296718	5.38921e+06	2442.78	5.5	5.5	467	2.5685
	lower	density pit	2007-05-16	uncorrected	296767	5.38943e+06	2357.98	5.29	4.87	467	2.27429
	1	additional point	2007-05-15	corrected	297256	5.38989e+06	2307.62	5.37	4.91	467	2.29297
	bare ice	bare ice	2015-05-26	corrected	296530	5.38918e+06	2458.57	0	0	0	0
						Count:	40	na	40	40	40
						Mean:	2430.77	na	4.94625	455.325	2.3099
						Median:	2409.02	na	5.035	467	2.35135
						StdDev:	85.1654	na	1.3699	73.8392	0.639744
						Min:	2307.62	na	0	0	0
						Max:	2614.54	na	8.15	467	3.80605
						Range:	306.913	na	8.15	467	3.80605

## Sheet: 4
	Table S4: 2008 snow depths
	Coordinates: NAD83 UTM Zone 12N
	2008
	Point ID	Measurement Group	Date Measured	GPS	Easting	Northing	Elev (m)	Measured Depth (m)	Depth on June 16 (m)	Density (kg m-3)	bw
	A	stake site	2015-07-09	uncorrected	296746	5.38941e+06	2365	4	5.85	463	2.70855
	B	stake site	2015-07-09	uncorrected	296993	5.38959e+06	2326.27	4.6	6.45	463	2.98635
	C	stake site	2015-07-10	uncorrected	296712	5.38917e+06	2454.17	5.1	6.75	463	3.12525
	D	stake site	2015-07-10	uncorrected	296682	5.3889e+06	2542.23	6.75	8.15	463	3.77345
	E	stake site	2015-07-10	uncorrected	296441	5.38917e+06	2449.44	2.85	4.55	463	2.10665
	F	stake site	2015-07-10	uncorrected	297158	5.38956e+06	2352.51	5.3	6.95	463	3.21785
	G	stake site	2015-07-10	uncorrected	297004	5.38914e+06	2475.38	5	6.45	463	2.98635
	4	annual transect	2008-06-16	uncorrected	296784	5.38967e+06	2300.16	4.6	4.6	463	2.1298
	5	annual transect	2008-06-16	uncorrected	296775	5.38962e+06	2321.65	4.92	4.92	463	2.27796
	8	annual transect	2008-06-16	uncorrected	296753	5.38949e+06	2353.87	5.86	5.86	463	2.71318
	lower	density pit	2008-06-16	corrected	296742	5.38942e+06	2375.32	6.5	6.5	463	3.0095
	bare ice	bare ice	2008-06-16	corrected	296530	5.38918e+06	2458.57	0	0	0	0
						Count:	12	na	12	12	12
						Mean:	2397.88	na	5.58583	424.417	2.58624
						Median:	2370.16	na	6.155	463	2.84977
						StdDev:	75.3341	na	2.04395	133.657	0.946349
						Min:	2300.16	na	0	0	0
						Max:	2542.23	na	8.15	463	3.77345
						Range:	242.07	na	8.15	463	3.77345

## Sheet: 5
	Table S5: 2009 snow depths
	Coordinates: NAD83 UTM Zone 12N
	2009
	Point ID	Measurement Group	Date Measured	GPS	Easting	Northing	Elev (m)	Measured Depth (m)	Depth on June 16 (m)	Density (kg m-3)	bw
	A	stake site	2009-06-25	corrected	296749	5.38941e+06	2376	3.3	3.55	570.455	2.02512
	B	stake site	2009-06-25	corrected	296994	5.38959e+06	2326	3.5	3.75	571.963	2.14486
	D	stake site	2009-06-25	corrected	296682	5.3889e+06	2542.78	6.35	6.6	587.52	3.87763
	E	stake site	2009-06-25	corrected	296453	5.38918e+06	2449	1.95	2.2	557.288	1.22603
	F	stake site	2009-06-25	corrected	297158	5.38955e+06	2352	3.75	4	573.739	2.29496
	G	stake site	2009-06-25	corrected	297004	5.38914e+06	2475.34	3.5	3.75	571.963	2.14486
	1	additional point	2009-06-25	corrected	296798	5.38947e+06	2359.74	3.1	3.35	568.859	1.90568
	2	additional point	2009-06-25	corrected	296744	5.38944e+06	2367.01	3.48	3.73	571.816	2.13287
	3	additional point	2009-06-25	corrected	296742	5.38918e+06	2449.74	3.43	3.68	571.445	2.10292
	4	additional point	2009-06-25	corrected	296693	5.38913e+06	2470.77	2.82	3.07	566.457	1.73902
	5	additional point	2009-06-25	corrected	296692	5.3894e+06	2382.22	4.27	4.52	577.103	2.6085
	1	transect A	2009-06-25	corrected	296401	5.38916e+06	2452.55	3.16	3.16	567.253	1.79252
	2	transect A	2009-06-16	corrected	296425	5.38919e+06	2444.2	2.57	2.57	561.565	1.44322
	3	transect A	2009-06-16	corrected	296450	5.38921e+06	2440.24	2.19	2.19	557.162	1.22019
	4	transect A	2009-06-16	corrected	296476	5.38923e+06	2436.95	0.15	0.15	483.383	0.0725075
	5	transect A	2009-06-16	corrected	296591	5.38927e+06	2427.85	3.66	3.66	571.295	2.09094
	6	transect A	2009-06-16	corrected	296628	5.38936e+06	2396.59	4.67	4.67	578.001	2.69927
	7	transect A	2009-06-16	corrected	296694	5.3894e+06	2381.11	4.57	4.57	577.405	2.63874
	8	transect A	2009-06-16	corrected	296745	5.38944e+06	2367.72	3.82	3.82	572.472	2.18684
	9	transect A	2009-06-16	corrected	296799	5.38947e+06	2357.87	3.37	3.37	569.023	1.91761
	10	transect A	2009-06-16	uncorrected	296851	5.38952e+06	2343.28	3.77	3.77	572.11	2.15685
	10.5	transect A	2009-06-16	uncorrected	296851	5.38952e+06	2343.28	3.77	3.85	572.688	2.20485
	11	transect A	2009-06-16	corrected	296902	5.38957e+06	2330.37	3.47	3.47	569.828	1.9773
	12	transect A	2009-06-16	uncorrected	296954	5.38961e+06	2317.54	3.71	3.71	571.668	2.12089
	12.5	transect A	2009-06-16	uncorrected	296954	5.38961e+06	2317.54	3.71	3.71	571.668	2.12089
	13	transect A	2009-06-17	corrected	297005	5.38965e+06	2308.93	5.77	5.77	583.822	3.36865
	14	transect A	2009-06-16	corrected	297067	5.38971e+06	2305.65	3.21	3.21	567.685	1.82227
	16	transect A	2009-06-16	corrected	297158	5.38979e+06	2305.68	3.4	3.4	569.267	1.93551
	17	transect A	2009-06-16	corrected	297208	5.38984e+06	2302.13	3.37	3.37	569.023	1.91761
	18	transect A	2009-06-16	corrected	297254	5.38989e+06	2305.05	3.35	3.35	568.859	1.90568
	19	transect A	2009-06-16	corrected	297282	5.38994e+06	2306.22	6.17	6.17	585.666	3.61356
	1	transect B	2009-06-16	corrected	297343	5.38973e+06	2364.02	5.23	5.23	581.118	3.03925
	2	transect B	2009-06-16	corrected	297317	5.38971e+06	2364.96	4.77	4.77	578.584	2.75985
	3	transect B	2009-06-16	corrected	297270	5.38967e+06	2362.01	4.85	4.85	579.042	2.80835
	4	transect B	2009-06-16	corrected	297223	5.38963e+06	2355.47	3.53	3.53	570.3	2.01316
	5	transect B	2009-06-16	uncorrected	297166	5389591	2397	3.71	3.71	571.668	2.12089
	7	transect B	2009-06-17	uncorrected	297068	5389519	2356	3.51	3.51	570.143	2.0012
	9	transect B	2009-06-17	uncorrected	296966	5389445	2398	3.8	3.8	572.328	2.17485
	11	transect B	2009-06-17	corrected	296873	5.38934e+06	2396.83	3.78	3.78	572.183	2.16285
	13	transect B	2009-06-17	corrected	296795	5.38922e+06	2430.65	3.92	3.92	573.183	2.24688
	14	transect B	2009-06-17	corrected	296745	5.38918e+06	2447.94	4.02	4.02	573.877	2.30698
	16	transect B	2009-06-17	corrected	296712	5.38914e+06	2462.74	4.82	4.82	578.871	2.79016
	17	transect B	2009-06-17	uncorrected	296698	5389124	2469	3.03	3.03	566.097	1.71527
	18	transect B	2009-06-17	corrected	296632	5.38905e+06	2498.69	3.12	3.12	566.902	1.76873
	19	transect B	2009-06-17	corrected	296600	5.38903e+06	2501.72	3.48	3.48	569.907	1.98328
	20	transect B	2009-06-17	corrected	296574	5.38901e+06	2507.25	4.55	4.55	577.285	2.62665
	21	transect B	2009-06-17	corrected	296544	5.38899e+06	2519.08	3.93	3.93	573.254	2.25289
	22	transect B	2009-06-17	corrected	296517	5.38896e+06	2533.46	4.75	4.75	578.469	2.74773
	1	transect C	2009-06-17	uncorrected	297382	5389645	2380	4.25	4.25	575.408	2.44548
	3	transect C	2009-06-17	uncorrected	297334	5389602	2383	2.28	2.28	558.27	1.27286
	5	transect C	2009-06-17	uncorrected	297287	5389548	2387	2.18	2.18	557.036	1.21434
	7	transect C	2009-06-17	uncorrected	297200	5389445	2392	3.89	3.89	572.972	2.22886
	9	transect C	2009-06-17	uncorrected	297095	5389352	2411	3.4	3.4	569.267	1.93551
	10	transect C	2009-06-17	uncorrected	297048	5389300	2422	4.27	4.27	575.537	2.45754
	12	transect C	2009-06-17	uncorrected	296945	5389209	2444	3.76	3.76	572.037	2.15086
	13	transect C	2009-06-17	uncorrected	296740	5389014	2516	4.1	4.1	574.419	2.35512
	1	transect D	2009-06-17	uncorrected	296592	5389355	2409	6.02	6.02	584.989	3.52163
	2	transect D	2009-06-17	uncorrected	296705	5389307	2420	4.63	4.63	577.764	2.67505
	3	transect D	2009-06-17	uncorrected	296862	5389272	2424	2.82	2.82	564.12	1.59082
	4	transect D	2009-06-17	uncorrected	296914	5389250	2432	5.73	5.73	583.63	3.3442
	5	transect D	2009-06-17	uncorrected	297023	5389220	2454	3.03	3.03	566.097	1.71527
	6	transect D	2009-06-17	uncorrected	297131	5389198	2476	6.73	6.73	588.057	3.95762
	7	transect D	2009-06-17	uncorrected	297184	5389181	2498	8.5	8.5	594.482	5.0531
	1	annual transect	2015-06-25	corrected	296783	5.38967e+06	2298.54	3.72	3.97	573.532	2.27692
	2	annual transect	2009-06-25	corrected	296775	5.38962e+06	2322.96	2.15	2.4	559.682	1.34324
	3	annual transect	2009-06-25	corrected	296766	5.38956e+06	2337.96	3.32	3.57	570.61	2.03708
	4	annual transect	2009-06-25	corrected	296760	5.38951e+06	2346.23	3.83	4.08	574.284	2.34308
	5	annual transect	2009-06-25	corrected	296753	5.38946e+06	2362.67	3.2	3.45	569.669	1.96536
	6	annual transect	2009-06-25	corrected	296745	5.3894e+06	2377.86	3.42	3.67	571.37	2.09693
	7	annual transect	2009-06-25	corrected	296739	5.38935e+06	2393.8	3.98	4.23	575.278	2.43343
	8	annual transect	2009-06-25	corrected	296733	5.38931e+06	2411.14	3.42	3.67	571.37	2.09693
	9	annual transect	2009-06-25	corrected	296723	5.38926e+06	2427.39	4.8	5.05	580.154	2.92978
	10	annual transect	2009-06-25	corrected	296716	5.38921e+06	2443.18	3.57	3.82	572.472	2.18684
	11	annual transect	2009-06-25	corrected	296703	5.38911e+06	2478.73	2.45	2.7	562.923	1.51989
	12	annual transect	2009-06-25	corrected	296697	5.38906e+06	2497.84	3.23	3.48	569.907	1.98328
	13	annual transect	2009-06-25	corrected	296692	5.38901e+06	2511.41	2.05	2.3	558.511	1.28457
	14	annual transect	2009-06-25	corrected	296688	5.38895e+06	2527.22	3.4	3.65	571.22	2.08495
	16	annual transect	2009-06-25	corrected	296678	5.38885e+06	2564.9	5.4	5.65	583.243	3.29533
	17	annual transect	2009-06-25	corrected	296673	5.38881e+06	2583.96	8	8.25	593.661	4.8977
	bare ice	bare ice	2009-06-25	corrected	296530	5.38918e+06	2458.57	0	0	0	0
						Count:	80	na	80	80	80
						Mean:	2411.23	na	3.90587	564.42	2.24526
						Median:	2403.5	na	3.74	571.89	2.13887
						StdDev:	69.7591	na	1.33718	65.1098	0.801709
						Min:	2298.54	na	0	0	0
						Max:	2583.96	na	8.5	594.482	5.0531
						Range:	285.42	na	8.5	594.482	5.0531

## Sheet: 6
	Table S6: 2010 snow depths
	Coordinates: NAD83 UTM Zone 12N
	2010
	Point ID	Measurement Group	Date Measured	GPS	Easting	Northing	Elev (m)	Measured Depth (m)	Density (kg m-3)	bw
	A	stake site	2010-06-23	corrected	296743	5389407	2380	4.1	574.419	2.35512
	B	stake site	2010-06-23	corrected	296990	5389585	2324	4	573.739	2.29496
	C	stake site	2010-06-23	corrected	296712	5389162	2464	5.45	582.252	3.17327
	D	stake site	2010-06-23	corrected	296686	5388896	2549	6.4	586.673	3.75471
	E	stake site	2010-06-23	corrected	296443	5389176	2461	4.85	579.042	2.80835
	F	stake site	2010-06-23	corrected	297158	5389562	2352	4.6	577.586	2.65689
	G	stake site	2010-06-23	corrected	297003	5389133	2486	4.7	578.177	2.71743
	1	annual transect	2010-06-23	corrected	296690	5.38895e+06	2528.87	5.8	583.964	3.38699
	2	annual transect	2010-06-23	corrected	296683	5.3889e+06	2546.74	6.5	587.1	3.81615
	3	annual transect	2010-06-23	corrected	296677	5.38888e+06	2554.51	6.5	587.1	3.81615
	4	annual transect	2010-06-23	corrected	296676	5.38885e+06	2564.48	6.75	588.139	3.96994
	5	annual transect	2010-06-23	corrected	296691	5.389e+06	2514.75	3.4	569.267	1.93551
	6	annual transect	2010-06-23	corrected	296697	5.38906e+06	2499.79	3.45	569.669	1.96536
	7	annual transect	2010-06-23	corrected	296702	5.38911e+06	2480.6	3.85	572.688	2.20485
	9	annual transect	2010-06-23	corrected	296717	5.38921e+06	2442.88	4.75	578.469	2.74773
	10	annual transect	2010-06-23	corrected	296723	5.38926e+06	2426.62	5.4	581.998	3.14279
	11	annual transect	2010-06-23	corrected	296733	5.38931e+06	2410.25	3.9	573.043	2.23487
	12	annual transect	2010-06-23	corrected	296739	5.38936e+06	2395.57	4.5	576.981	2.59641
	13	annual transect	2010-06-23	corrected	296745	5.3894e+06	2378.88	4.25	575.408	2.44548
	14	annual transect	2010-06-23	corrected	296753	5.38946e+06	2363.88	4.05	574.081	2.32503
	15	annual transect	2010-06-23	corrected	296759	5.38951e+06	2348.75	5.1	580.425	2.96017
	16	annual transect	2010-06-23	corrected	296767	5.38957e+06	2337.83	3.9	573.043	2.23487
	17	annual transect	2010-06-23	corrected	296776	5.38962e+06	2321.98	3.6	570.84	2.05502
	18	annual transect	2010-06-23	corrected	296783	5.38967e+06	2303.54	4.35	576.048	2.50581
	19	annual transect	2010-06-23	corrected	296667	5.38894e+06	2535	6	584.897	3.50938
	20	annual transect	2010-06-23	corrected	296741	5.38918e+06	2445.13	4.8	578.757	2.77803
	21	annual transect	2010-06-23	corrected	296687	5.38895e+06	2523	5.45	582.252	3.17327
	22	annual transect	2010-06-23	corrected	296669	5.38894e+06	2527	6.2	585.8	3.63196
	1	transect 2	2010-06-23	corrected	296599	5.38934e+06	2408	4.47	576.797	2.57828
	2	transect 2	2010-06-23	corrected	296653	5.38933e+06	2410	5.6	582.999	3.26479
	3	transect 2	2010-06-23	corrected	296705	5.38932e+06	2413	4.15	574.753	2.38522
	4	transect 2	2010-06-23	corrected	296831	5.38929e+06	2418	4.03	573.945	2.313
	5	transect 2	2010-06-23	corrected	296918	5.38925e+06	2429	5.57	582.851	3.24648
	7	transect 2	2010-06-23	corrected	297134	5.3892e+06	2479	4.4	576.362	2.53599
	8	transect 2	2010-06-23	corrected	297184	5.38918e+06	2501	6.27	586.109	3.6749
	1	transect 2a	2010-06-23	corrected	297279	5.38994e+06	2299.03	6.25	586.021	3.66263
	2	transect 2a	2010-06-23	corrected	297255	5.38989e+06	2293.78	4.25	575.408	2.44548
	3	transect 2a	2010-06-23	corrected	297207	5.38984e+06	2301.35	4.6	577.586	2.65689
	4	transect 2a	2010-06-23	corrected	297157	5.38979e+06	2305.08	4.9	579.324	2.83869
	5	transect 2a	2010-06-23	corrected	297106	5.38974e+06	2304.18	3.7	571.594	2.1149
	6	transect 2a	2010-06-23	corrected	297058	5.3897e+06	2306.13	3.6	570.84	2.05502
	7	transect 2a	2010-06-23	corrected	296954	5.38961e+06	2314.97	4.3	575.73	2.47564
	8	transect 2a	2010-06-23	corrected	296848	5.38953e+06	2340.01	4.6	577.586	2.65689
	9	transect 2a	2010-06-23	corrected	296745	5.38944e+06	2361.98	3.1	566.725	1.75685
	10	transect 2a	2010-06-23	corrected	296692	5.3894e+06	2372.98	3.3	568.446	1.87587
	11	transect 2a	2010-06-23	corrected	296475	5.38923e+06	2426.51	1.67	549.702	0.918003
	12	transect 2a	2010-06-23	corrected	296450	5.38921e+06	2434.25	4.4	576.362	2.53599
	13	transect 2a	2010-06-23	corrected	296423	5.38919e+06	2439.47	4.85	579.042	2.80835
	14	transect 2a	2010-06-23	corrected	296395	5.38917e+06	2445.55	5.15	580.694	2.99057
	1	transect 3	2010-06-23	corrected	297379	5.38964e+06	2377	5.62	583.097	3.277
	2	transect 3	2010-06-23	corrected	297360	5.38962e+06	2374	5.55	582.752	3.23427
	4	transect 3	2010-06-23	corrected	297312	5.38959e+06	2382	5.35	581.742	3.11232
	5	transect 3	2010-06-23	corrected	297288	5.38955e+06	2388	4.6	577.586	2.65689
	6	transect 3	2010-06-23	corrected	297193	5.38944e+06	2387	4.08	574.284	2.34308
	7	transect 3	2010-06-23	corrected	297098	5.38934e+06	2409	4.43	576.549	2.55411
	8	transect 3	2010-06-23	corrected	297001	5.38924e+06	2434	3.53	570.3	2.01316
	9	transect 3	2010-06-23	corrected	296901	5.38914e+06	2460	4.37	576.174	2.51788
	10	transect 3	2010-06-23	corrected	296800	5.38905e+06	2492	5.3	581.484	3.08186
	13	transect 3	2010-06-23	corrected	296644	5.38891e+06	2536	5.33	581.639	3.10014
	14	transect 3	2010-06-23	corrected	296594	5.38894e+06	N/O	7	589.14	4.12398
	2	transect 3a	2010-06-23	corrected	296966	5.38944e+06	2362.08	4.6	577.586	2.65689
	3	transect 3a	2010-06-23	corrected	297174	5.38959e+06	2347.57	4.4	576.362	2.53599
	1	transect 4	2010-06-23	corrected	296524	5.38896e+06	2529	7	589.14	4.12398
	2	transect 4	2010-06-23	corrected	296571	5.38901e+06	2504	5.42	582.1	3.15498
	3	transect 4	2010-06-23	corrected	296597	5.38903e+06	2494	4.92	579.436	2.85083
	4	transect 4	2010-06-23	corrected	296646	5.38908e+06	2491	2.8	563.924	1.57899
	6	transect 4	2010-06-23	corrected	296876	5.38934e+06	2398	4.52	577.103	2.6085
	8	transect 4	2010-06-23	corrected	297069	5.38952e+06	2353	4.13	574.62	2.37318
	10	transect 4	2010-06-23	corrected	297271	5.38966e+06	2371	4.63	577.764	2.67505
	12	transect 4	2010-06-23	corrected	297344	5.38972e+06	2375	5.27	581.327	3.0636
	bare ice	bare ice	2015-06-23	corrected	296530	5.38918e+06	2458.57	0	0	0
						Count:	70	71	71	71
						Mean:	2419.88	4.68465	569.646	2.71301
						Median:	2411.63	4.6	577.586	2.65689
						StdDev:	76.036	1.16455	68.8697	0.697921
						Min:	2293.78	0	0	0
						Max:	2564.48	7	589.14	4.12398
						Range:	270.702	7	589.14	4.12398

## Sheet: 7
	Table S7: 2011 snow depths
	Coordinates: NAD83 UTM Zone 12N
	2011
	Point ID	Measurement Group	Date Measured	GPS	Easting	Northing	Elev (m)	Measured Depth (m)	Density (kg m-3)	bw
	A	stake site	2011-06-24	corrected	296741	5389397	2380	6.6	587.52	3.87763
	B	stake site	2011-06-24	corrected	296992	5389597	2324	6.56333	587.367	3.85509
	C	stake site	2011-06-24	corrected	296714	5389170	2464	7.65	591.583	4.52561
	D	stake site	2011-06-24	corrected	296687	5388900	2549	8.55	594.644	5.08421
	E	stake site	2011-06-24	corrected	296440	5389172	2461	5.96667	584.744	3.48897
	F	stake site	2011-06-24	corrected	297155	5389566	2352	6.07333	585.232	3.55431
	G	stake site	2011-06-24	corrected	296997	5389120	2486	7.13333	589.659	4.20623
	1	annual transect	2011-06-24	corrected	296644	5388761	2620.1	8.5	594.482	5.0531
	2	annual transect	2011-06-24	corrected	296660	5388779	2605.39	8.5	594.482	5.0531
	3	annual transect	2011-06-24	corrected	296670	5388801	2592.44	7.32	590.37	4.32151
	4	annual transect	2011-06-24	corrected	296675	5388853	2570.79	7.87	592.363	4.6619
	5	annual transect	2011-06-24	corrected	296681	5388903	2549.89	7.42	590.743	4.38331
	6	annual transect	2011-06-24	corrected	296694	5388958	2531.12	8.08	593.088	4.79215
	7	annual transect	2011-06-24	corrected	296691	5389007	2518.89	7.13	589.646	4.20418
	8	annual transect	2011-06-24	corrected	296696	5389057	2502.79	6.95	588.942	4.09315
	9	annual transect	2011-06-24	corrected	296705	5389110	2483.36	6.33	586.371	3.71173
	10	annual transect	2011-06-24	corrected	296712	5389157	2463.07	5.88	584.341	3.43593
	11	annual transect	2011-06-24	corrected	296725	5389262	N/O	8.05	592.986	4.77353
	12	annual transect	2011-06-24	corrected	296719	5389209	N/O	8.58	594.74	5.10287
	13	annual transect	2011-06-24	corrected	296732	5389314	2414	6.03	585.035	3.52776
	14	annual transect	2011-06-24	corrected	296741	5389361	2395	6.58	587.437	3.86533
	15	annual transect	2011-06-24	corrected	296746	5389417	2382	6.48	587.015	3.80386
	16	annual transect	2011-06-24	corrected	296752	5389461	2366	5.9	584.435	3.44817
	17	annual transect	2011-06-24	corrected	296759	5389513	2351	6.65	587.728	3.90839
	18	annual transect	2011-06-24	corrected	296767	5389570	2336	5.83	584.106	3.40534
	19	annual transect	2011-06-24	corrected	296784	5389627	2325	6.18	585.711	3.61969
	20	annual transect	2011-06-24	corrected	296780	5389675	2301	7.23	590.029	4.26591
						Count:	25	27	27	27
						Mean:	2452.95	7.03802	589.067	4.149
						Median:	2463.07	6.95	588.942	4.09315
						StdDev:	98.2204	0.918171	3.54813	0.566786
						Min:	2301	5.83	584.106	3.40534
						Max:	2620.1	8.58	594.74	5.10287
						Range:	319.1	2.75	10.6338	1.69753

## Sheet: 8
	Table S8: 2012 snow depths
	Coordinates: NAD83 UTM Zone 12N
	2012
	Point ID	Measurement Group	Date Measured	GPS	Easting	Northing	Elev (m)	Measured Depth (m)	Depth on June 28 (m)	Density (kg m-3)	bw
	A	stake site	2015-06-28	uncorrected	296737	5.3894e+06	2376.54	5.15	5.15	580.694	2.99057
	B	stake site	2015-07-12	uncorrected	296987	5.38959e+06	2322.85	4.6	5.1	580.425	2.96017
	C	stake site	2015-06-28	uncorrected	296709	5.38917e+06	2453.5	6.4	6.4	586.673	3.75471
	D	stake site	2015-06-28	uncorrected	296679	5.3889e+06	2547.03	9	9	596.055	5.3645
	E	stake site	2015-06-28	uncorrected	296440	5.38918e+06	2450.04	4.25	4.25	575.408	2.44548
	F	stake site	2015-06-28	uncorrected	297156	5.38956e+06	2357.77	6.15	6.15	585.577	3.6013
	G	stake site	2015-07-12	uncorrected	296995	5.38913e+06	2480.25	5.4	6.65	587.728	3.90839
	6	annual transect	2015-07-12	corrected	296694	5.38896e+06	2532.73	7.85	9.09	596.329	5.42063
	9	annual transect	2015-07-12	corrected	296705	5.38911e+06	2483.03	3	4.24	575.343	2.43945
	10	annual transect	2015-07-12	corrected	296712	5.38916e+06	2464.73	5.45	6.69	587.893	3.933
	11	annual transect	2015-07-12	corrected	296719	5.38921e+06	2447.13	5.05	6.29	586.196	3.68718
	12	annual transect	2015-07-12	corrected	296726	5.38931e+06	2412.55	4	5.24	581.17	3.04533
	13	annual transect	2015-07-12	corrected	296741	5.38936e+06	2396.08	1.95	3.19	567.513	1.81037
	14	annual transect	2015-07-12	corrected	296746	5.38942e+06	2378.24	2	3.24	567.941	1.84013
	15	annual transect	2015-07-12	corrected	296750	5.38946e+06	2363.94	3.65	4.89	579.268	2.83262
	16	annual transect	2015-07-12	corrected	296759	5.38951e+06	2349.85	4.25	5.49	582.453	3.19767
	17	annual transect	2015-07-12	corrected	296767	5.38957e+06	2337.66	4.1	5.34	581.691	3.10623
	18	annual transect	2015-07-12	corrected	296784	5.38963e+06	2320.5	2.85	4.09	574.352	2.3491
	19	annual transect	2015-07-12	corrected	296780	5.38968e+06	2303.01	4	5.24	581.17	3.04533
						Count:	19	na	19	19	19
						Mean:	2409.34	na	5.56474	581.783	3.24906
						Median:	2396.08	na	5.24	581.17	3.04533
						StdDev:	72.6677	na	1.5995	7.77789	0.979252
						Min:	2303.01	na	3.19	567.513	1.81037
						Max:	2547.03	na	9.09	596.329	5.42063
						Range:	244.02	na	5.9	28.8166	3.61027

## Sheet: 9
	Table S9: 2013 snow depths
	Coordinates: NAD83 UTM Zone 12N
	2013
	Point ID	Measurement Group	Date Measured	GPS	Easting	Northing	Elev (m)	Measured Depth (m)	Density (kg m-3)	bw
	A	stake site	2015-06-11	corrected	296735	5.38941e+06	2381.94	5.05	580.154	2.92978
	B	stake site	2015-06-11	corrected	296989	5.38959e+06	2327.95	5.15	580.694	2.99057
	C	stake site	2015-06-11	corrected	296711	5.38918e+06	2459.67	5.05	580.154	2.92978
	D	stake site	2015-06-11	corrected	296683	5.38891e+06	2551.44	7.25	590.105	4.27826
	E	stake site	2015-06-11	corrected	296439	5.38918e+06	2457.72	4.5	576.981	2.59641
	F	stake site	2015-06-11	corrected	297152	5.38956e+06	2348.16	5.3	581.484	3.08186
	G	stake site	2015-06-11	corrected	296996	5.38913e+06	2485.99	5.05	580.154	2.92978
	5	annual transect	2015-06-11	corrected	296681	5.38891e+06	2554.82	7.23333	590.042	4.26797
	6	annual transect	2015-06-11	corrected	296694	5.38896e+06	2536.01	5.75	583.726	3.35643
	7	annual transect	2015-06-11	corrected	296691	5.38901e+06	2520.85	4.3	575.73	2.47564
	8	annual transect	2015-06-11	corrected	296696	5.38906e+06	2505.11	3.85	572.688	2.20485
	9	annual transect	2015-06-11	corrected	296705	5.38911e+06	2485.07	4.13333	574.642	2.37519
	10	annual transect	2015-06-11	corrected	296710	5.38918e+06	2459.8	5.03333	580.063	2.91965
	11	annual transect	2015-06-11	corrected	296718	5.38921e+06	2448.88	5.26667	581.31	3.06157
	12	annual transect	2015-06-11	corrected	296726	5.38931e+06	2413.44	4.41667	576.466	2.54606
	13	annual transect	2015-06-11	corrected	296741	5.38936e+06	2397.07	5.06667	580.245	2.93991
	14	annual transect	2015-06-11	corrected	296752	5.38946e+06	2365.13	4.55	577.285	2.62665
	15	annual transect	2015-06-11	corrected	296759	5.38951e+06	2349.74	4.75	578.469	2.74773
	16	annual transect	2015-06-11	corrected	296768	5.38957e+06	2337.5	4.43333	576.57	2.55613
	17	annual transect	2015-06-11	corrected	296784	5.38963e+06	2320.35	4.26667	575.515	2.45553
	18	annual transect	2015-06-11	corrected	296780	5.38968e+06	2303.22	4.88333	579.23	2.82858
						Count:	21	21	21	21
						Mean:	2429.04	5.01349	579.605	2.90944
						Median:	2448.88	5.03333	580.063	2.91965
						StdDev:	81.4203	0.868821	4.37208	0.530303
						Min:	2303.22	3.85	572.688	2.20485
						Max:	2554.82	7.25	590.105	4.27826
						Range:	251.6	3.4	17.4176	2.07342

## Sheet: 10
	Table S10: 2014 snow depths
	Coordinates: NAD83 UTM Zone 12N
	2014
	Point ID	Measurement Group	Date Measured	GPS	Easting	Northing	Elev (m)	Measured Depth (m)	Density (kg m-3)	bw
	A	stake site	2015-06-11	uncorrected	296735	5.38941e+06	2381.94	5.45	549	2.99205
	B	stake site	2015-06-11	uncorrected	296989	5.38959e+06	2327.95	5.62	536	3.01232
	C	stake site	2015-06-11	uncorrected	296711	5.38918e+06	2459.67	5.19	507	2.63133
	D	stake site	2015-06-11	uncorrected	296683	5.38891e+06	2551.44	7.95	551	4.38045
	E	stake site	2015-06-11	uncorrected	296439	5.38918e+06	2457.72	3.8	536	2.0368
	F	stake site	2015-06-11	uncorrected	297152	5.38956e+06	2348.16	5.27	536	2.82472
	G	stake site	2015-06-11	uncorrected	296996	5.38913e+06	2485.99	5.28	536	2.83008
						Count:	7	7	7	7
						Mean:	2430.41	5.50857	535.857	2.95825
						Median:	2457.72	5.28	536	2.83008
						StdDev:	80.5728	1.23196	14.3461	0.709098
						Min:	2327.95	3.8	507	2.0368
						Max:	2551.44	7.95	551	4.38045
						Range:	223.49	4.15	44	2.34365

[truncated: 12 more sheets: 11, 12, 13, 14, 15, 16, 17, 18, 19, 20, 21, 22]
