# Supplementary material for: Glaciological measurements and mass balances from Sperry Glacier, Montana, USA, years 2005–2015
Source: Copernicus journal article supplement (doi:10.5194/essd-9-47-2017), 2017-01-23
Supplement: Supplementary file 2 [file essd-9-47-2017-supplement.zip]

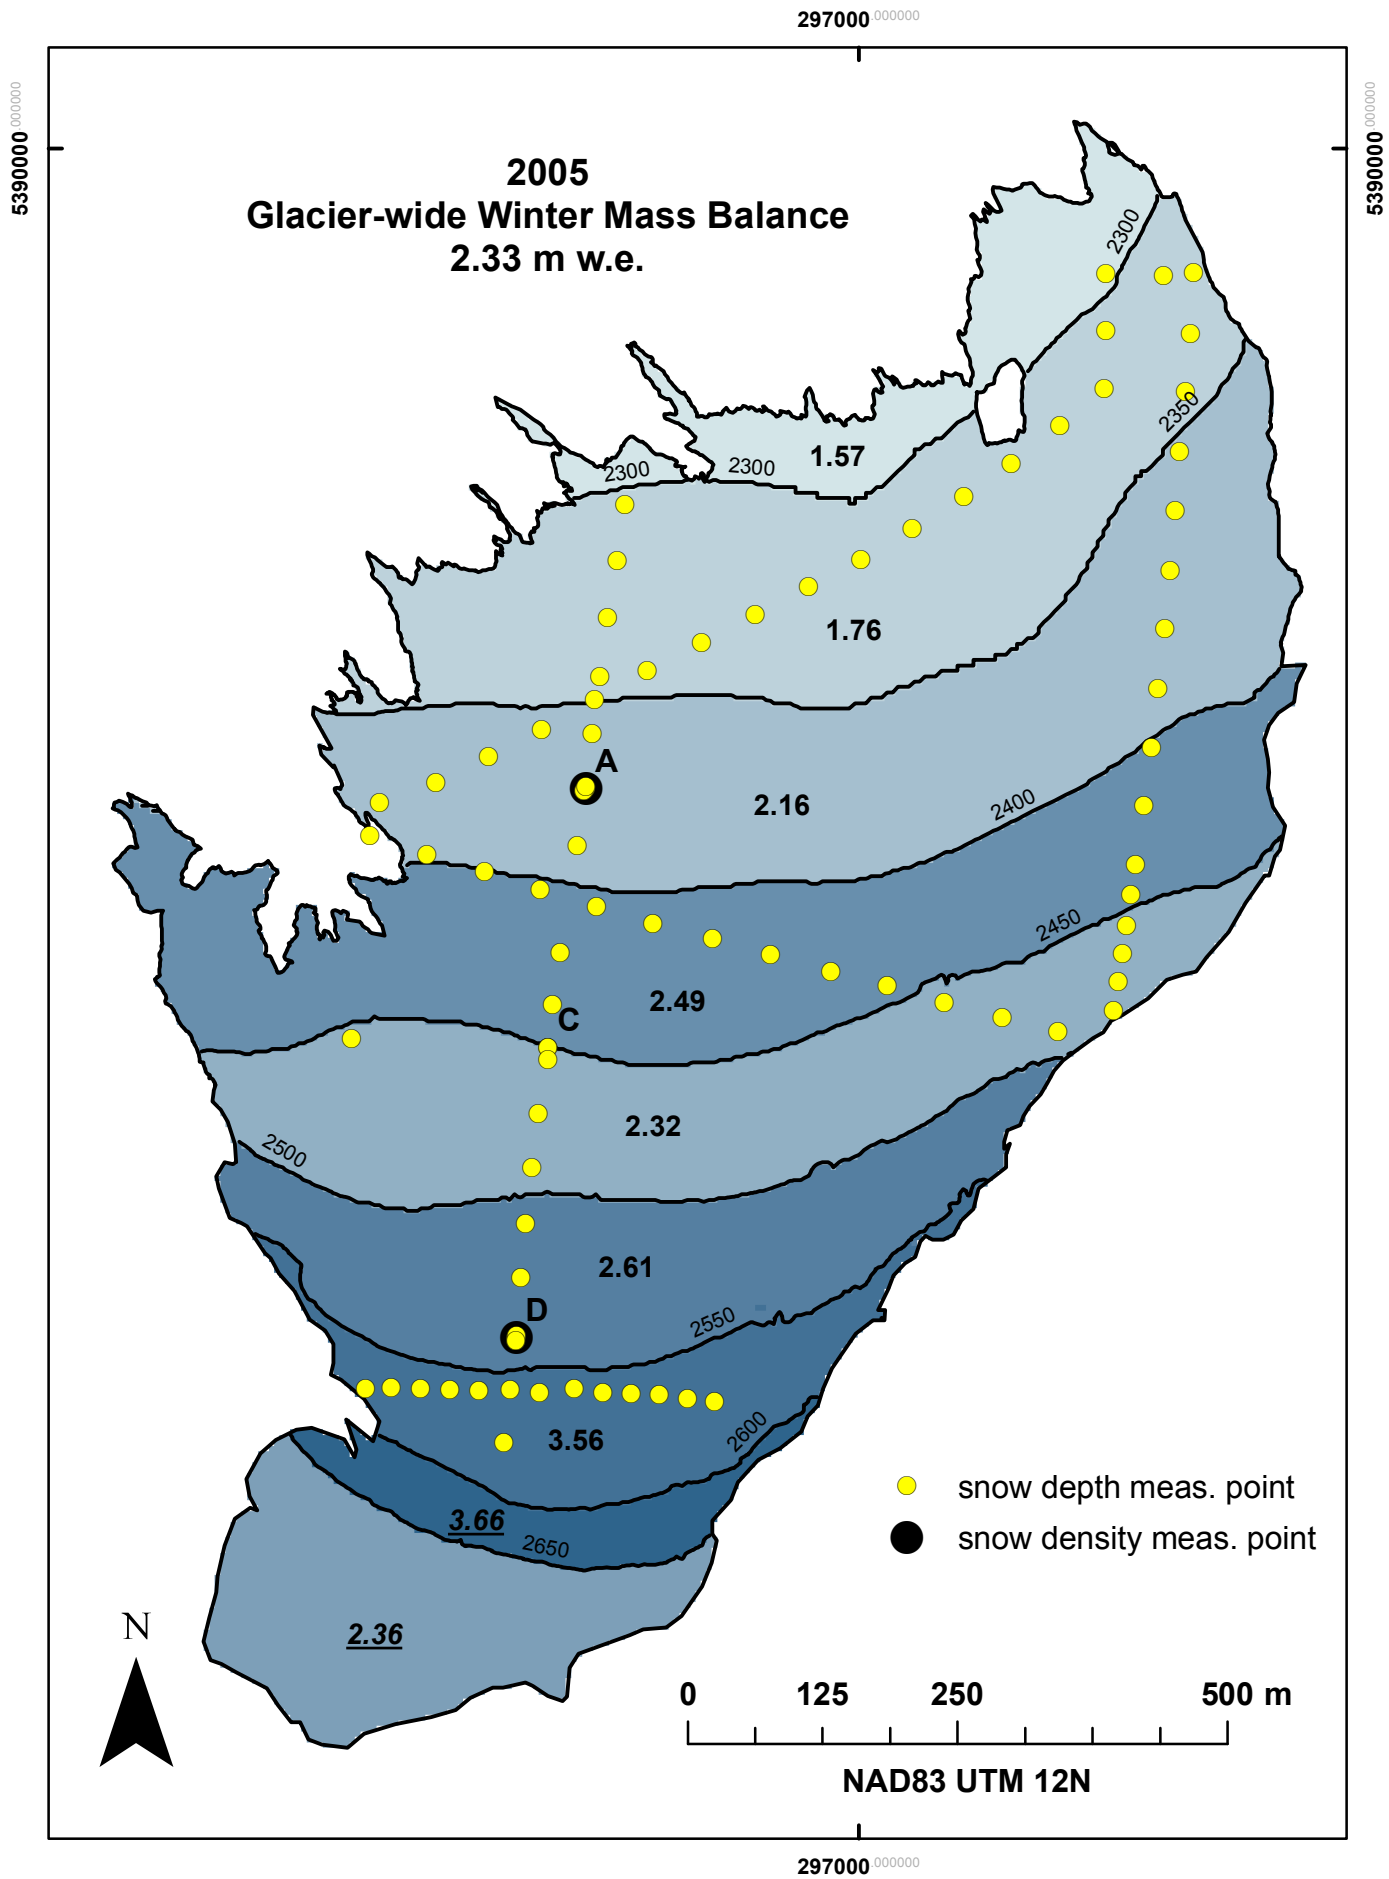

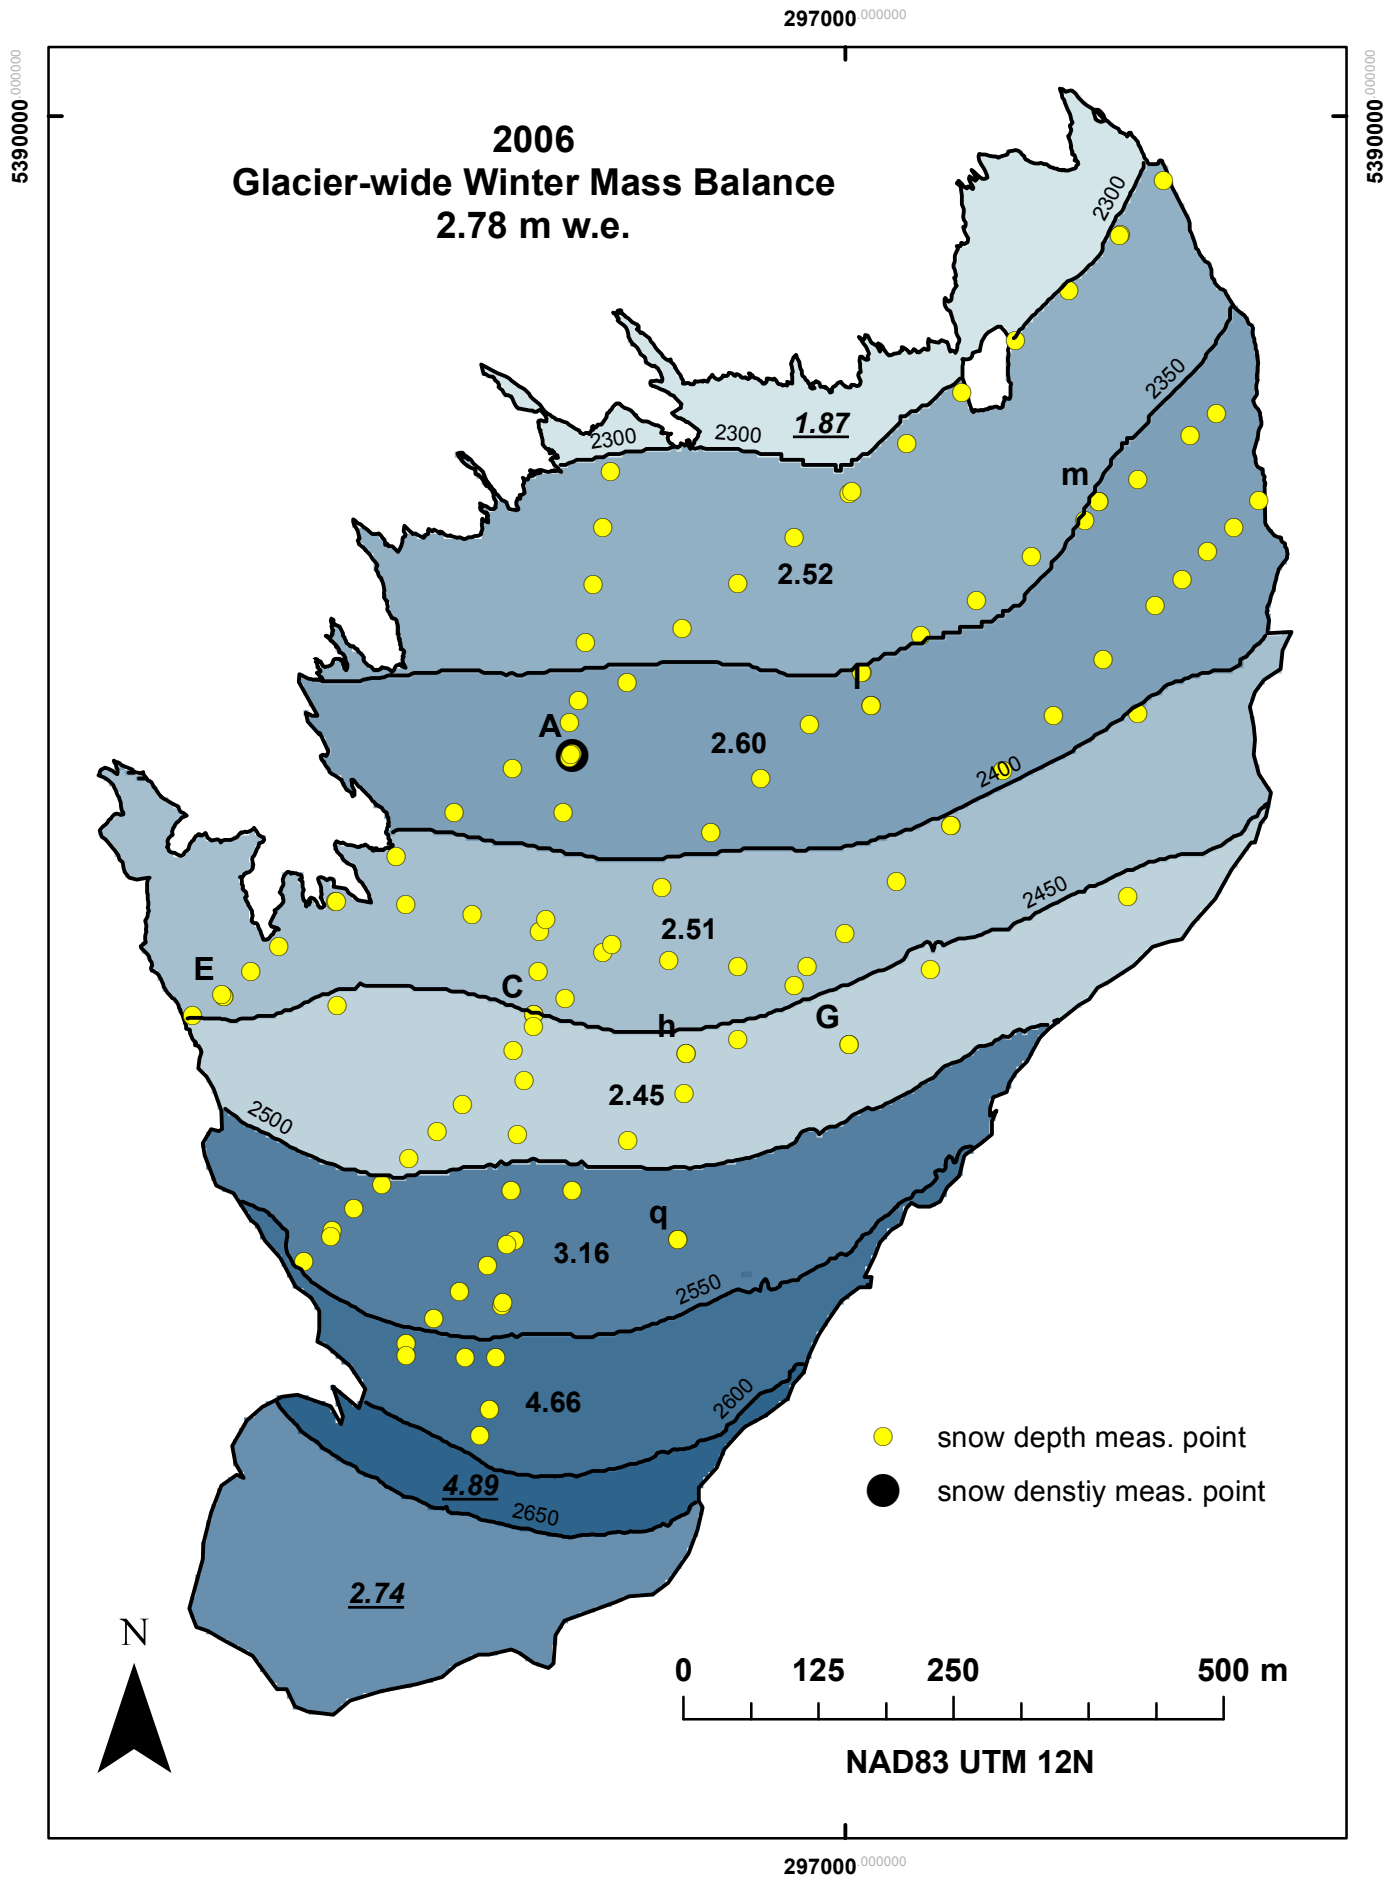

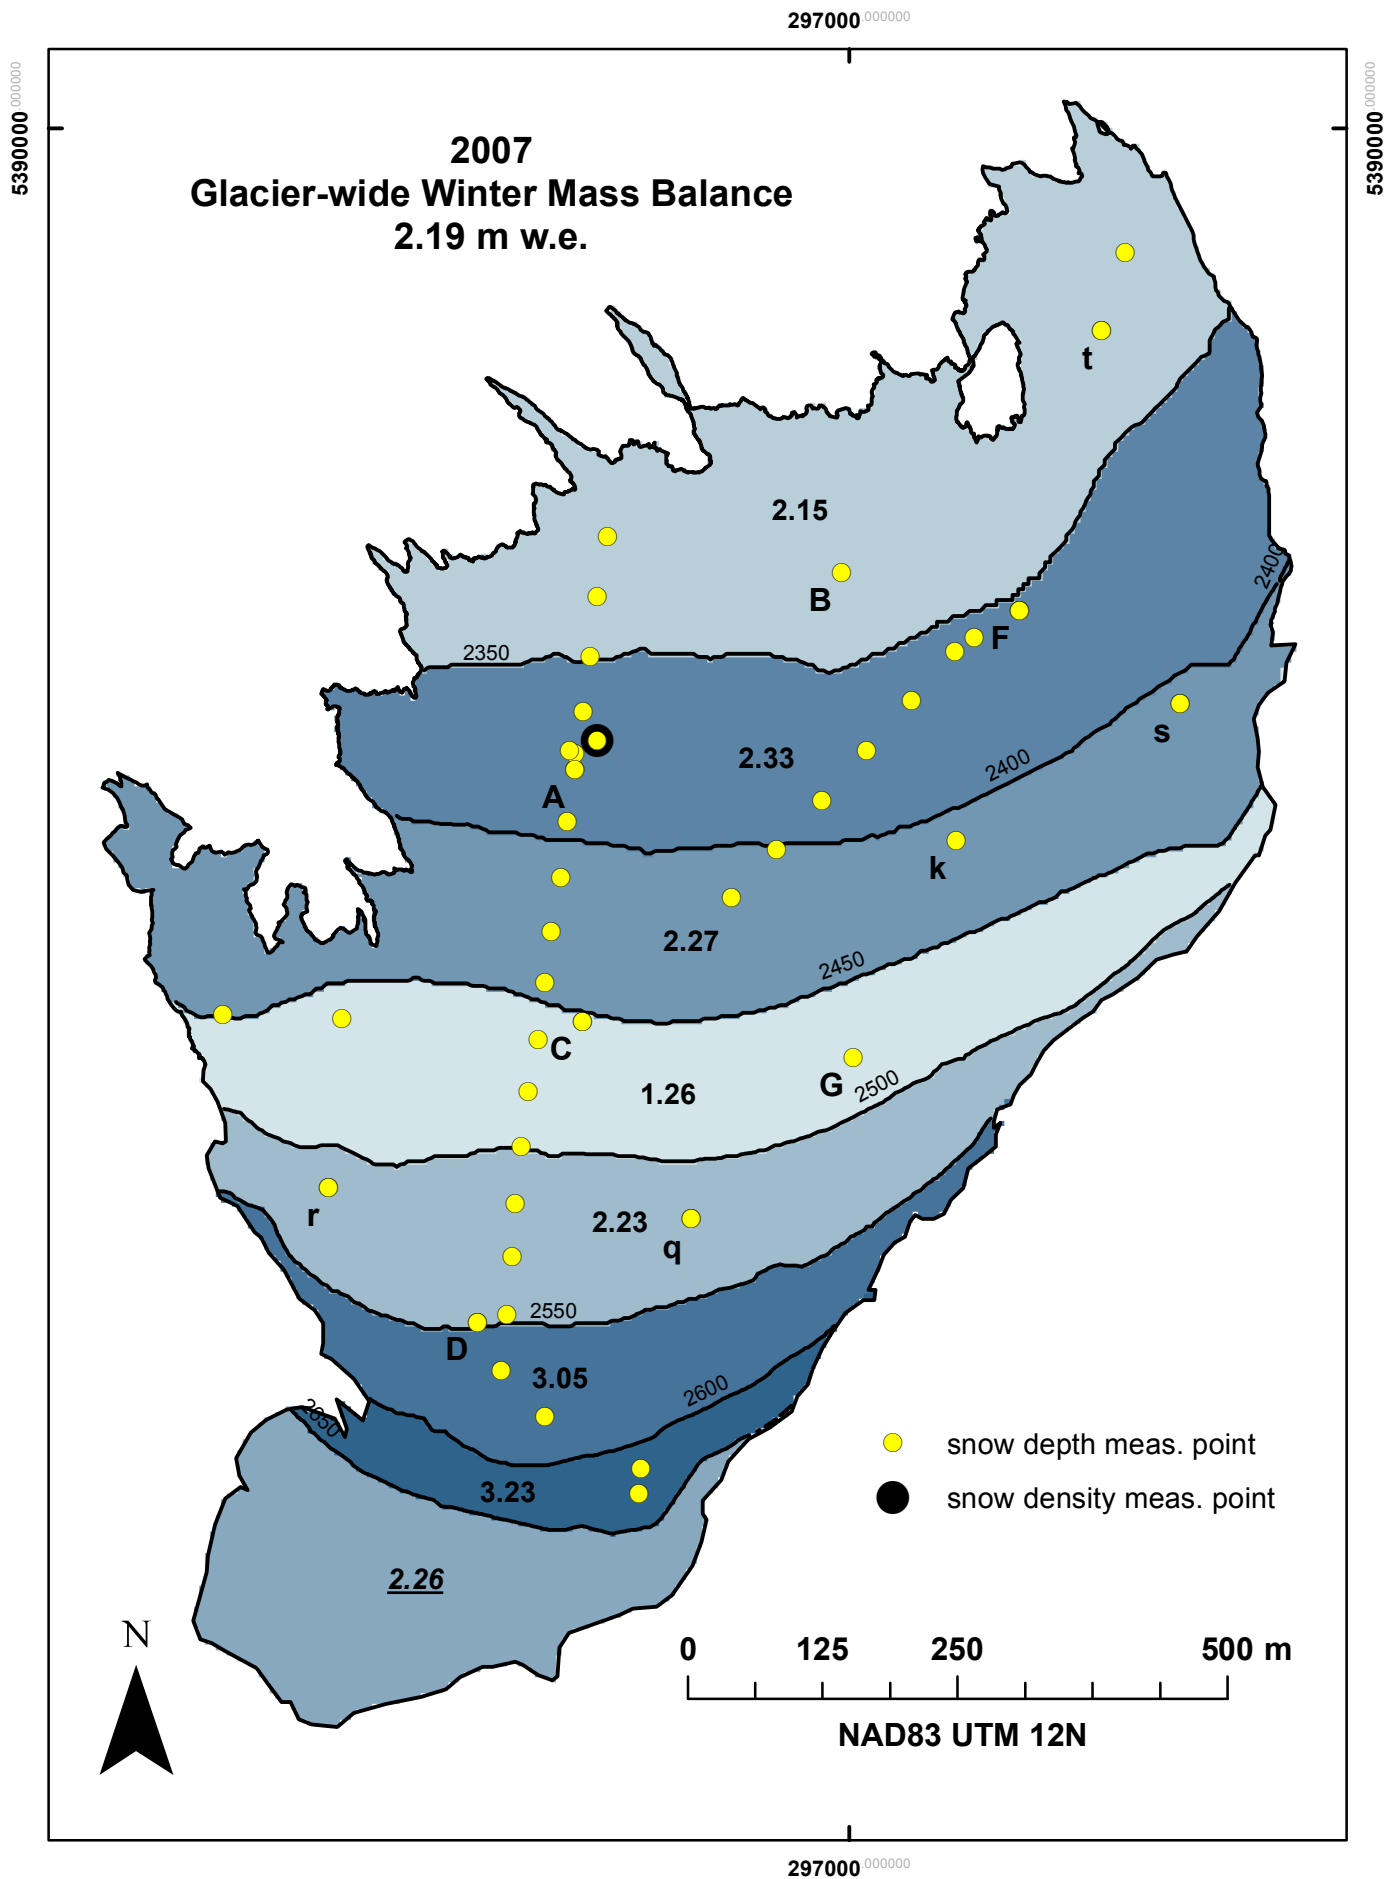

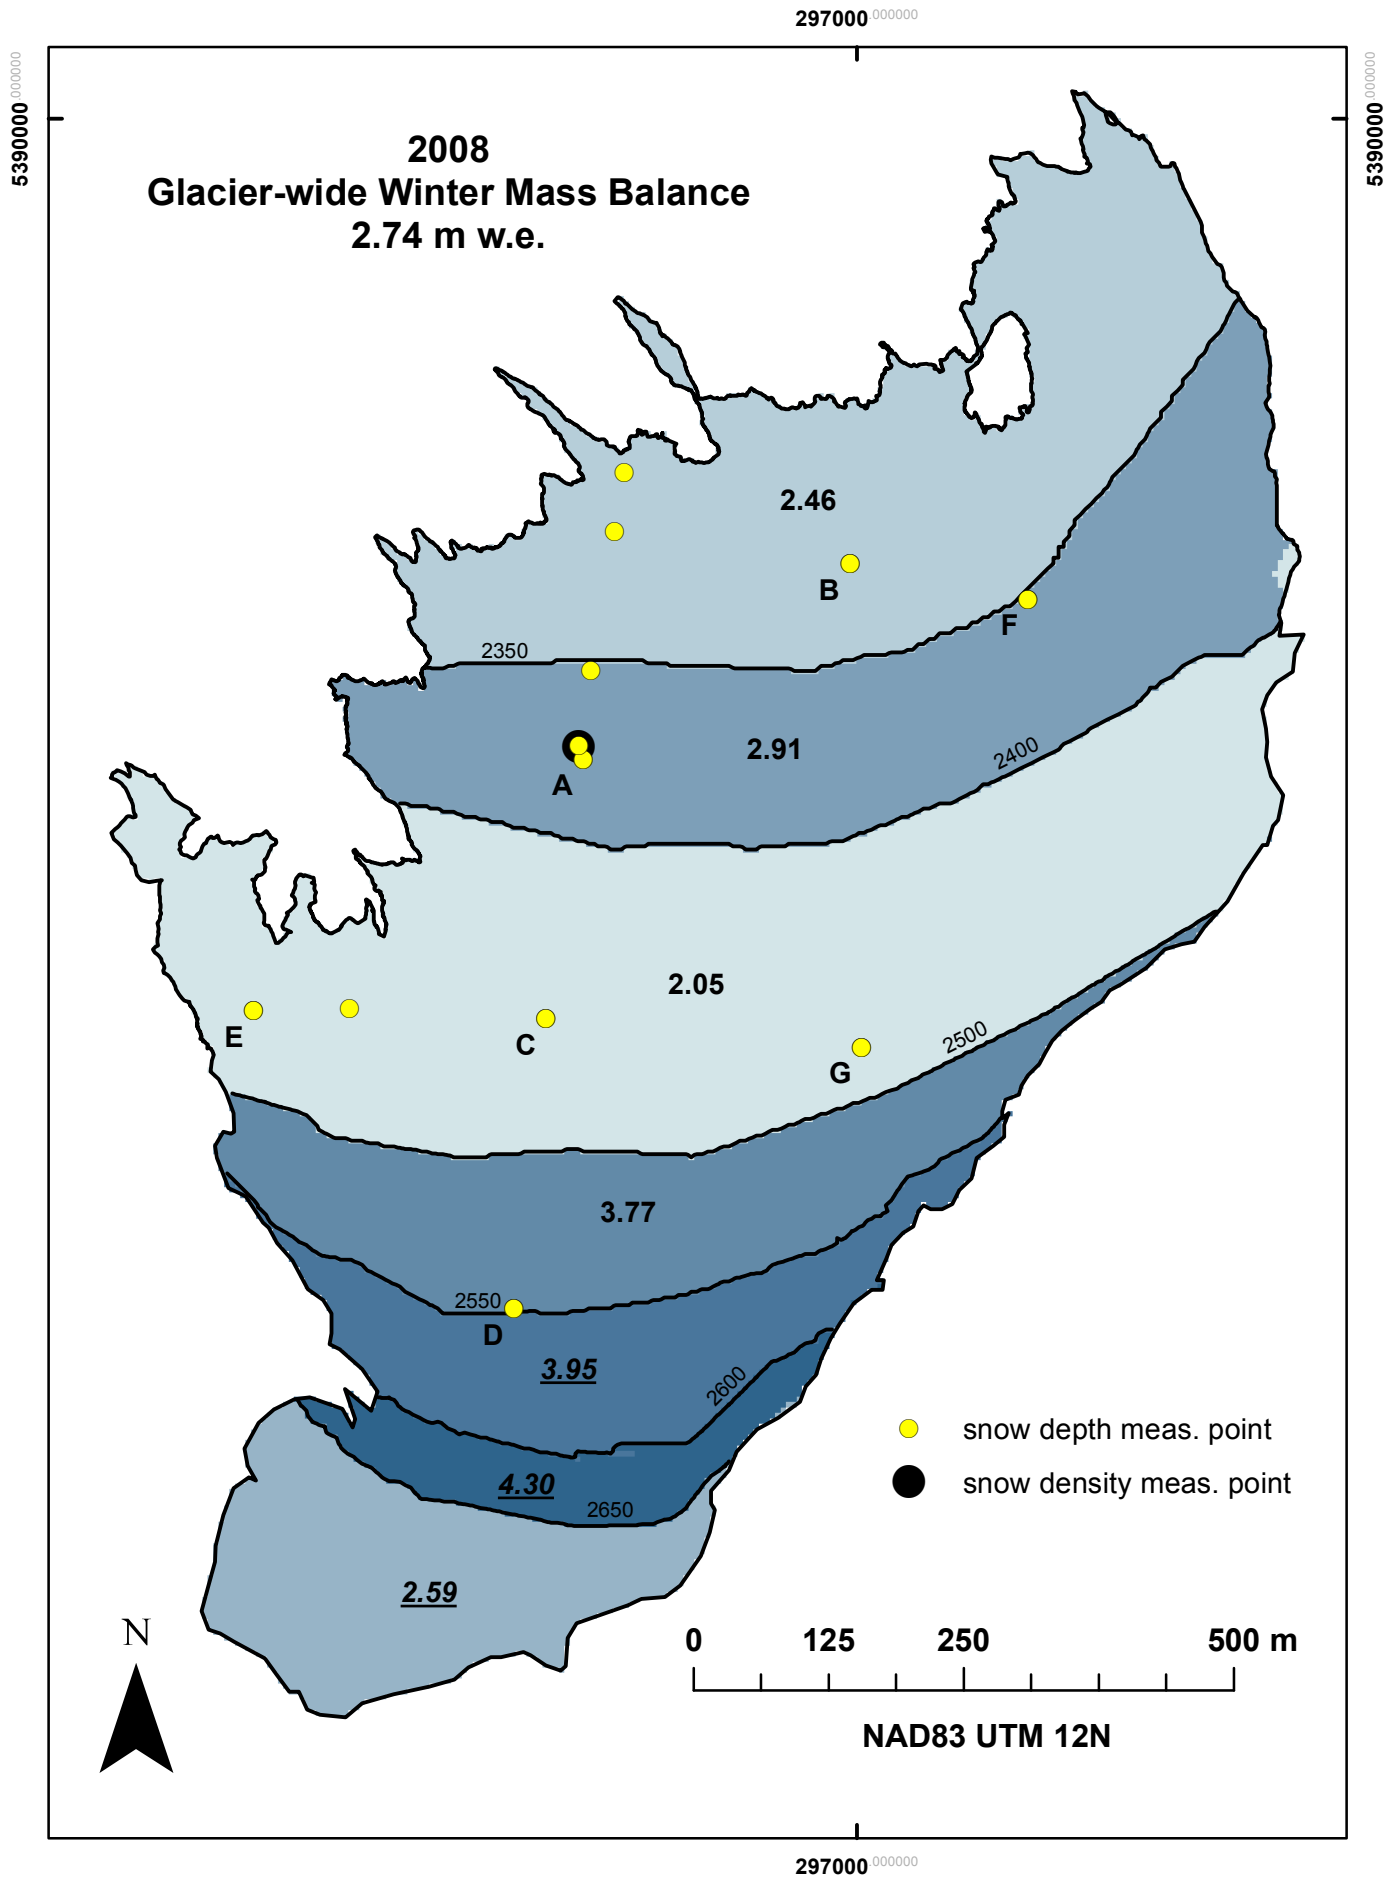

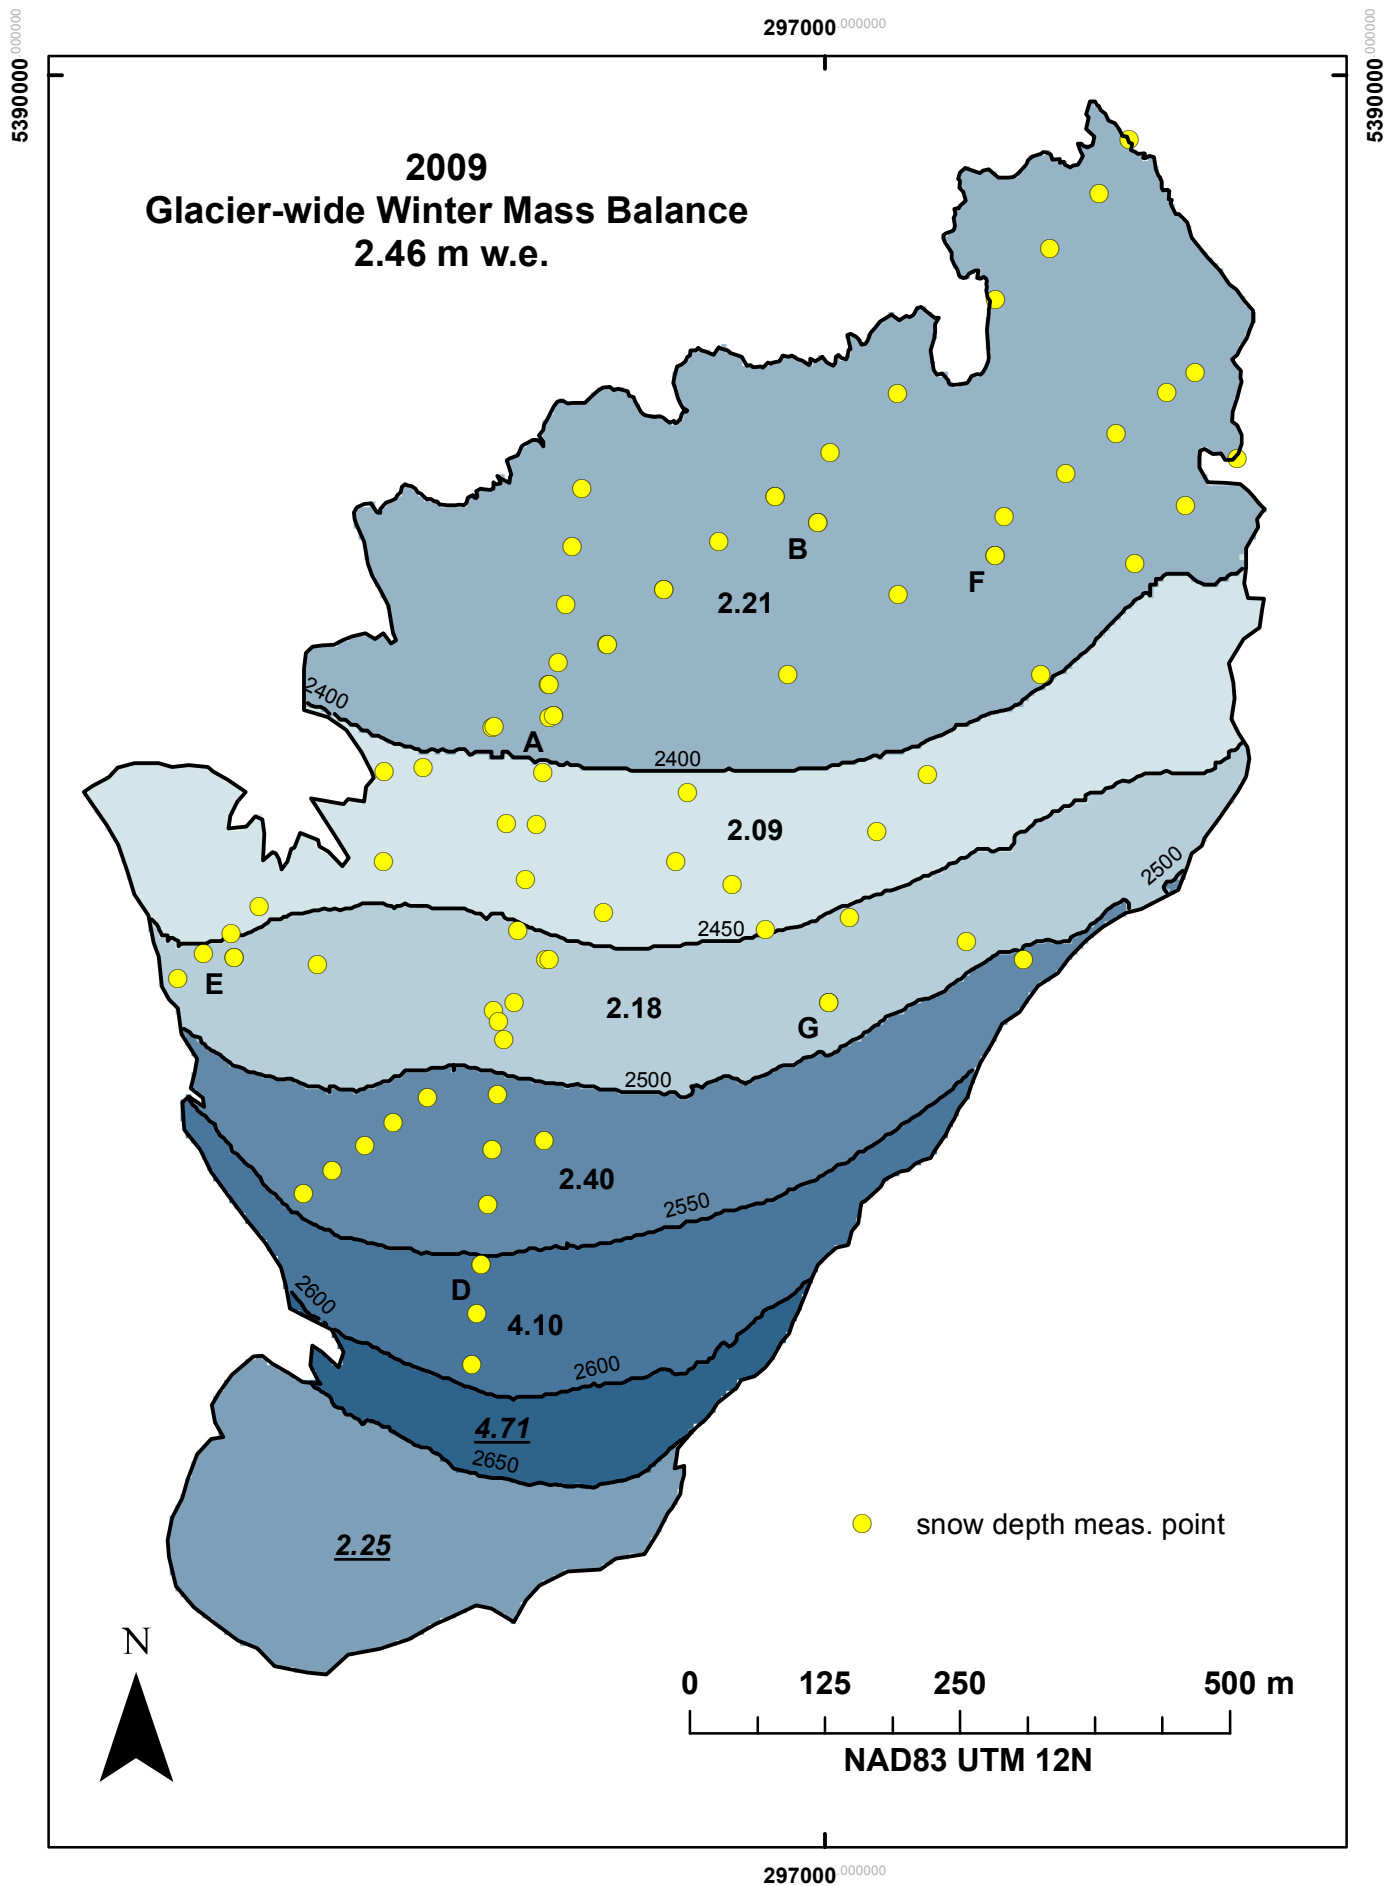

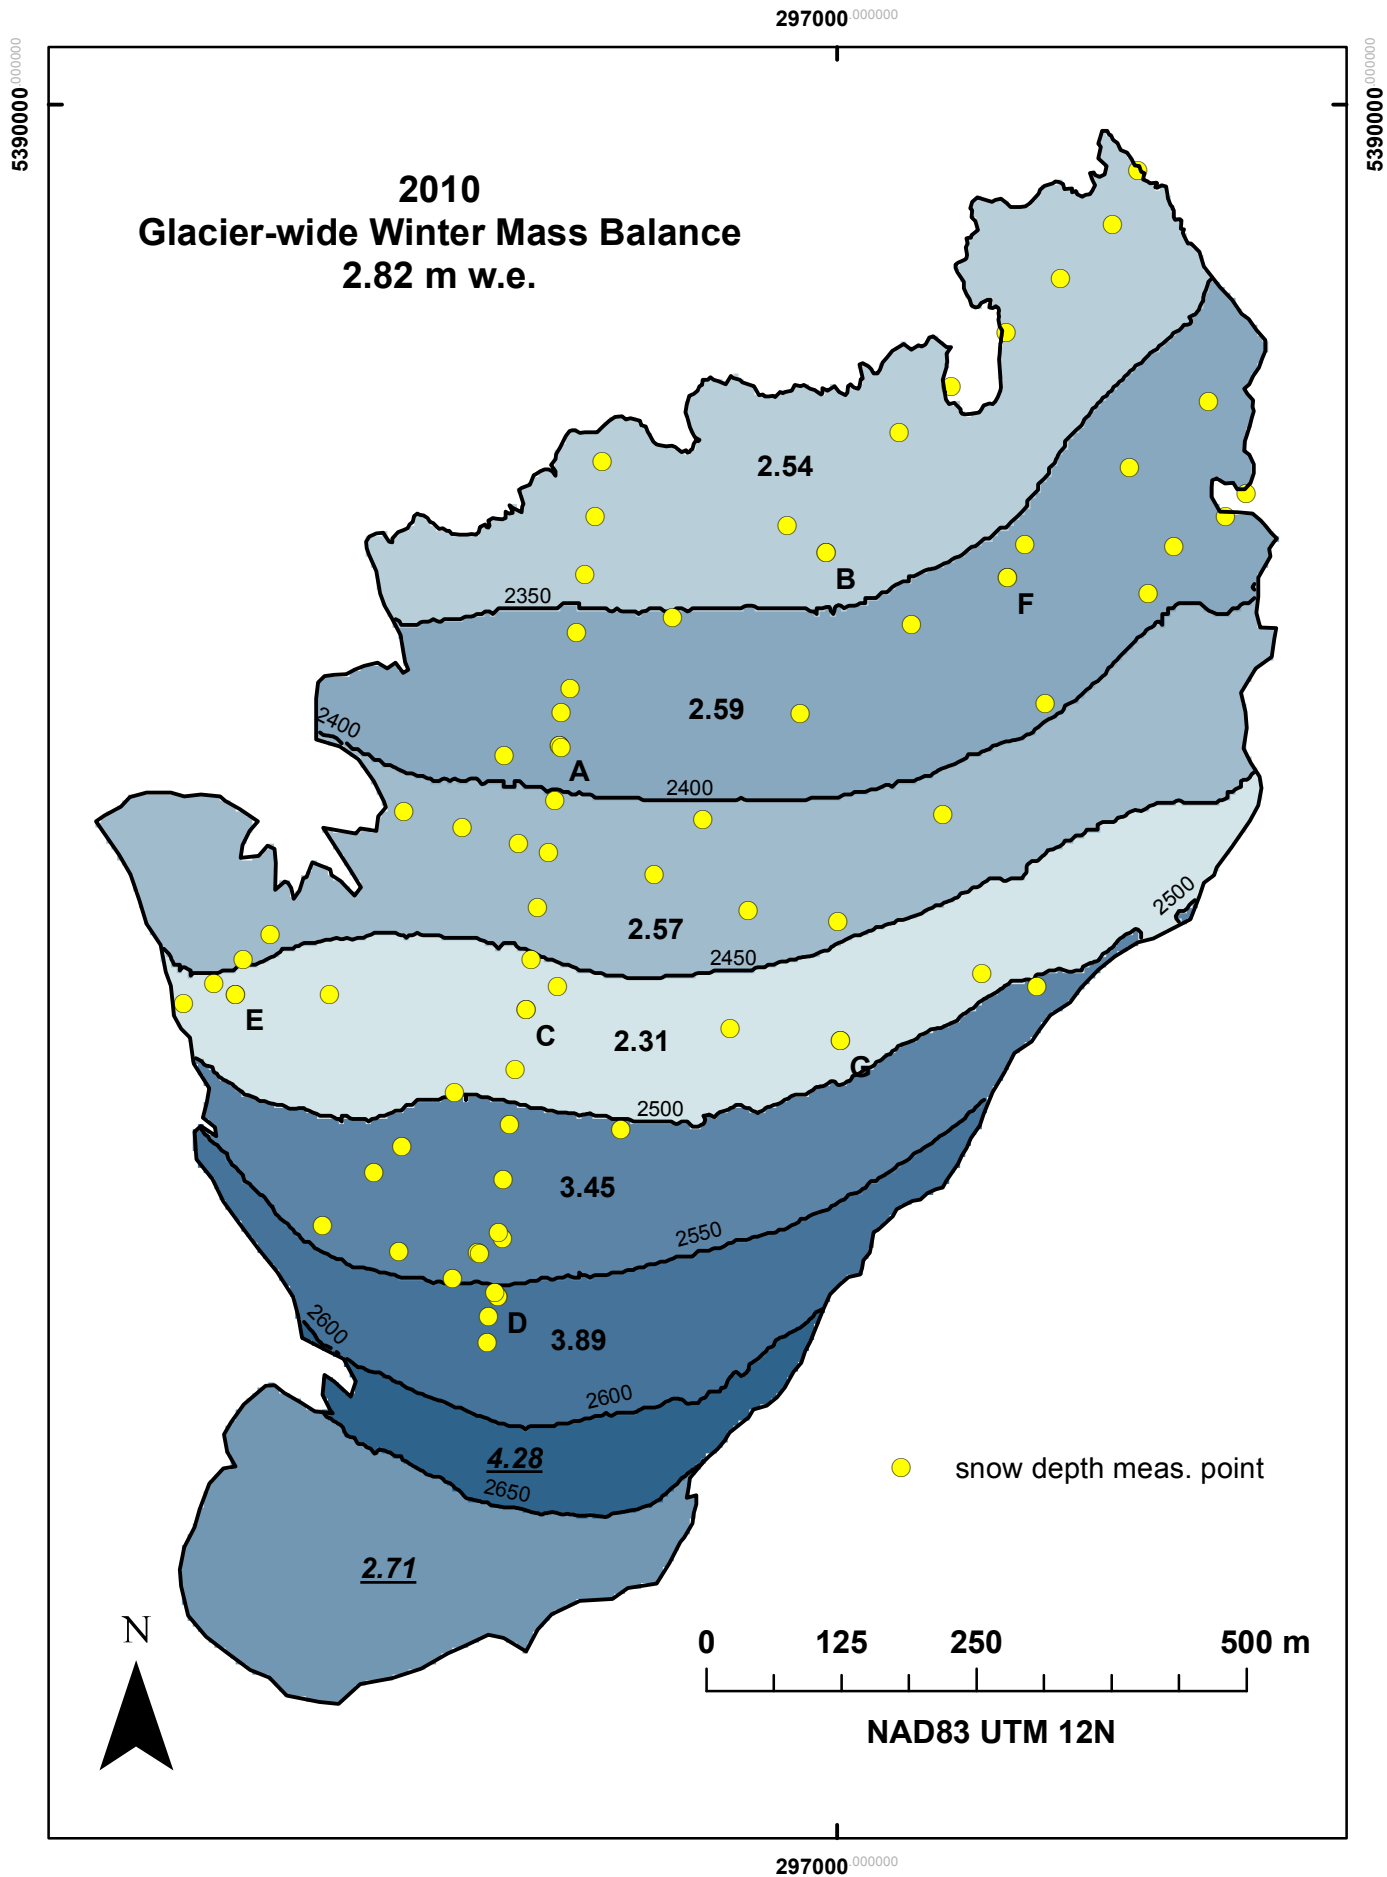

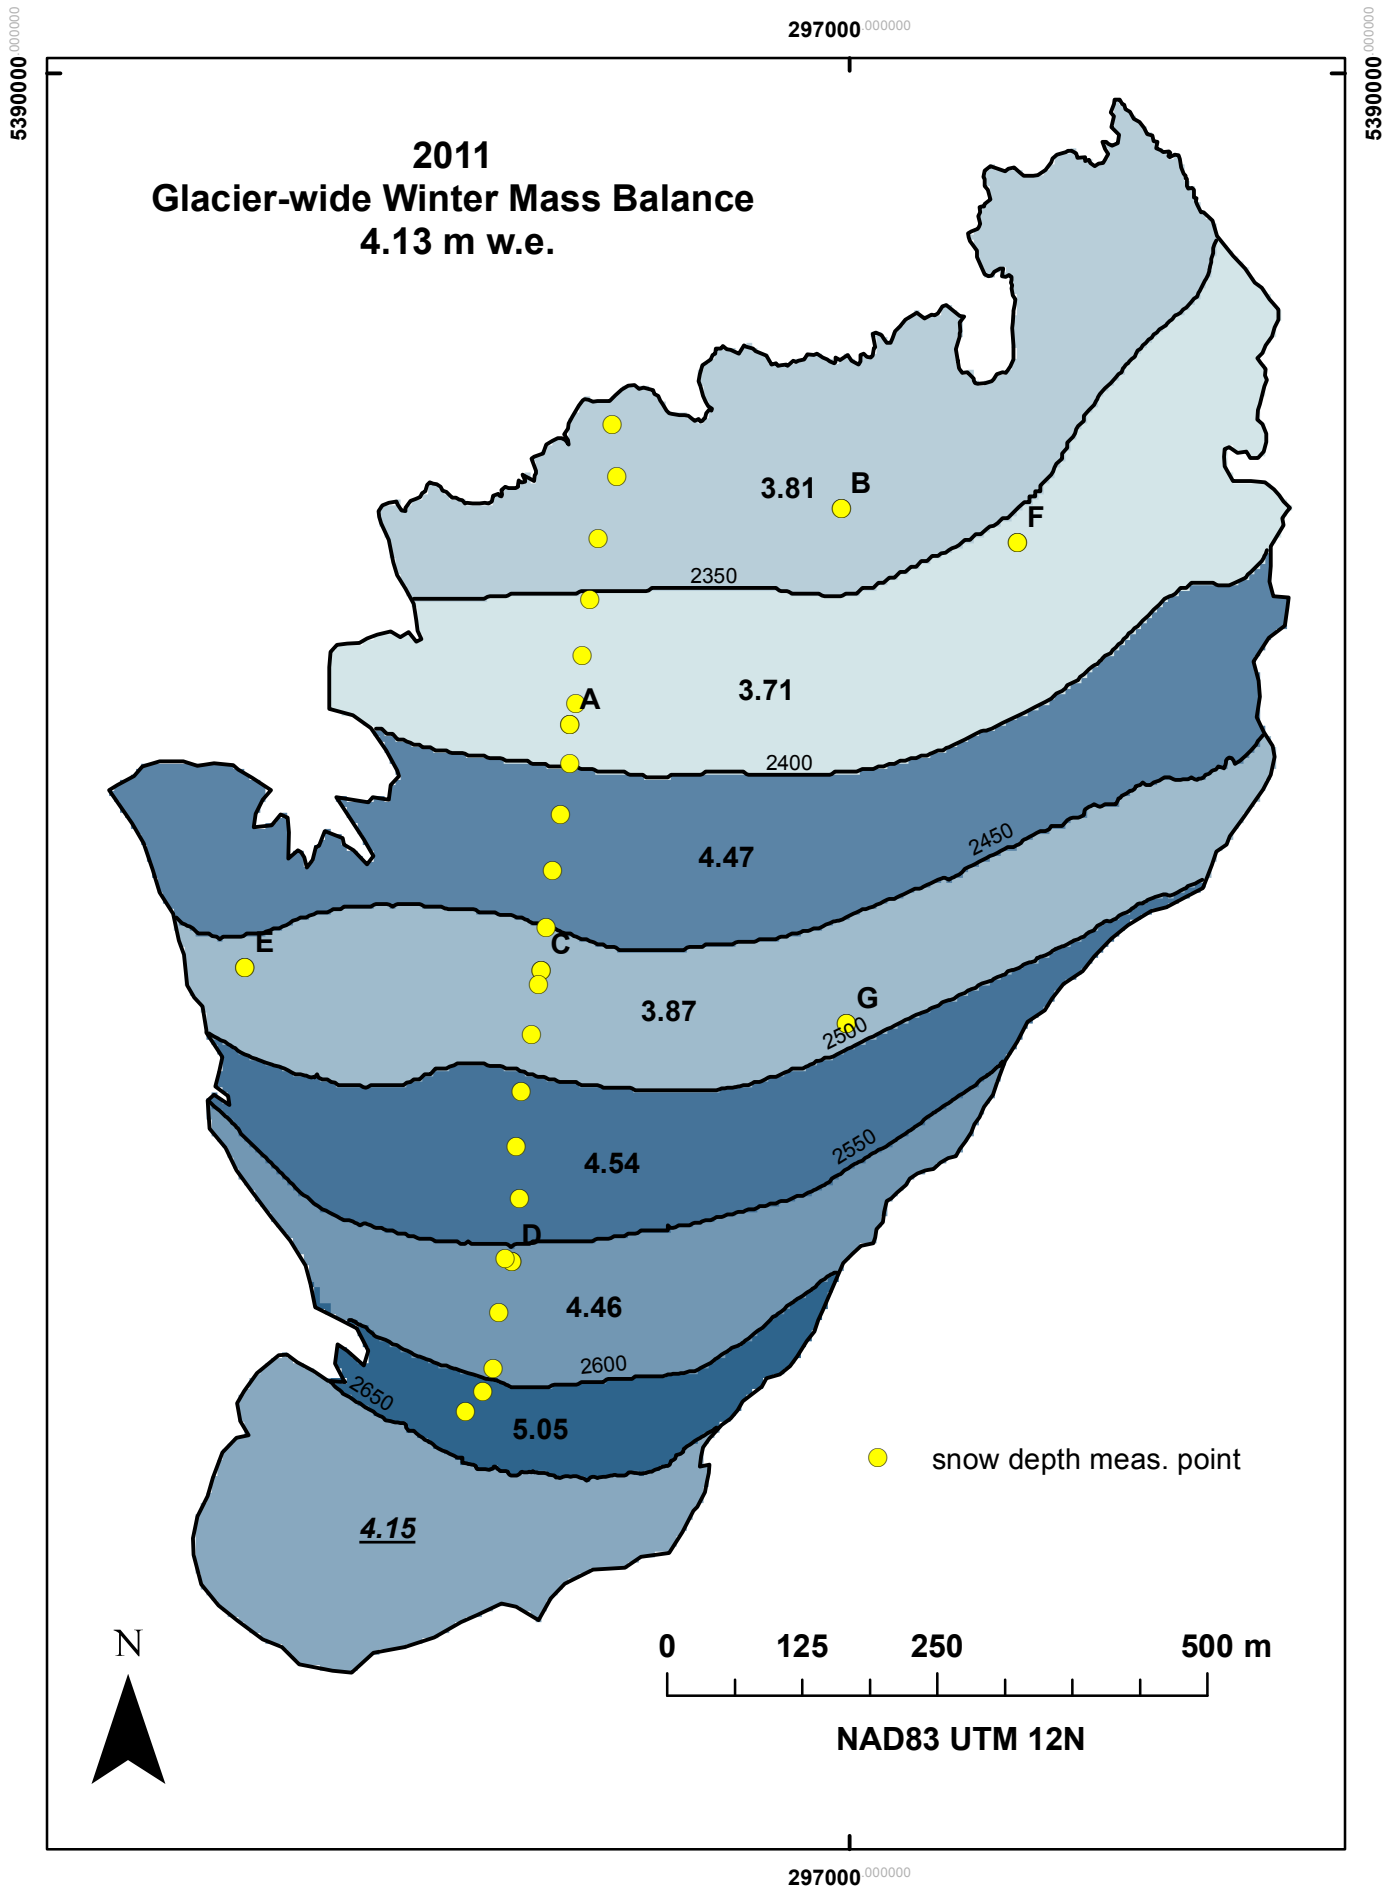

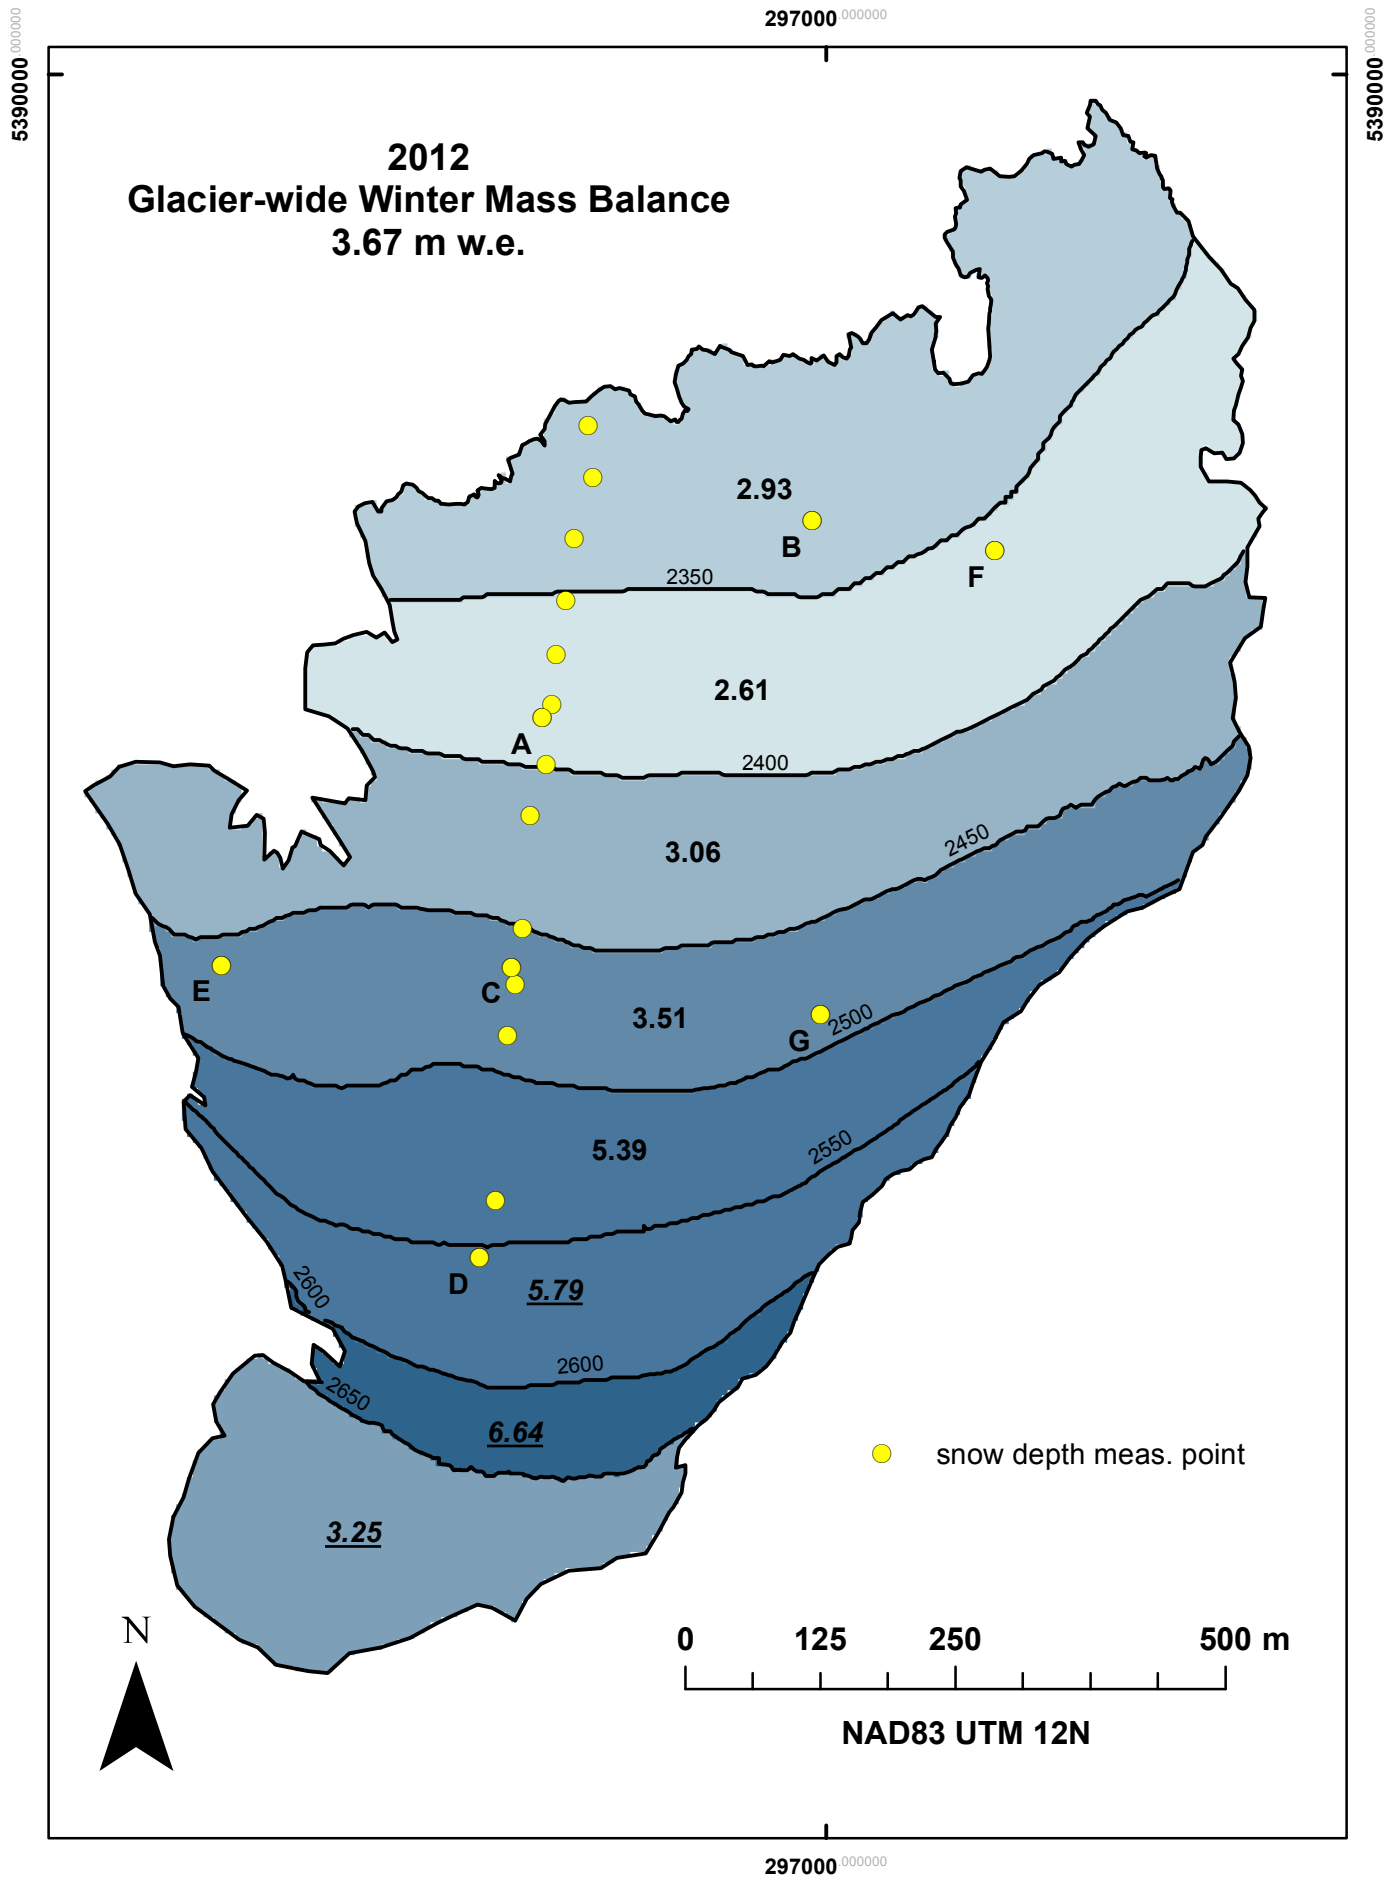



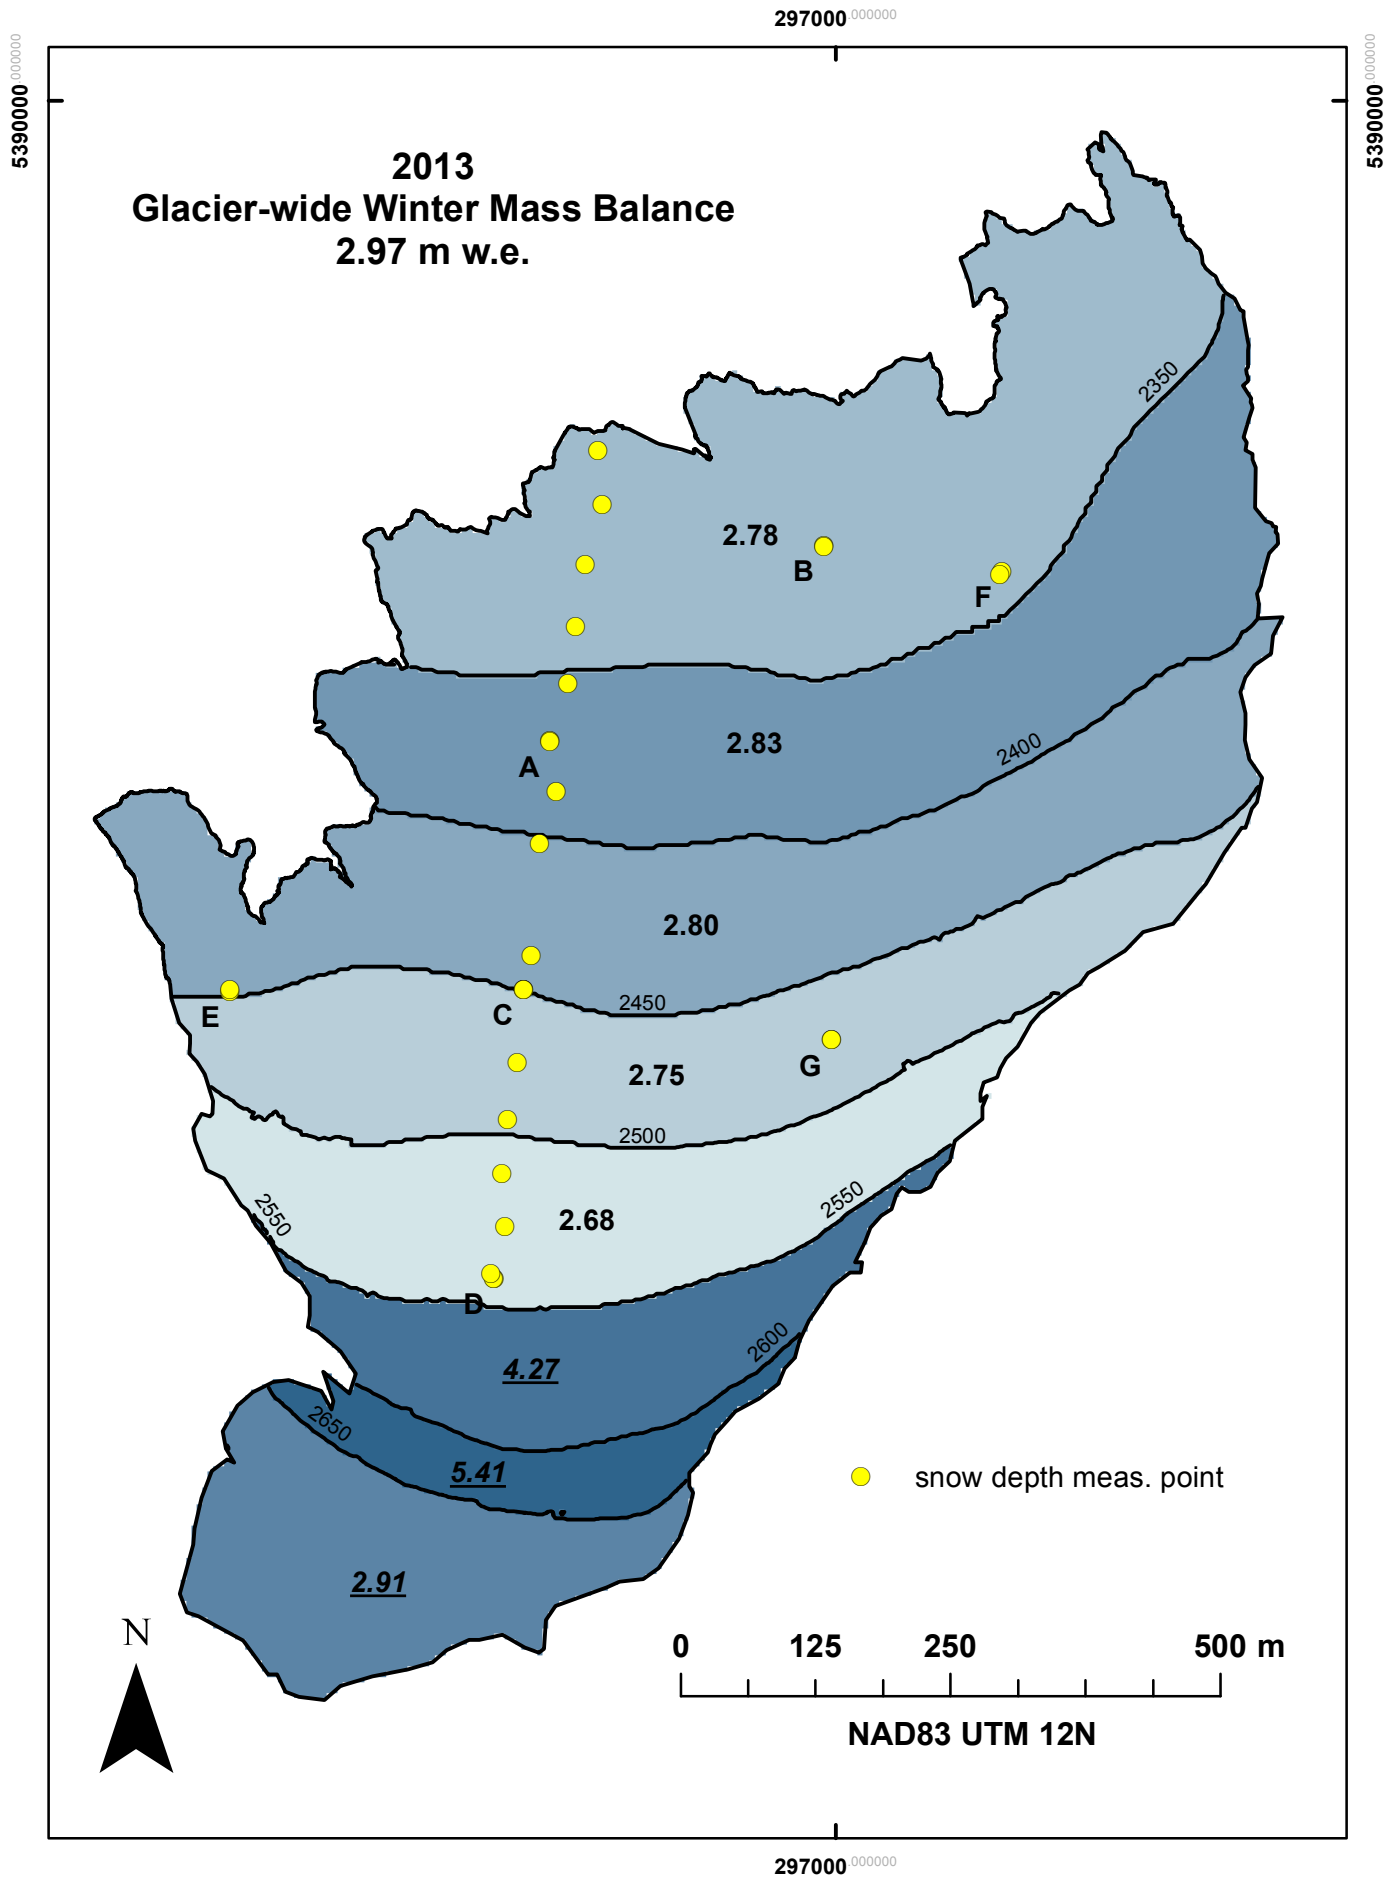

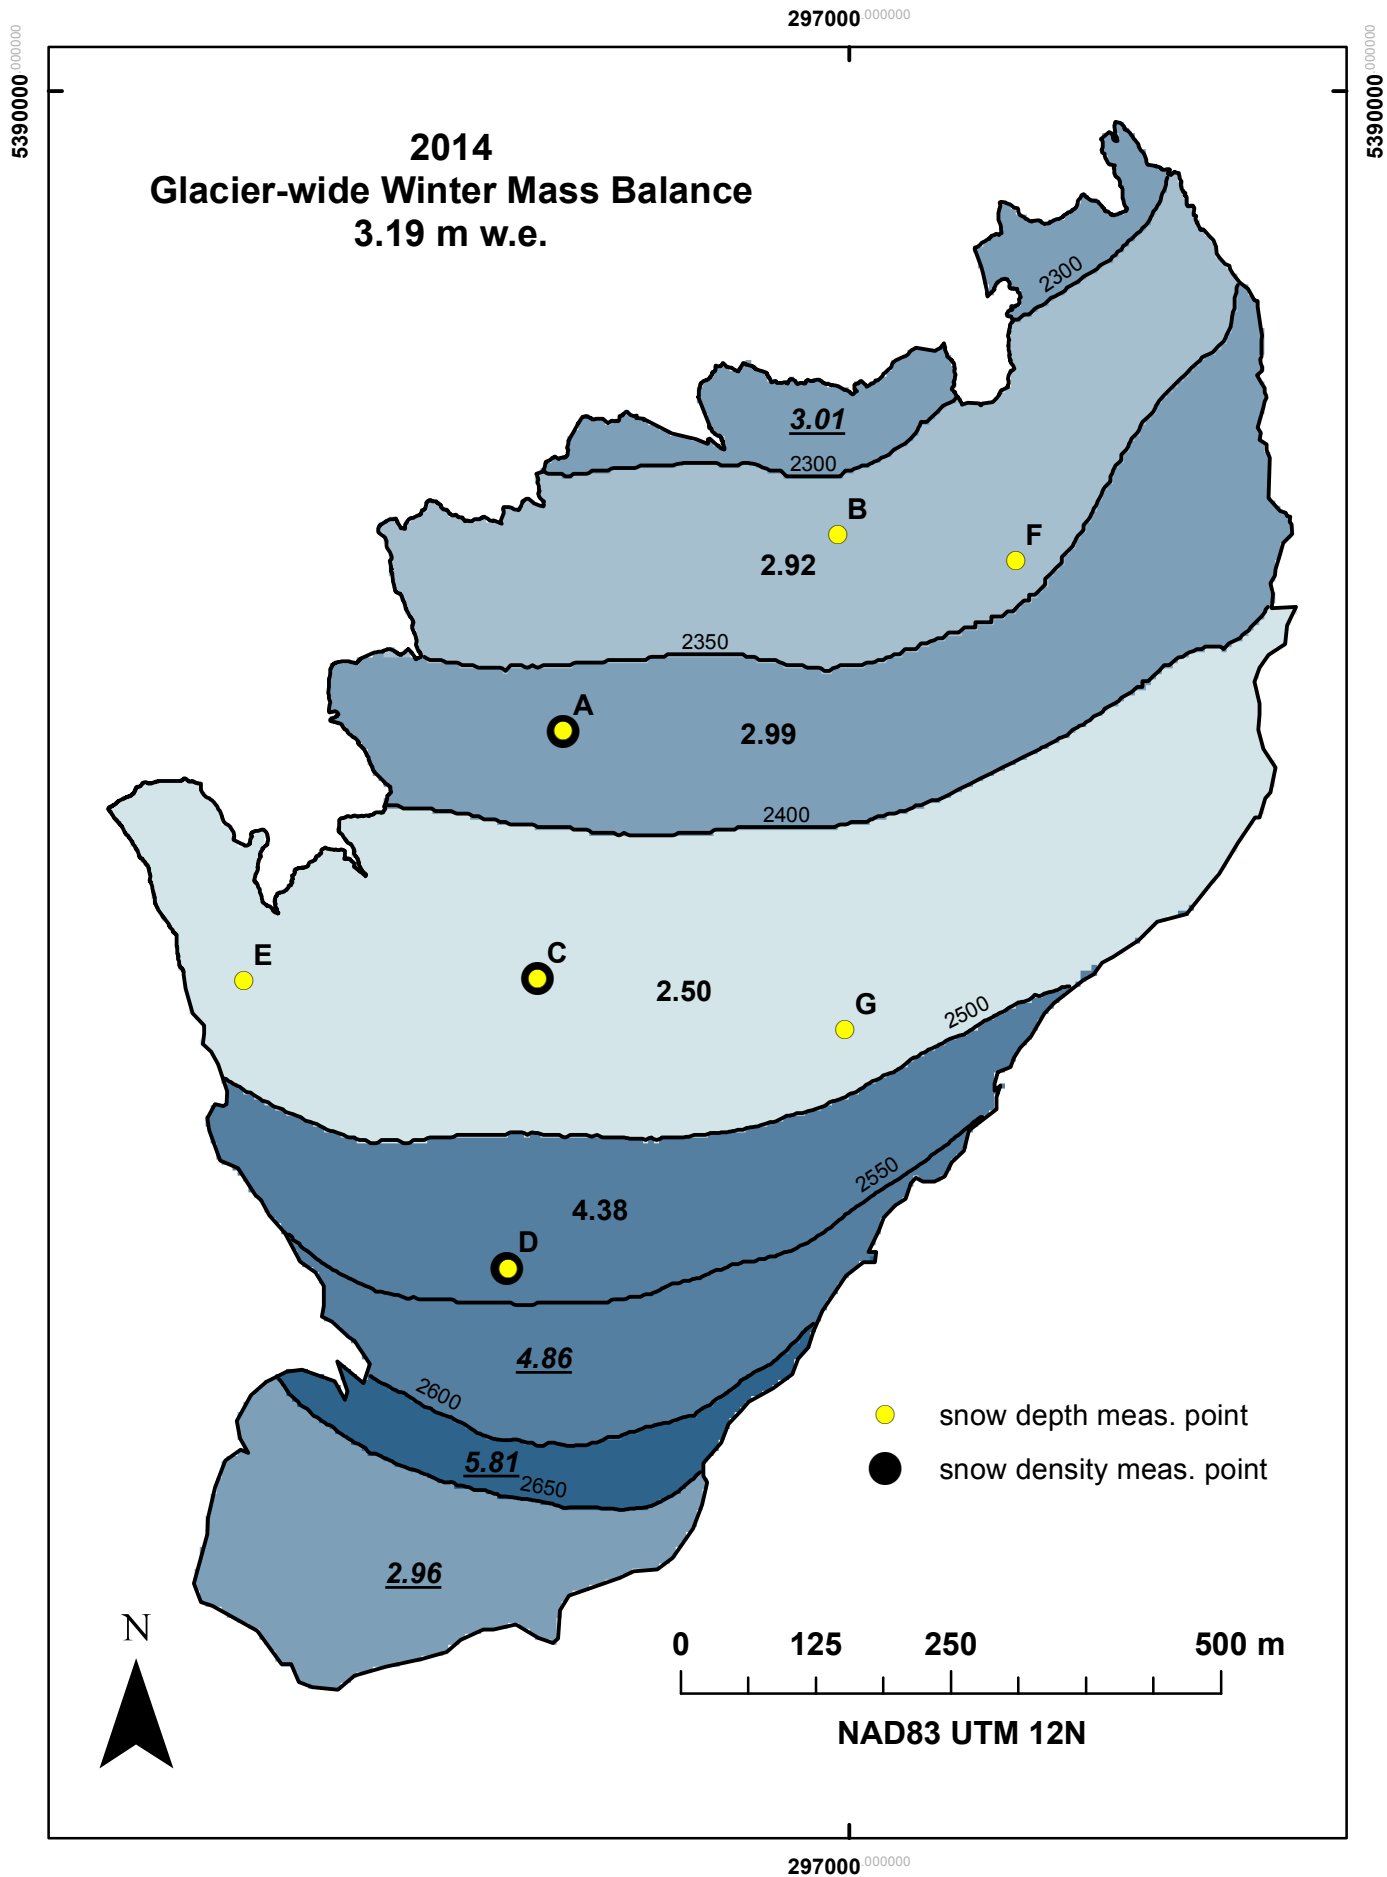

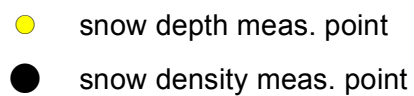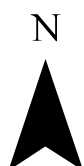

A horizontal scale bar with markings at 0, 125, 250, and 500 m. The bar is divided into segments by vertical tick marks. The labels 0, 125, 250, and 500 m are placed above the corresponding tick marks.

**NAD 83 UTM 12N**

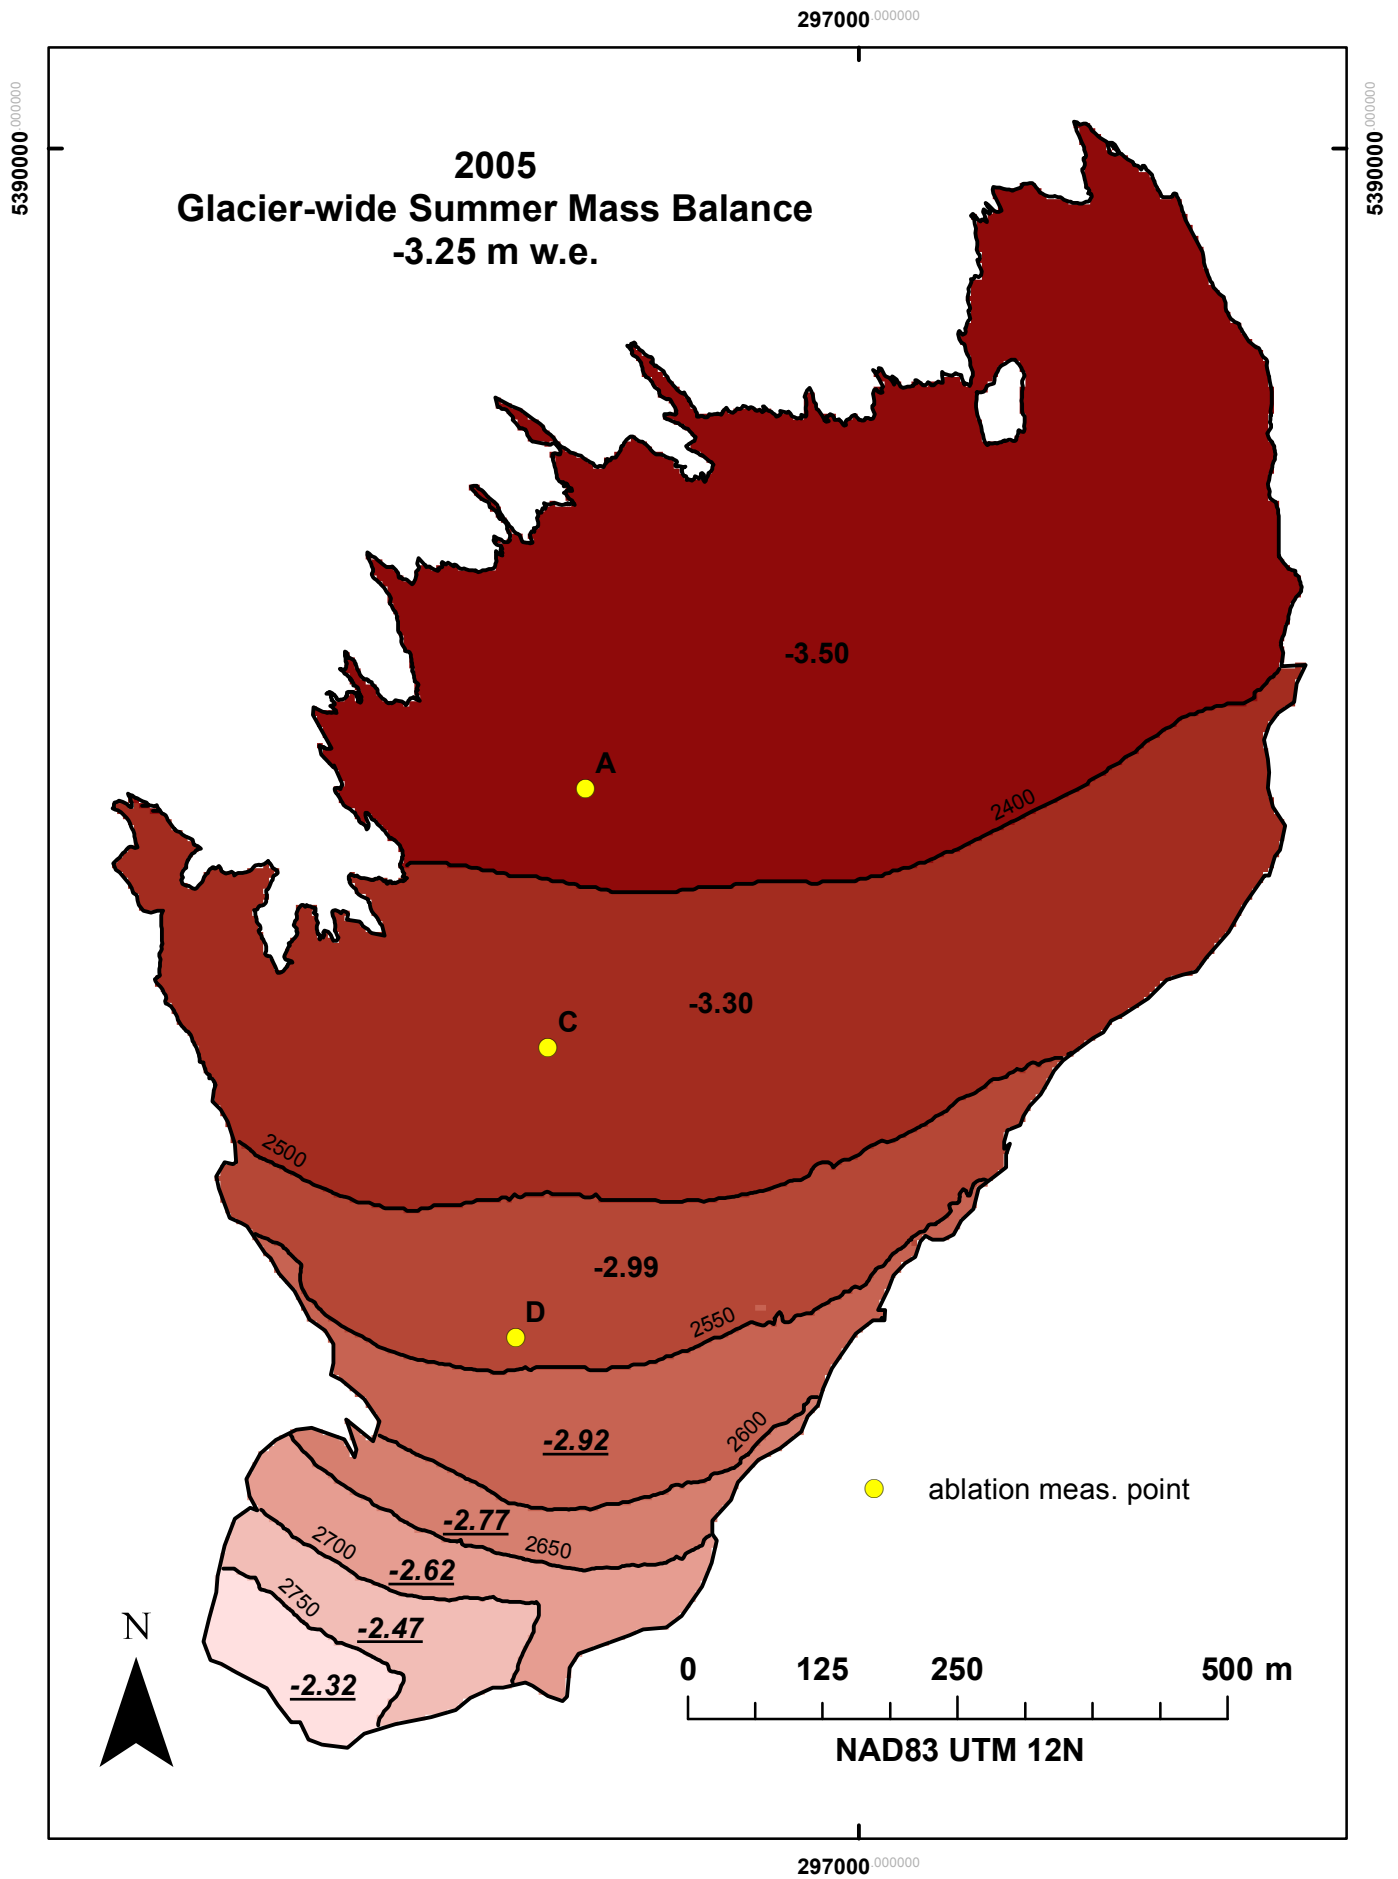

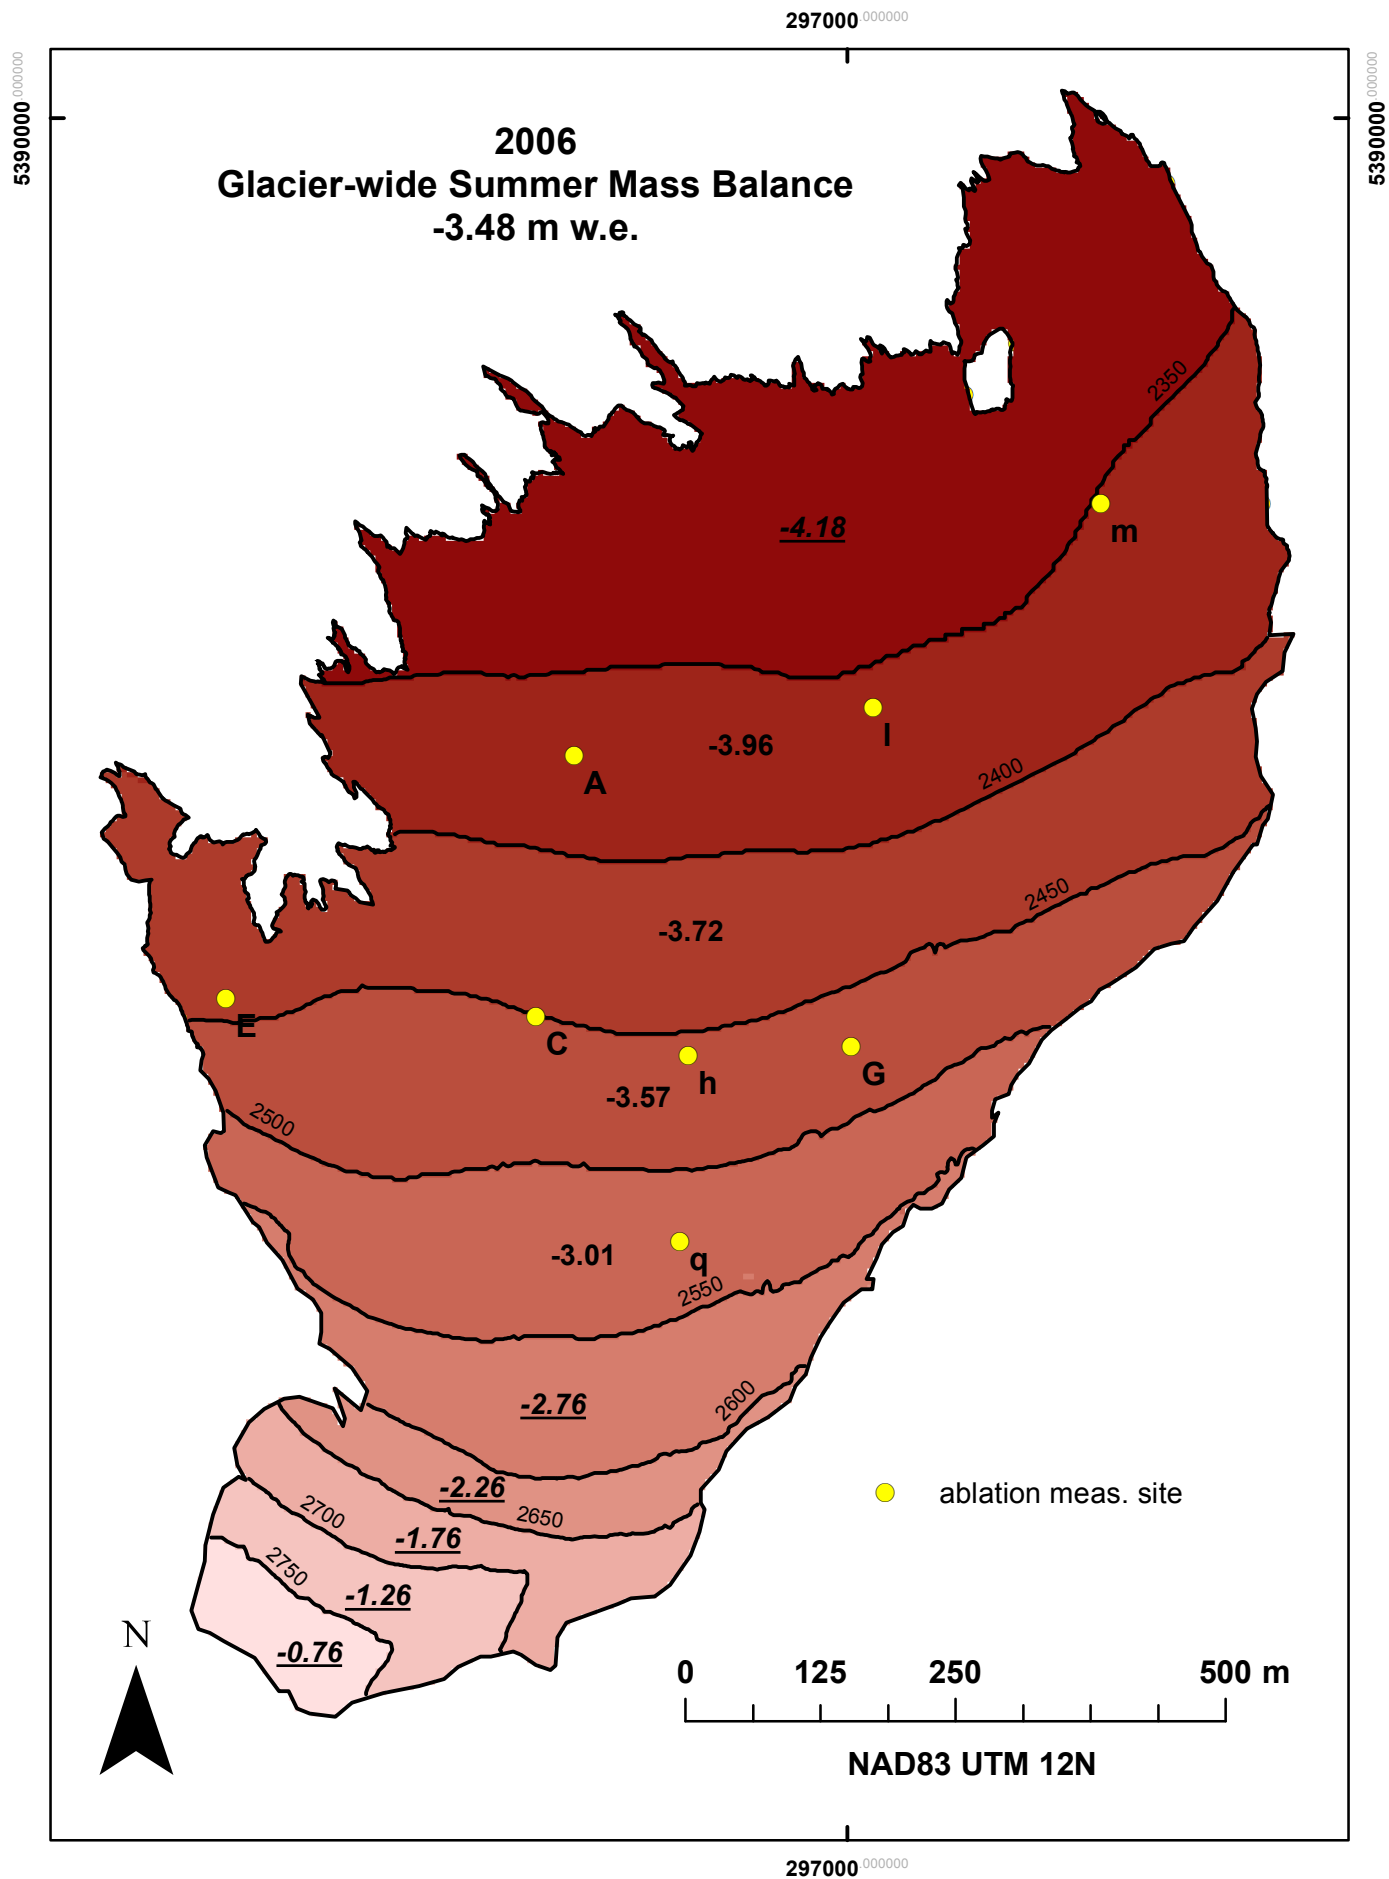

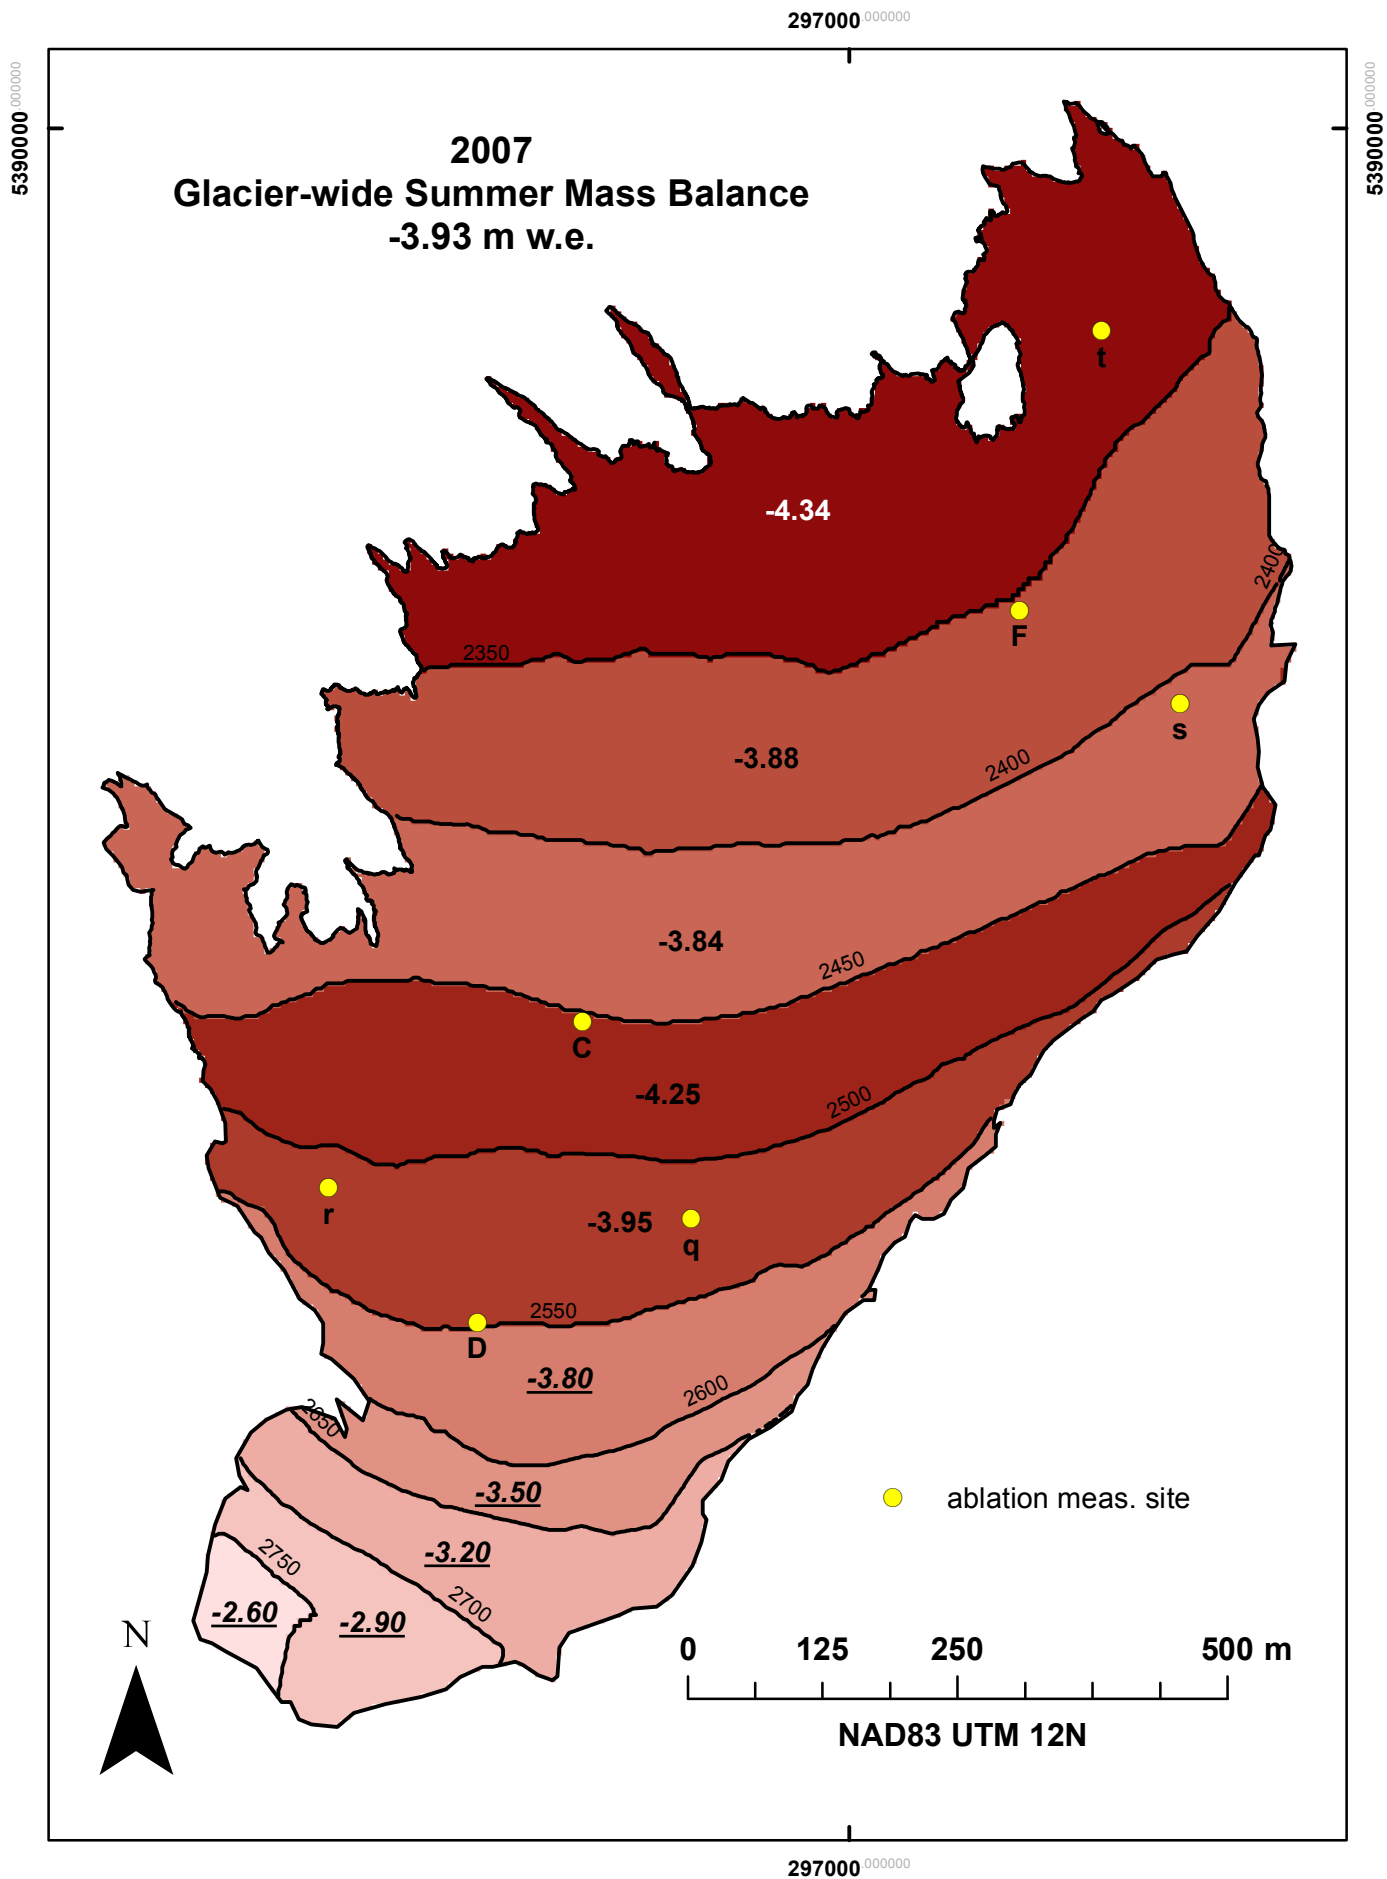

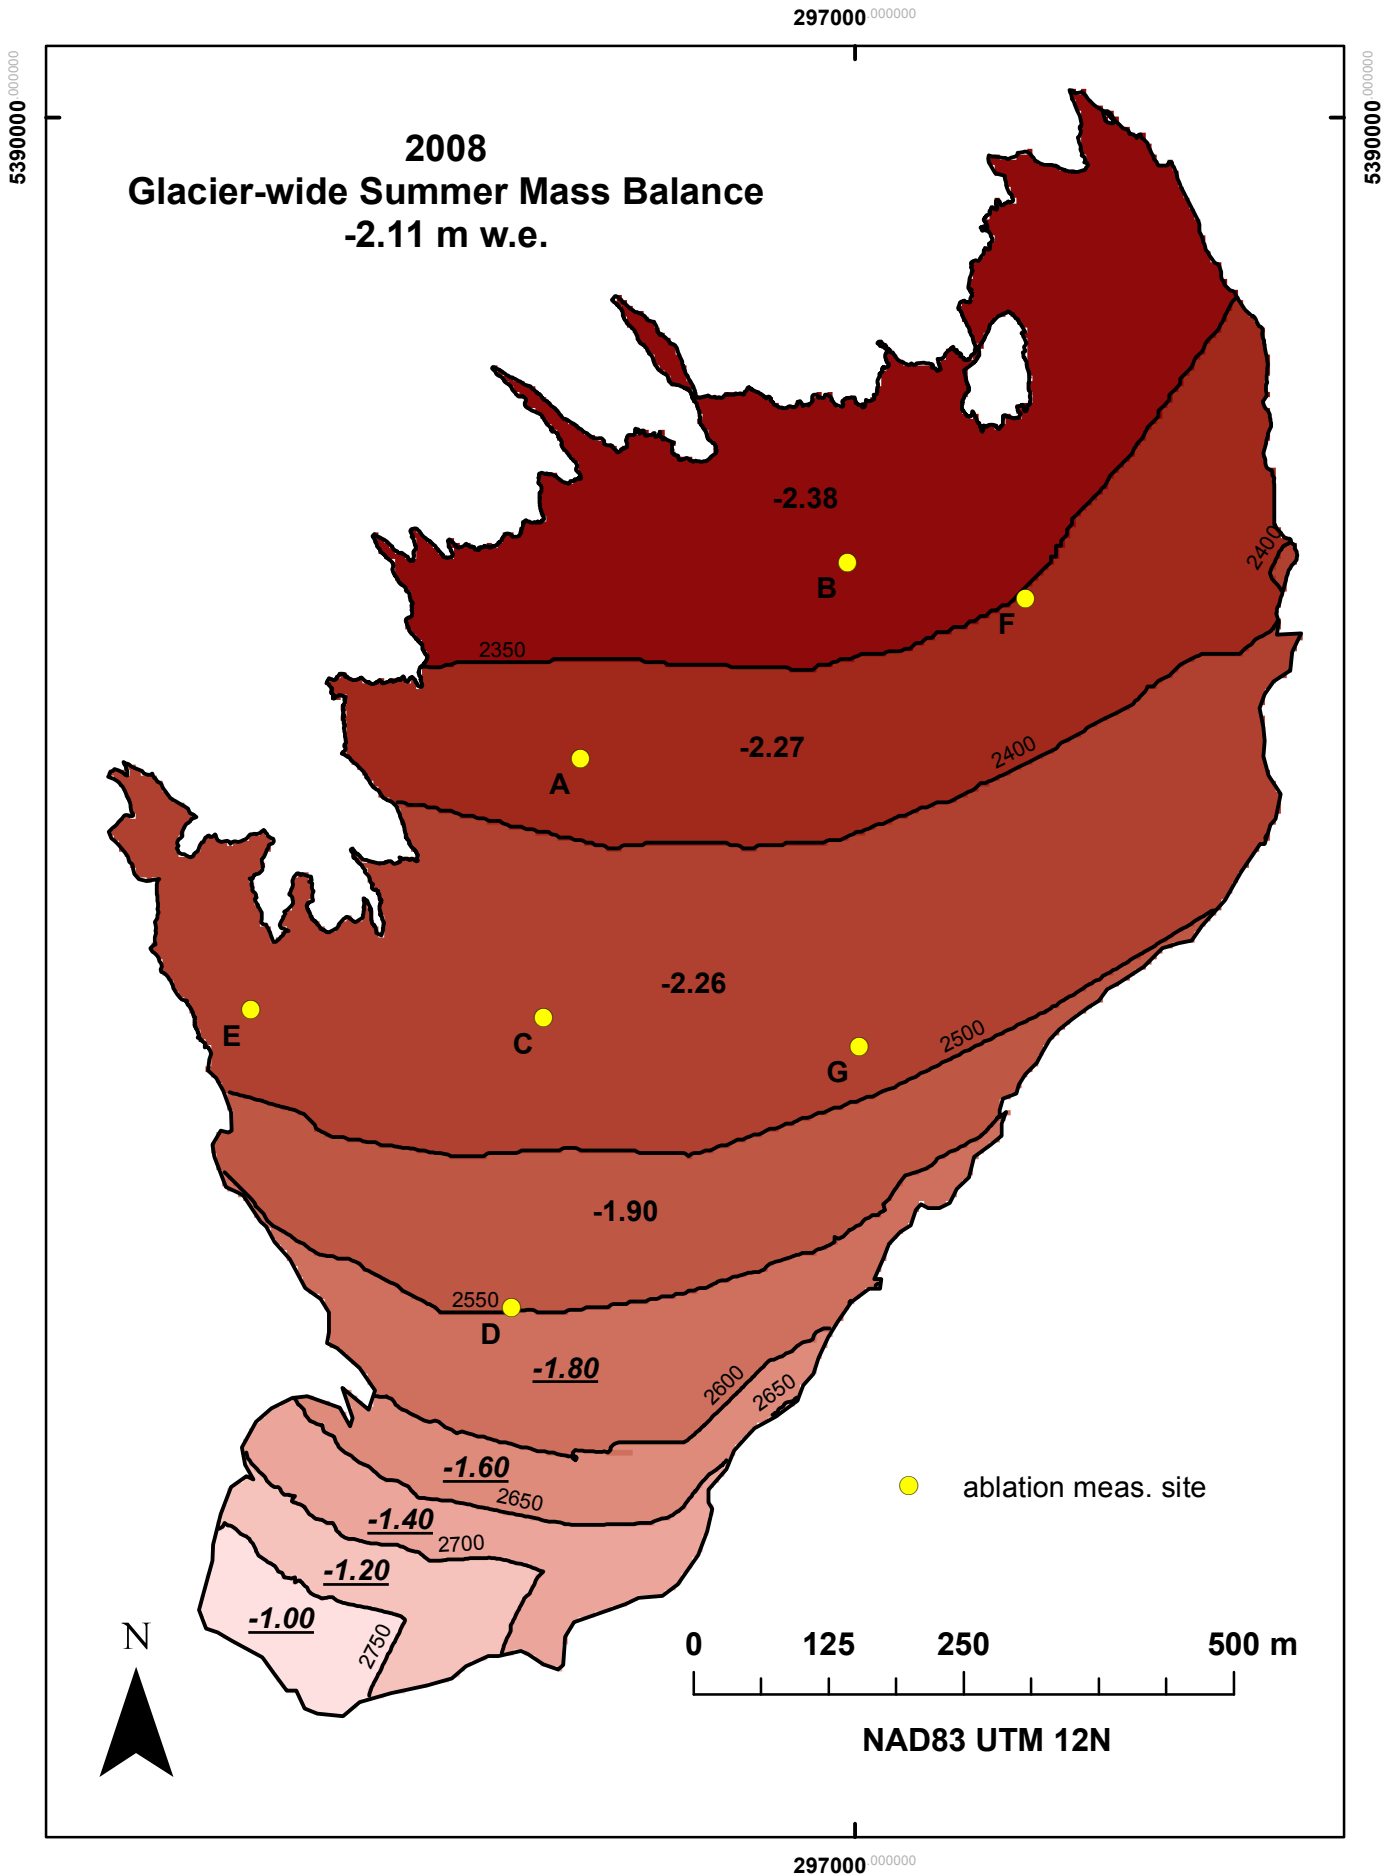

5390000 000000

297000 000000

5390000 000000

**2009**  
**Glacier-wide Summer Mass Balance**  
**-3.86 m w.e.**

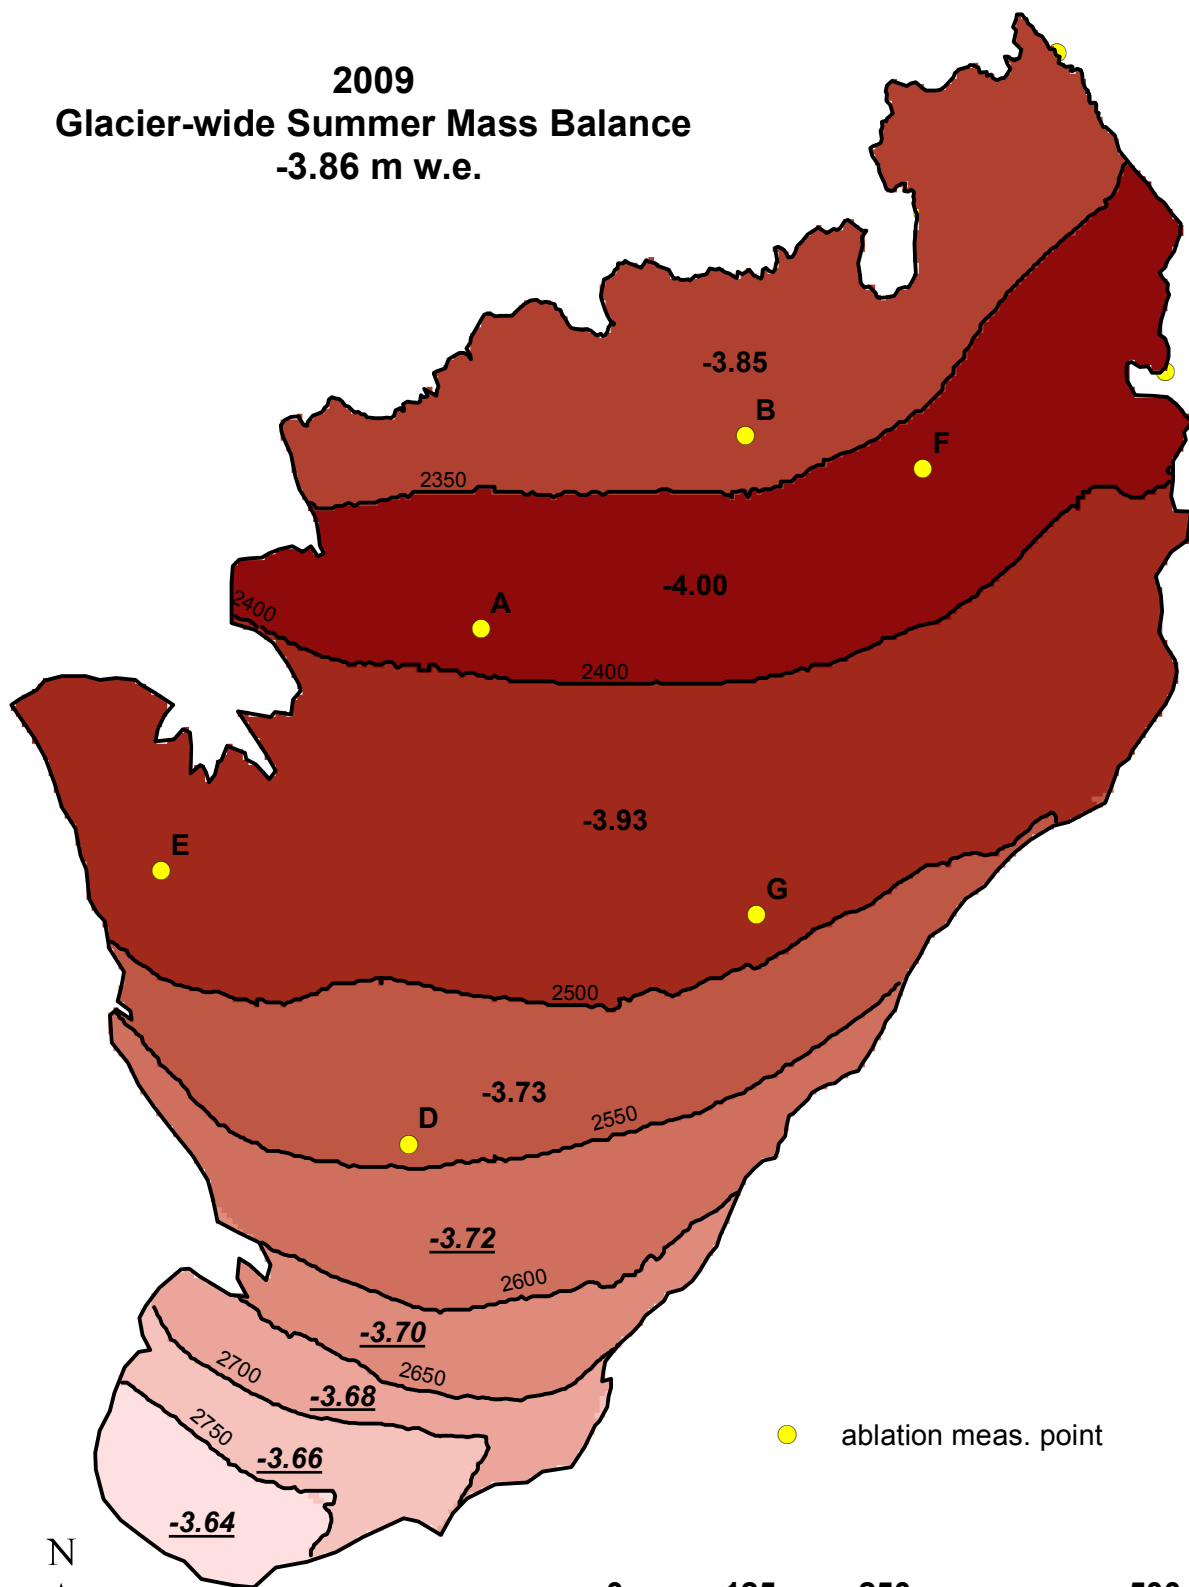

● ablation meas. point

0 125 250 500 m

NAD83 UTM 12N

297000 000000



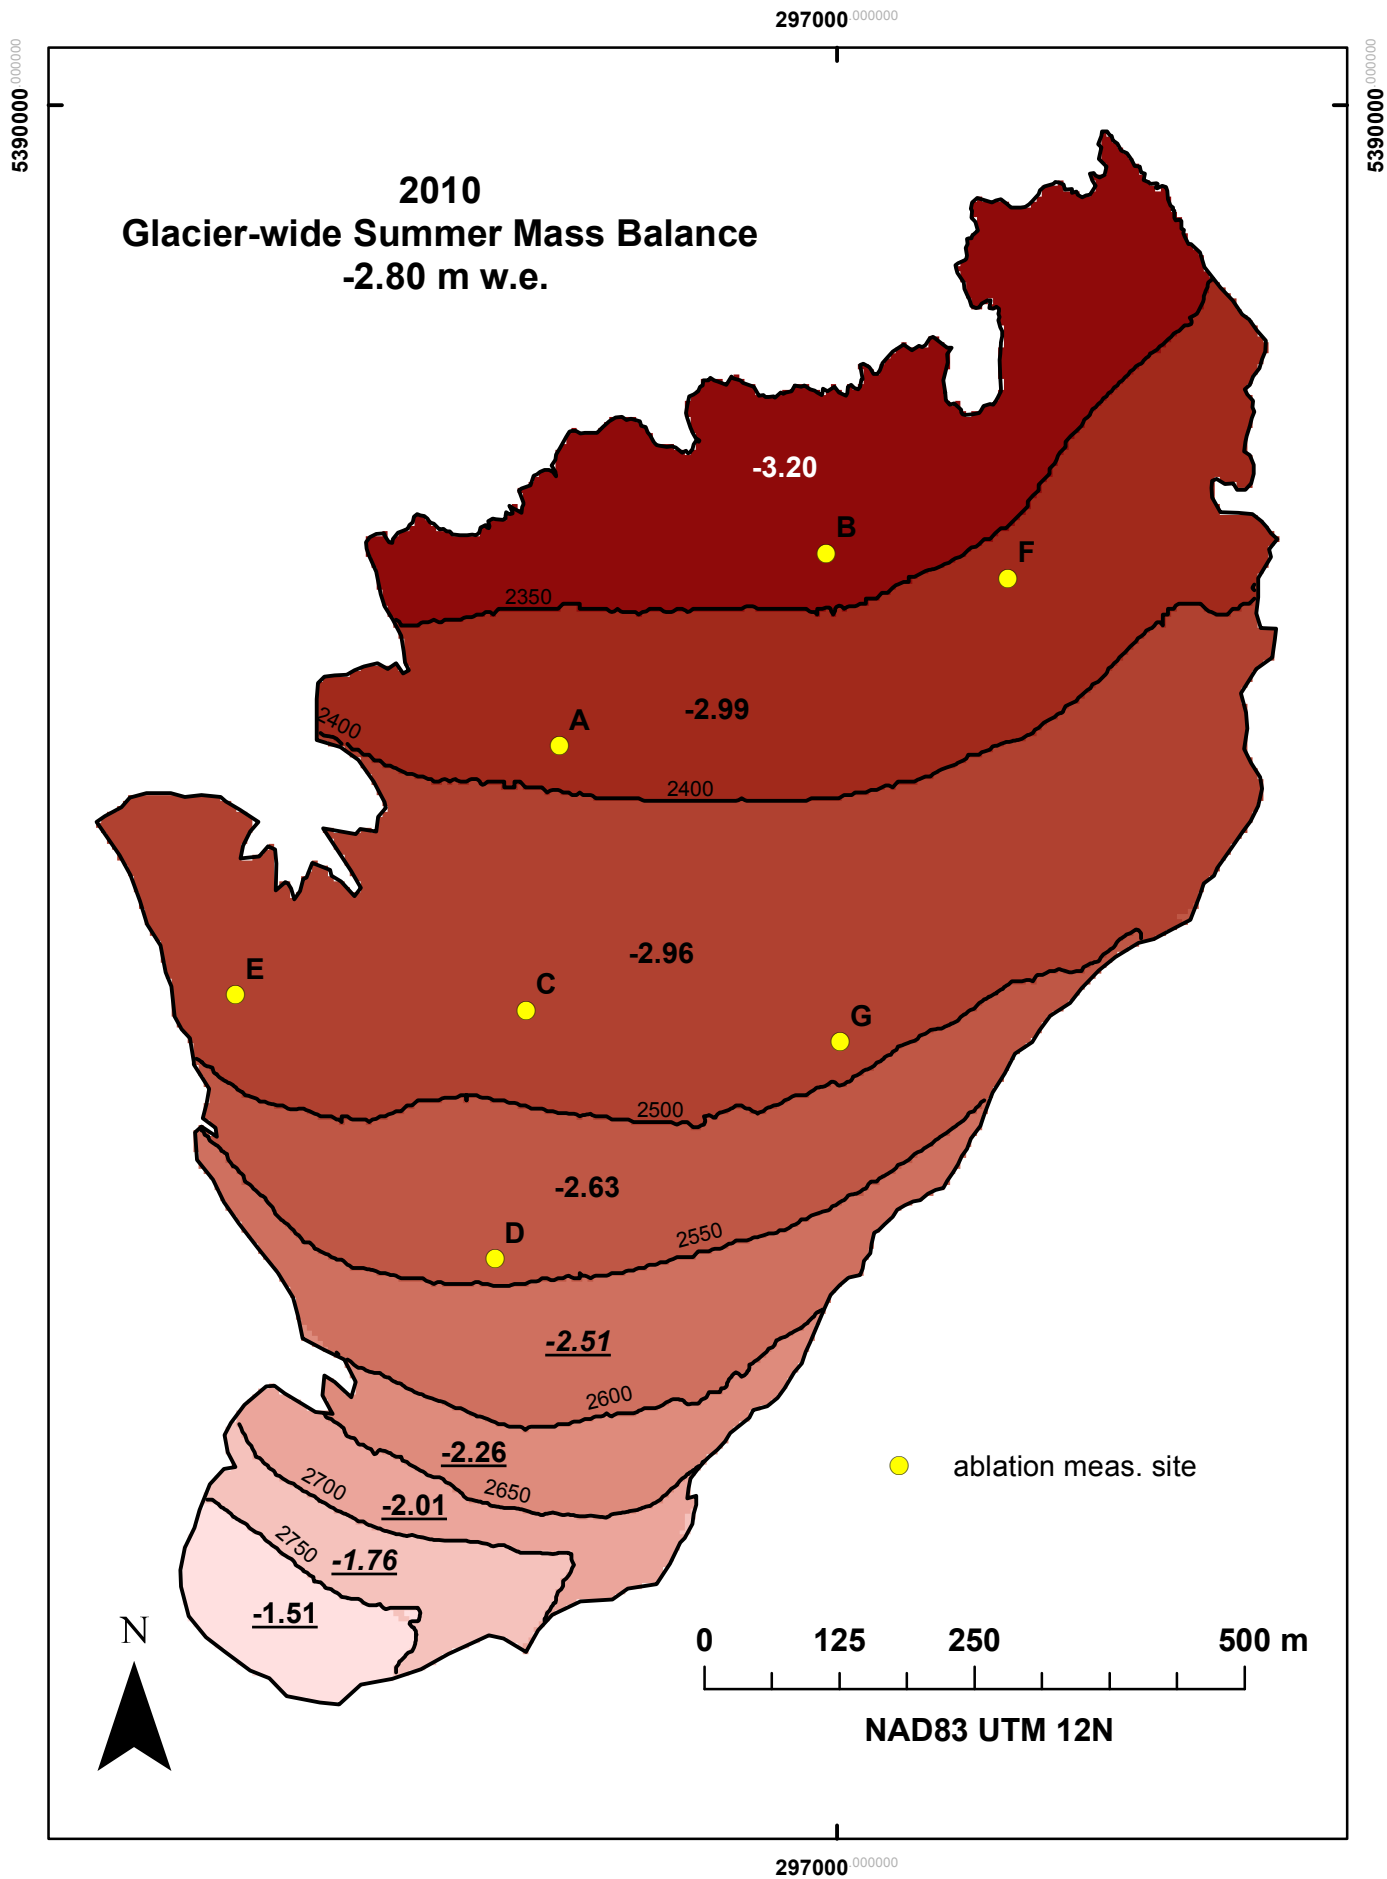

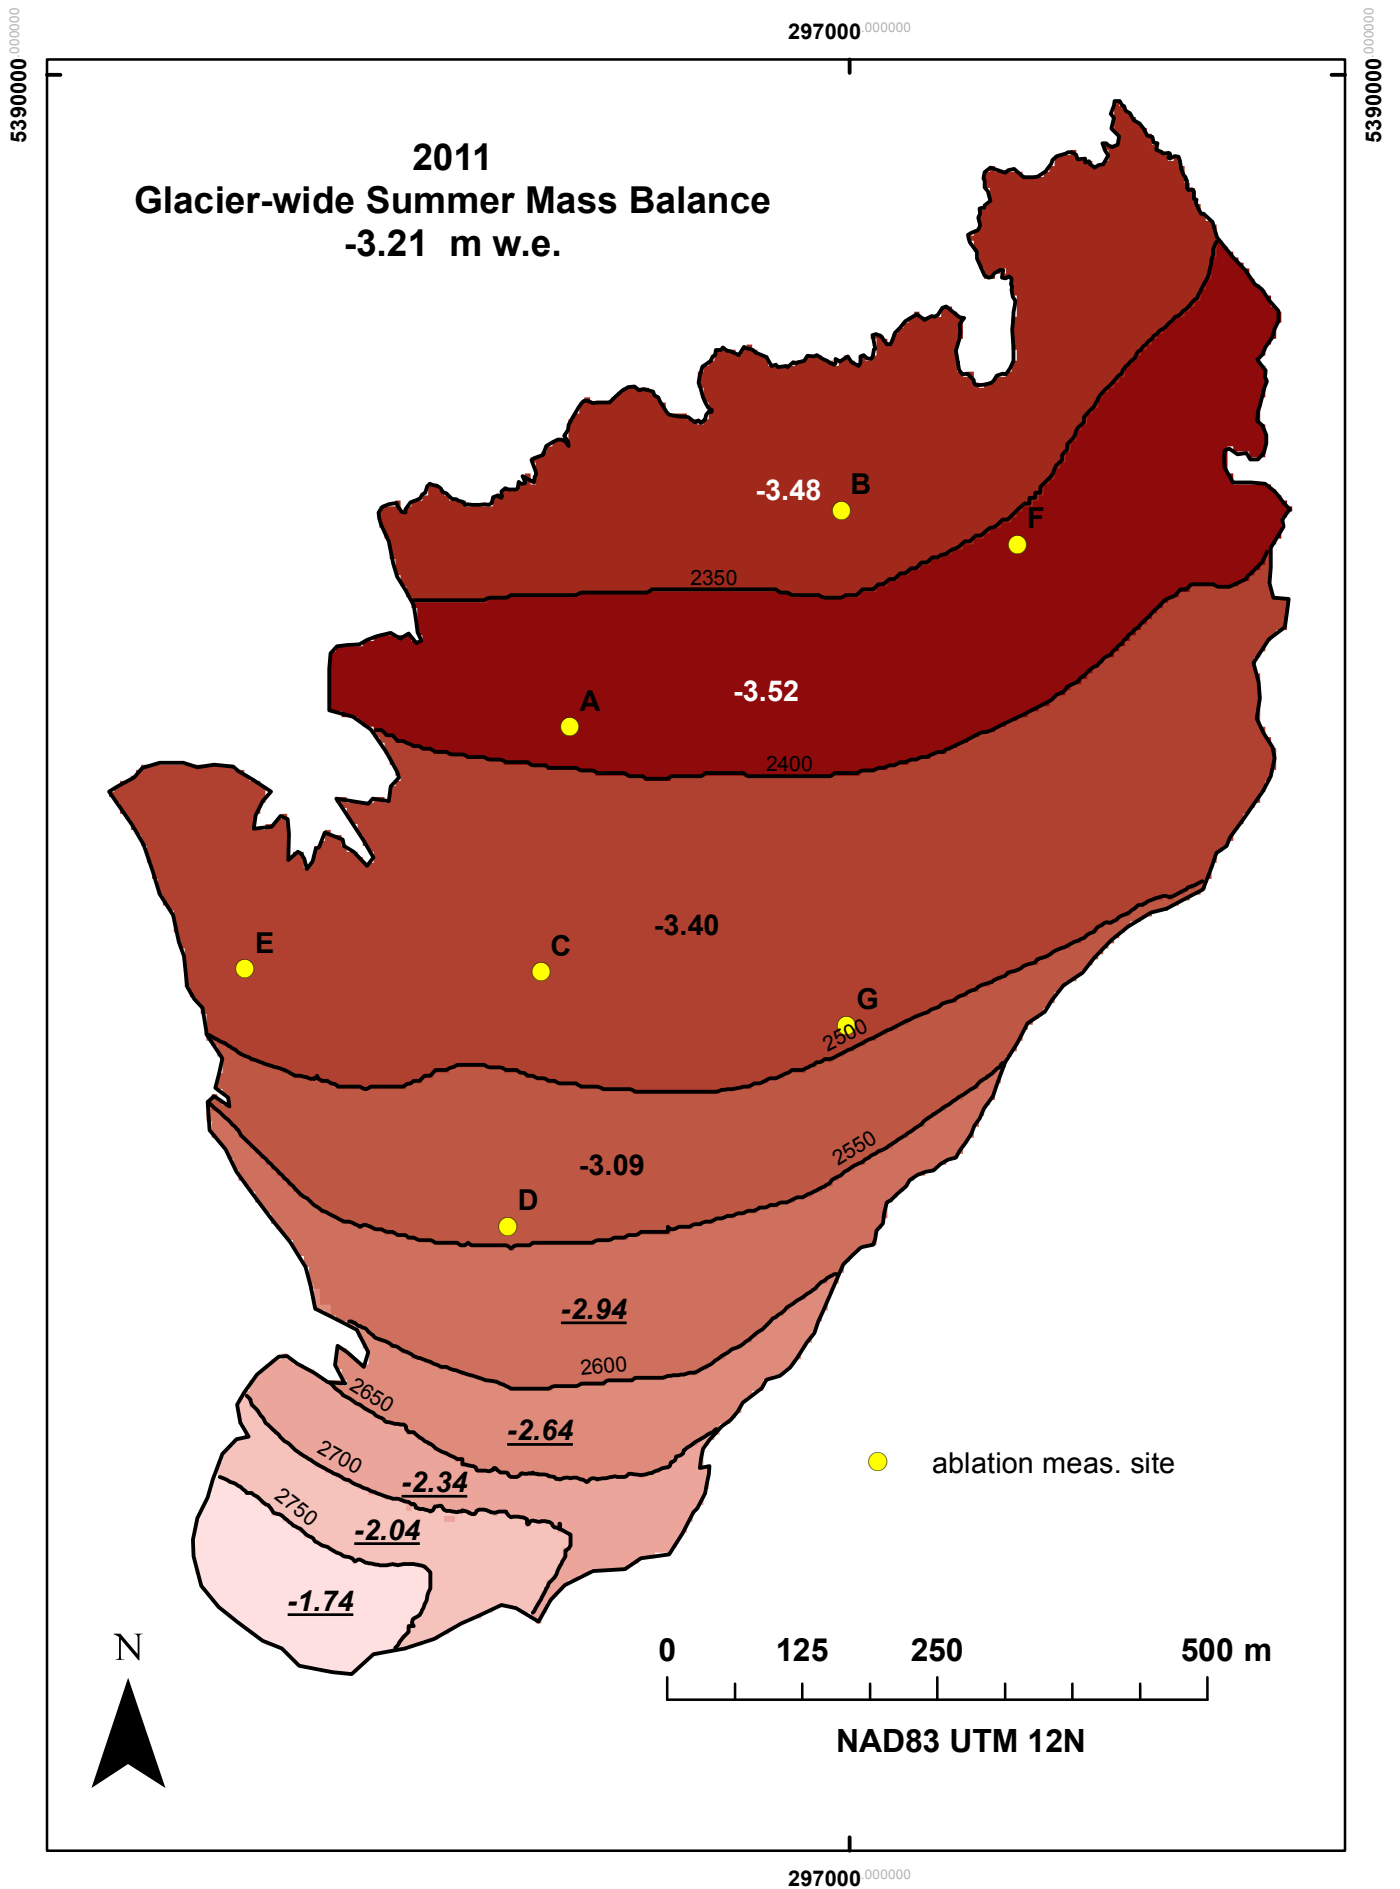

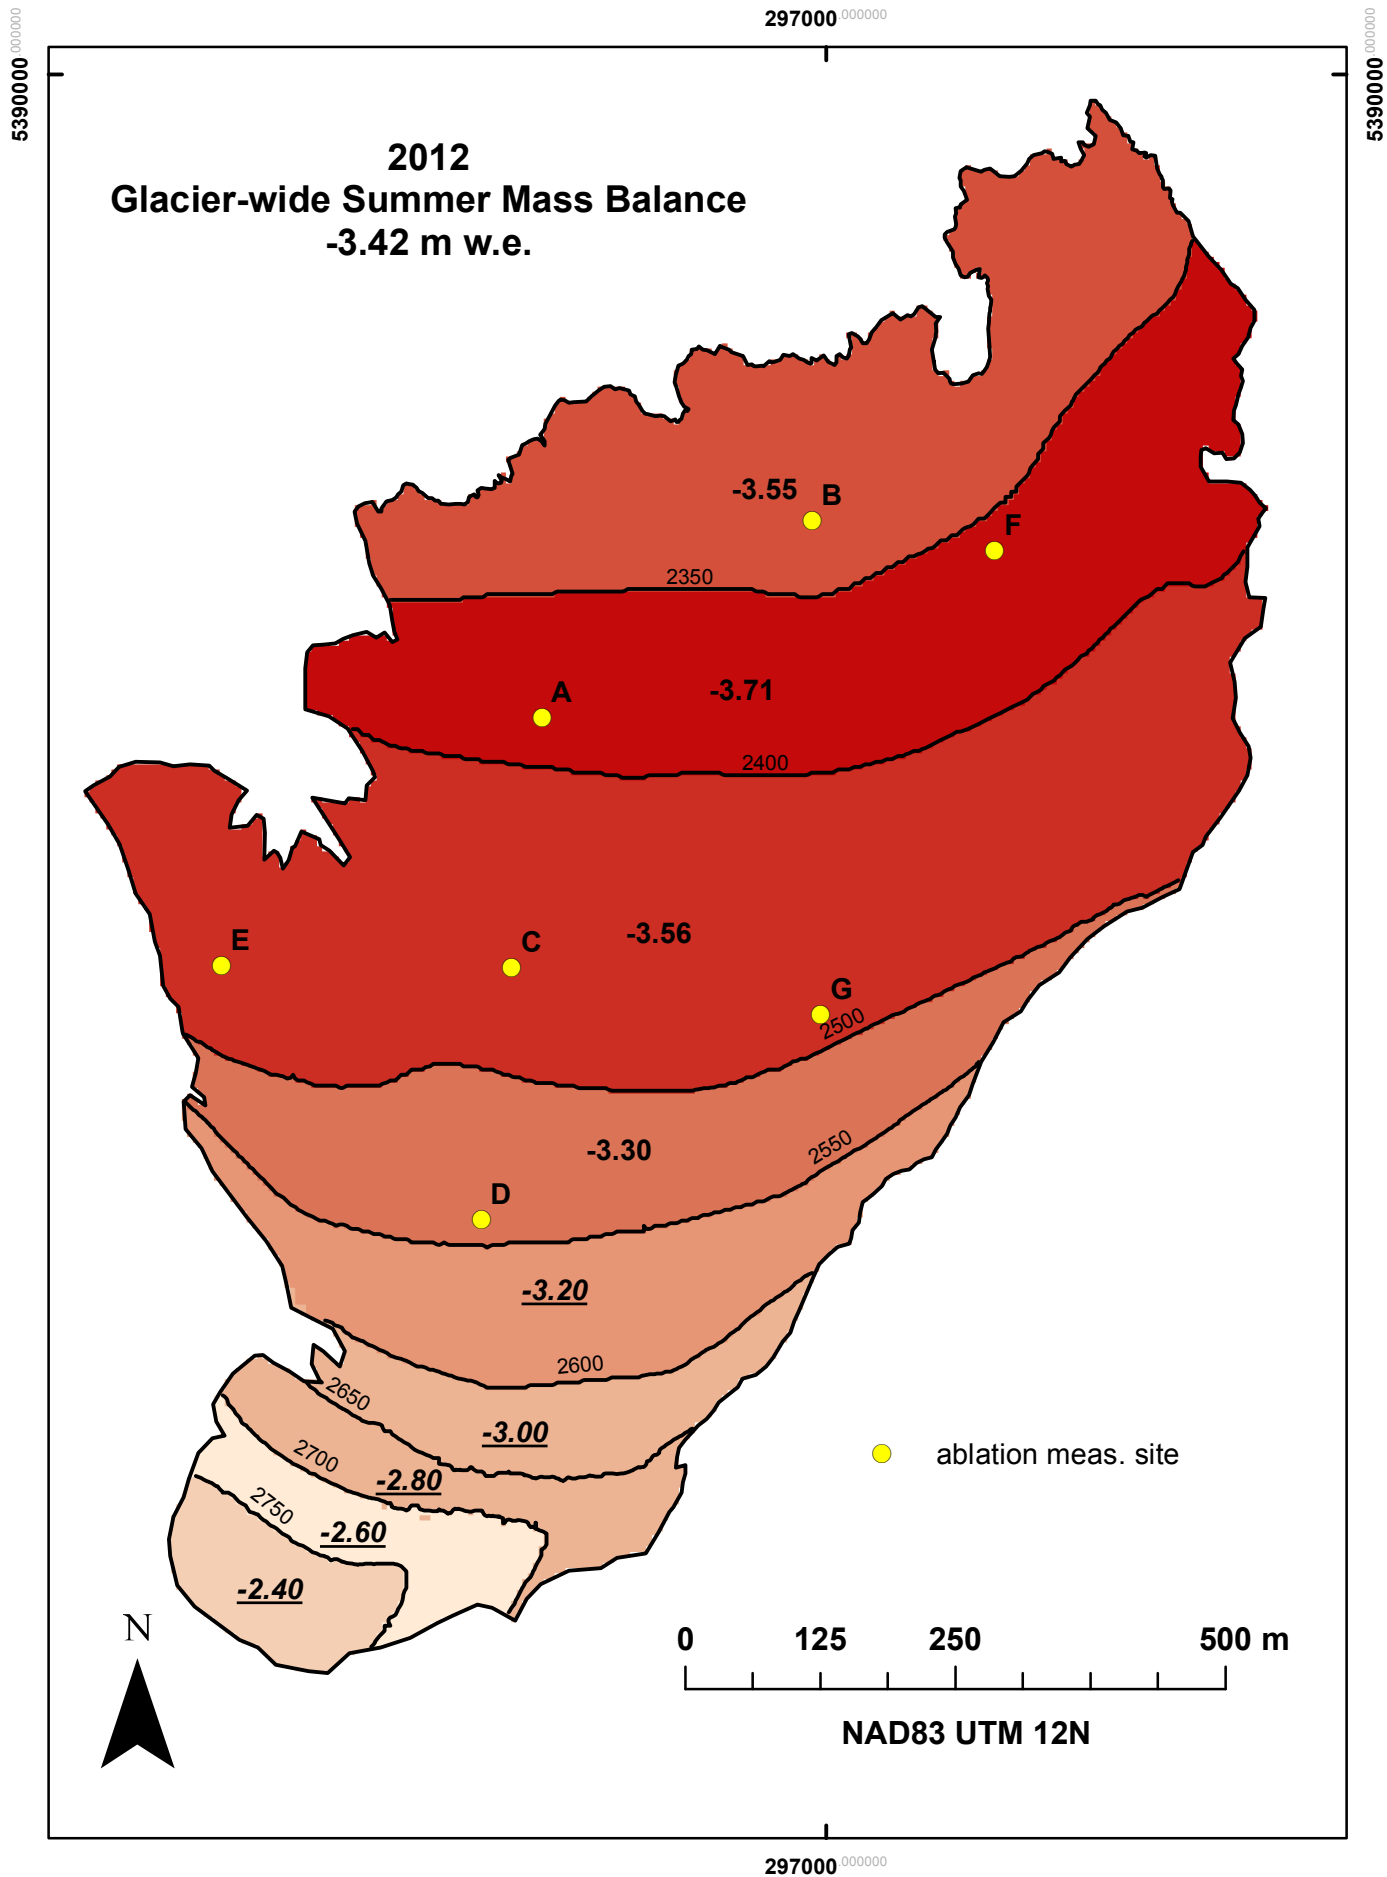

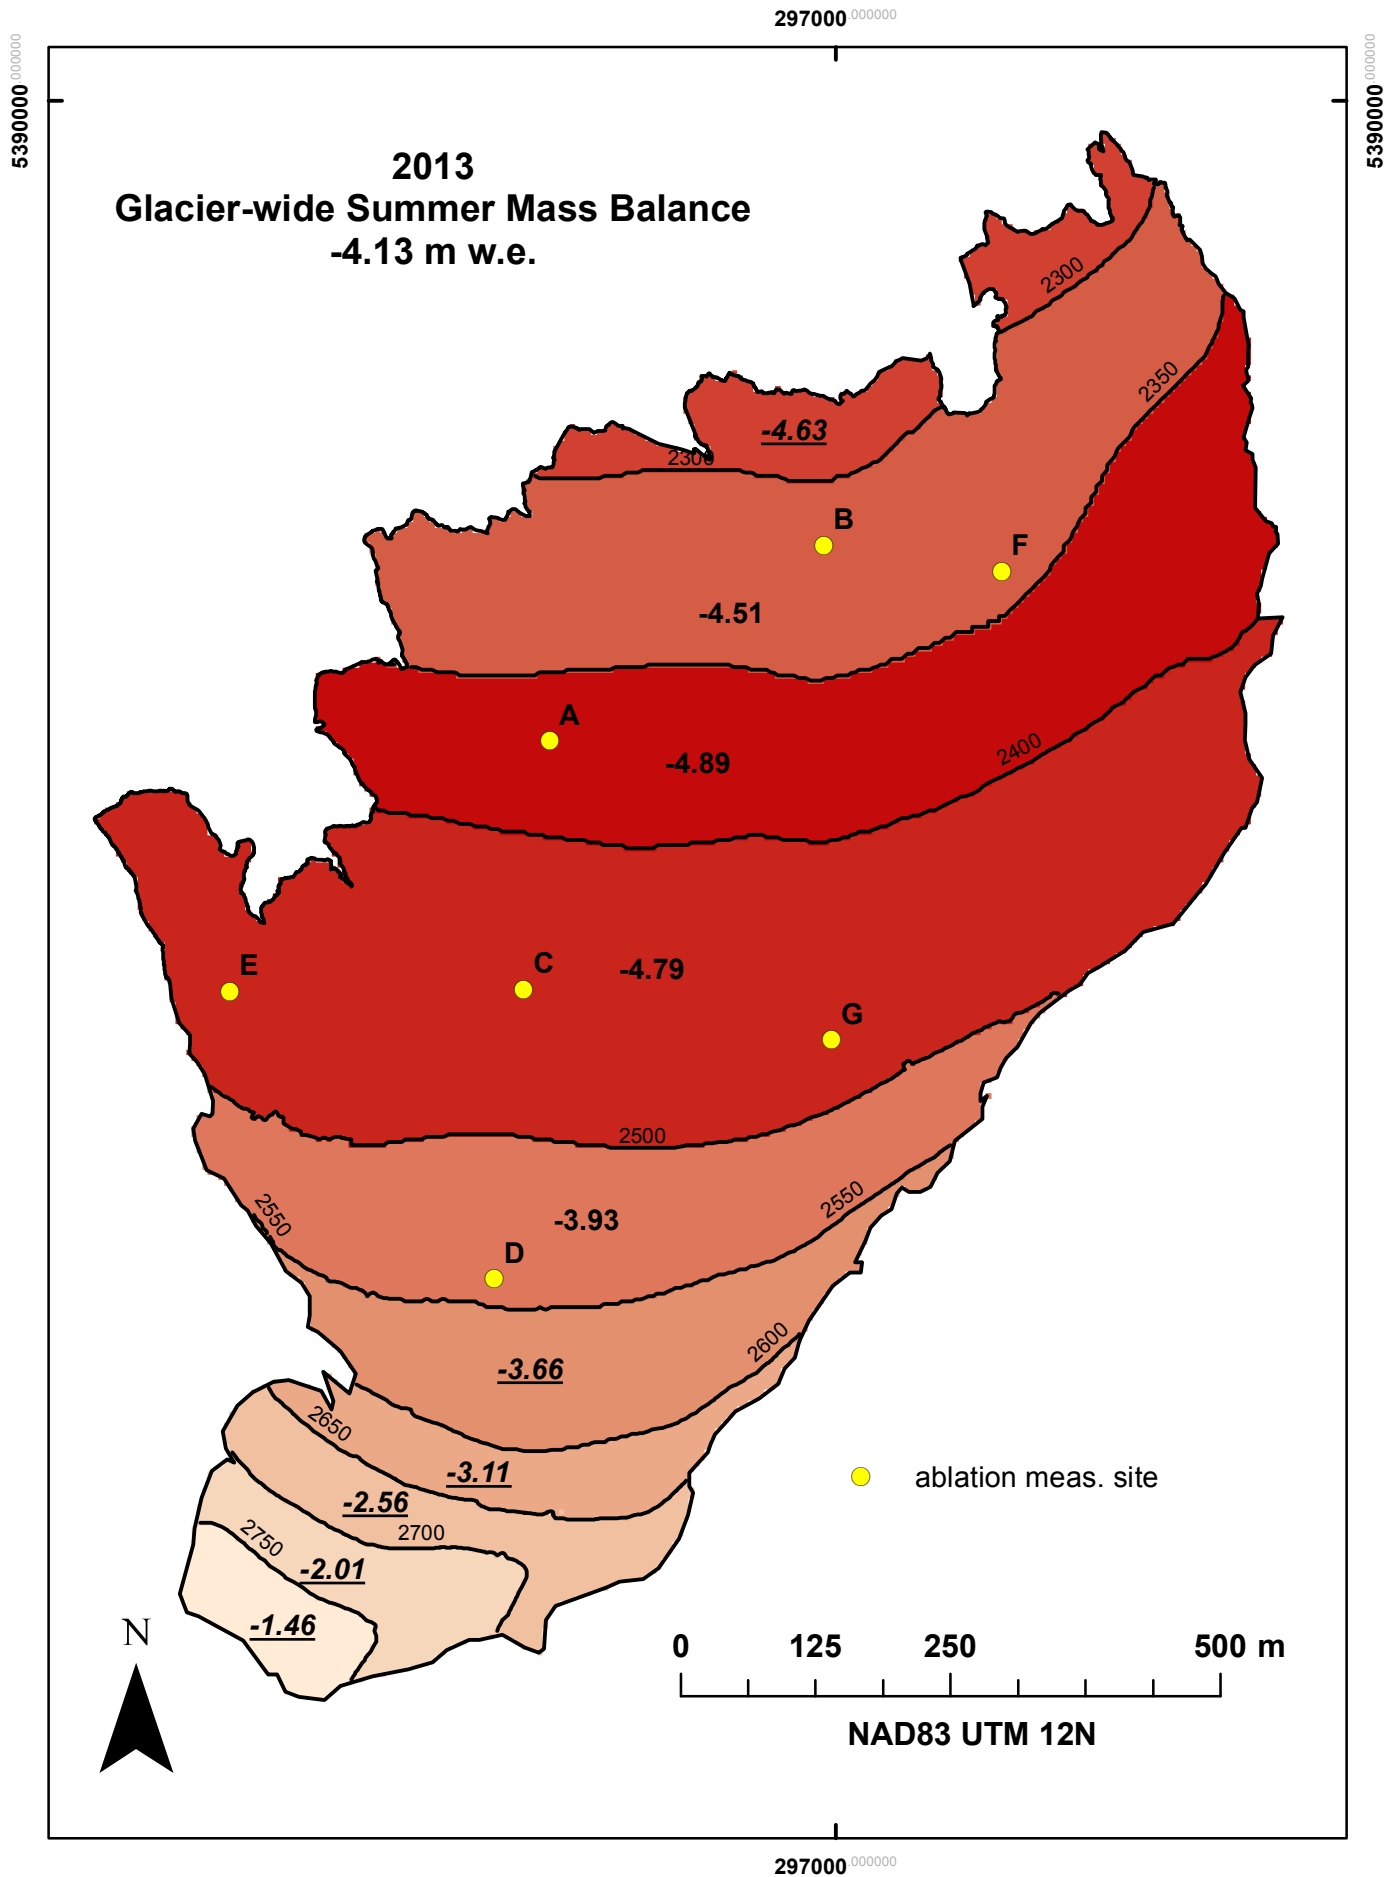

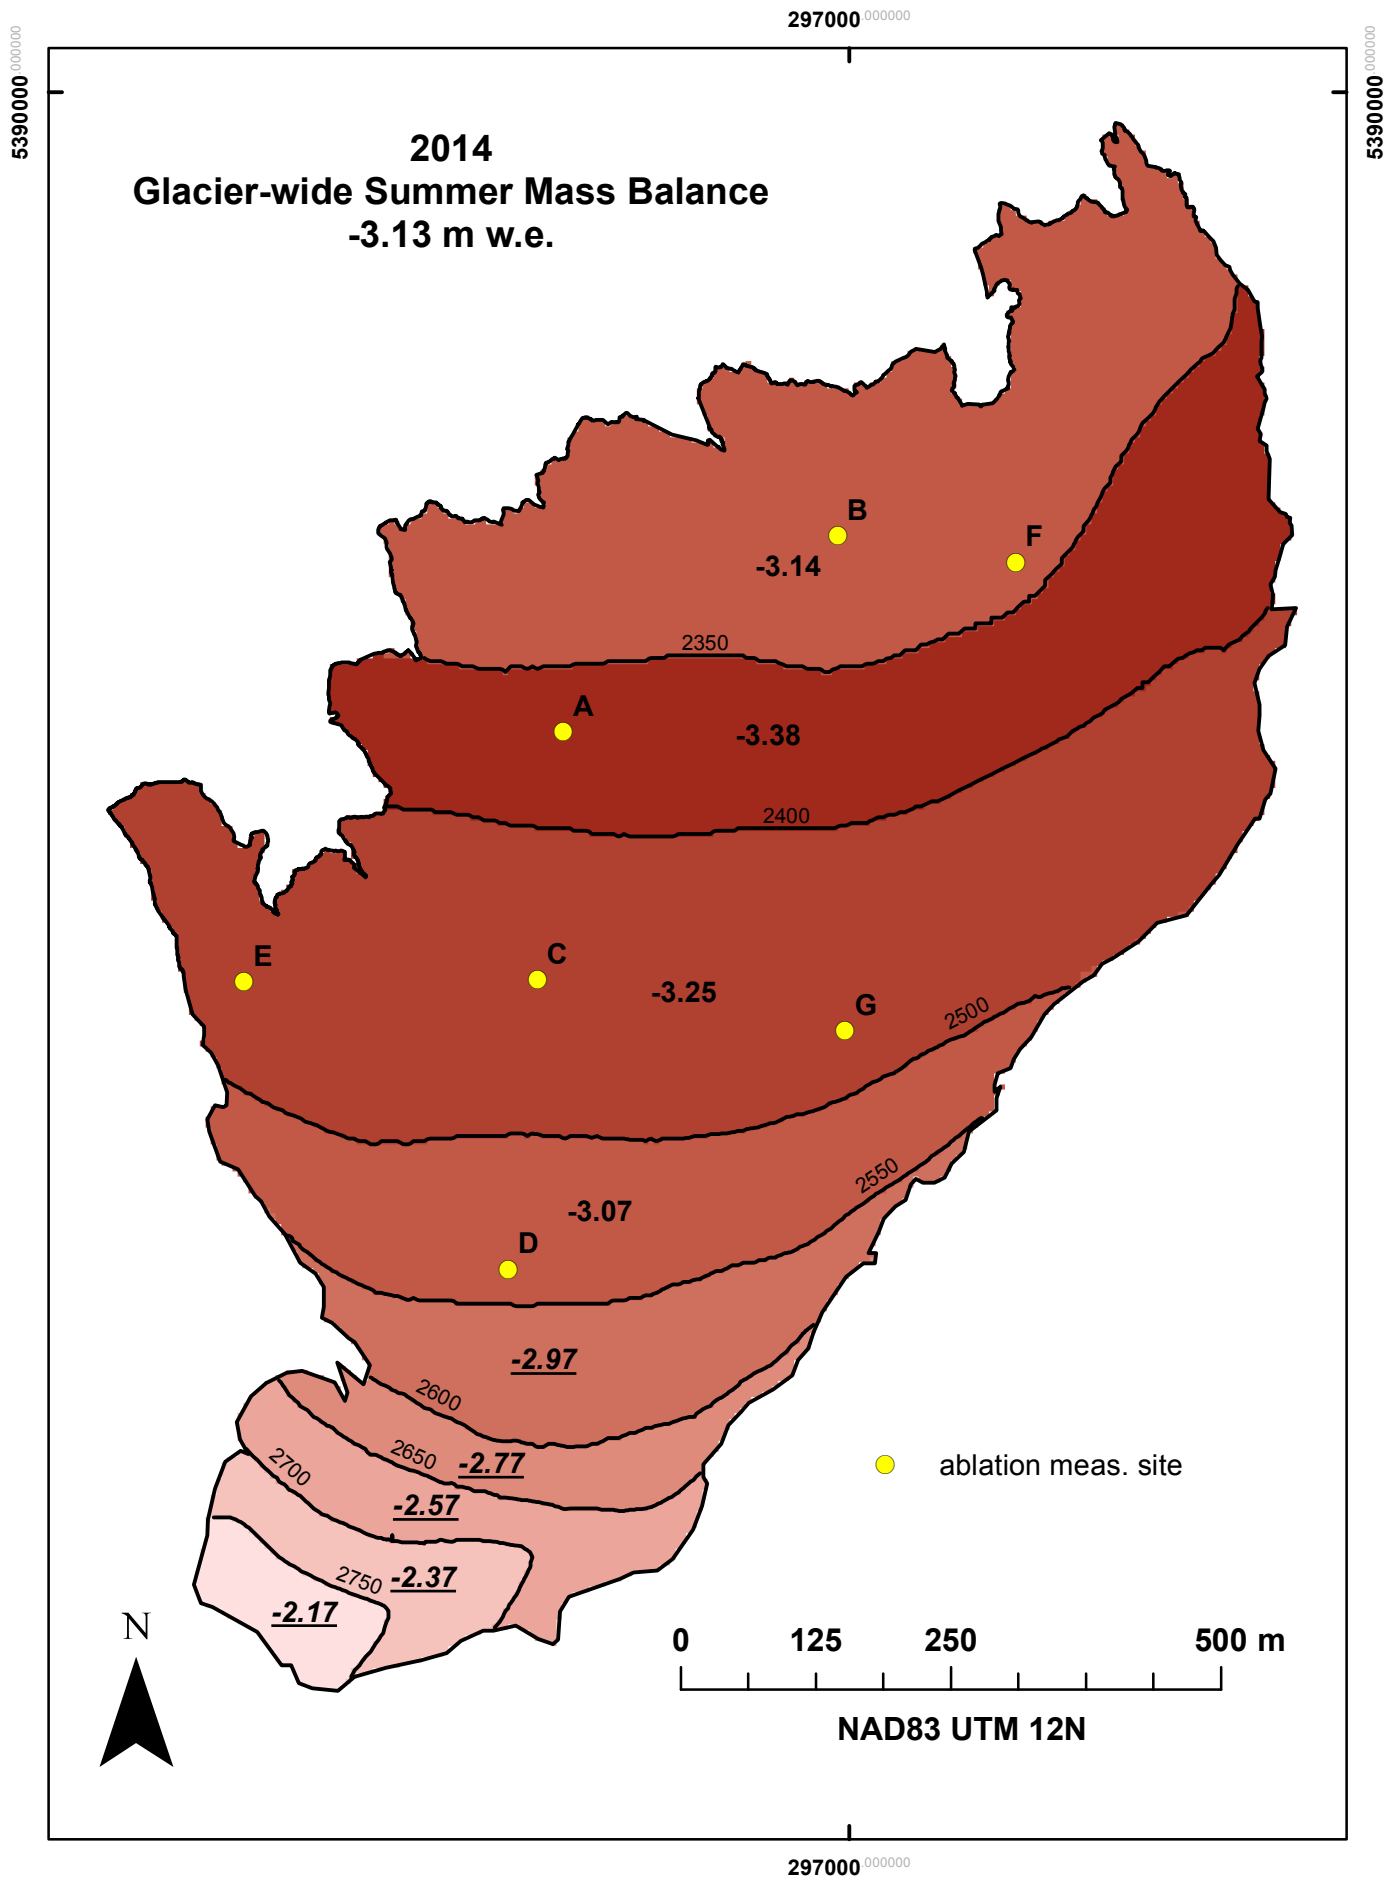

297000 000000

**2015  
Glacier-wide Summer Mass Balance  
-4.01**

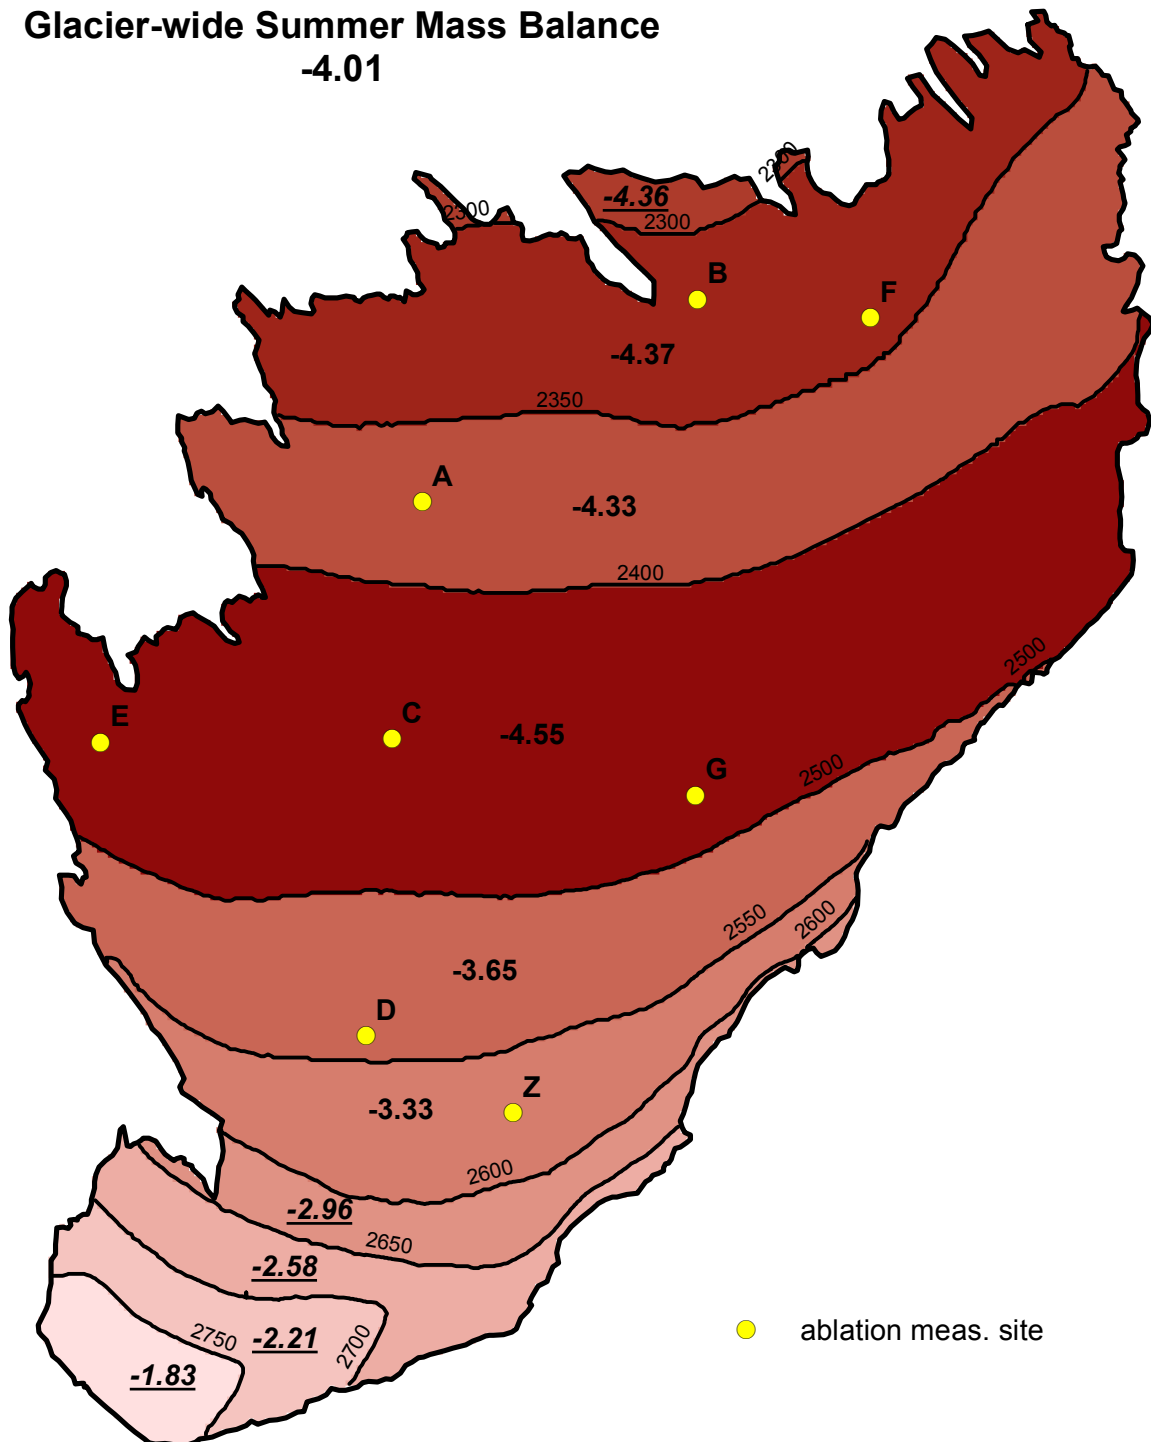

● ablation meas. site

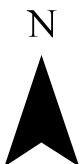

0 125 250 500 m

NAD 83 UTM 12N

297000 000000

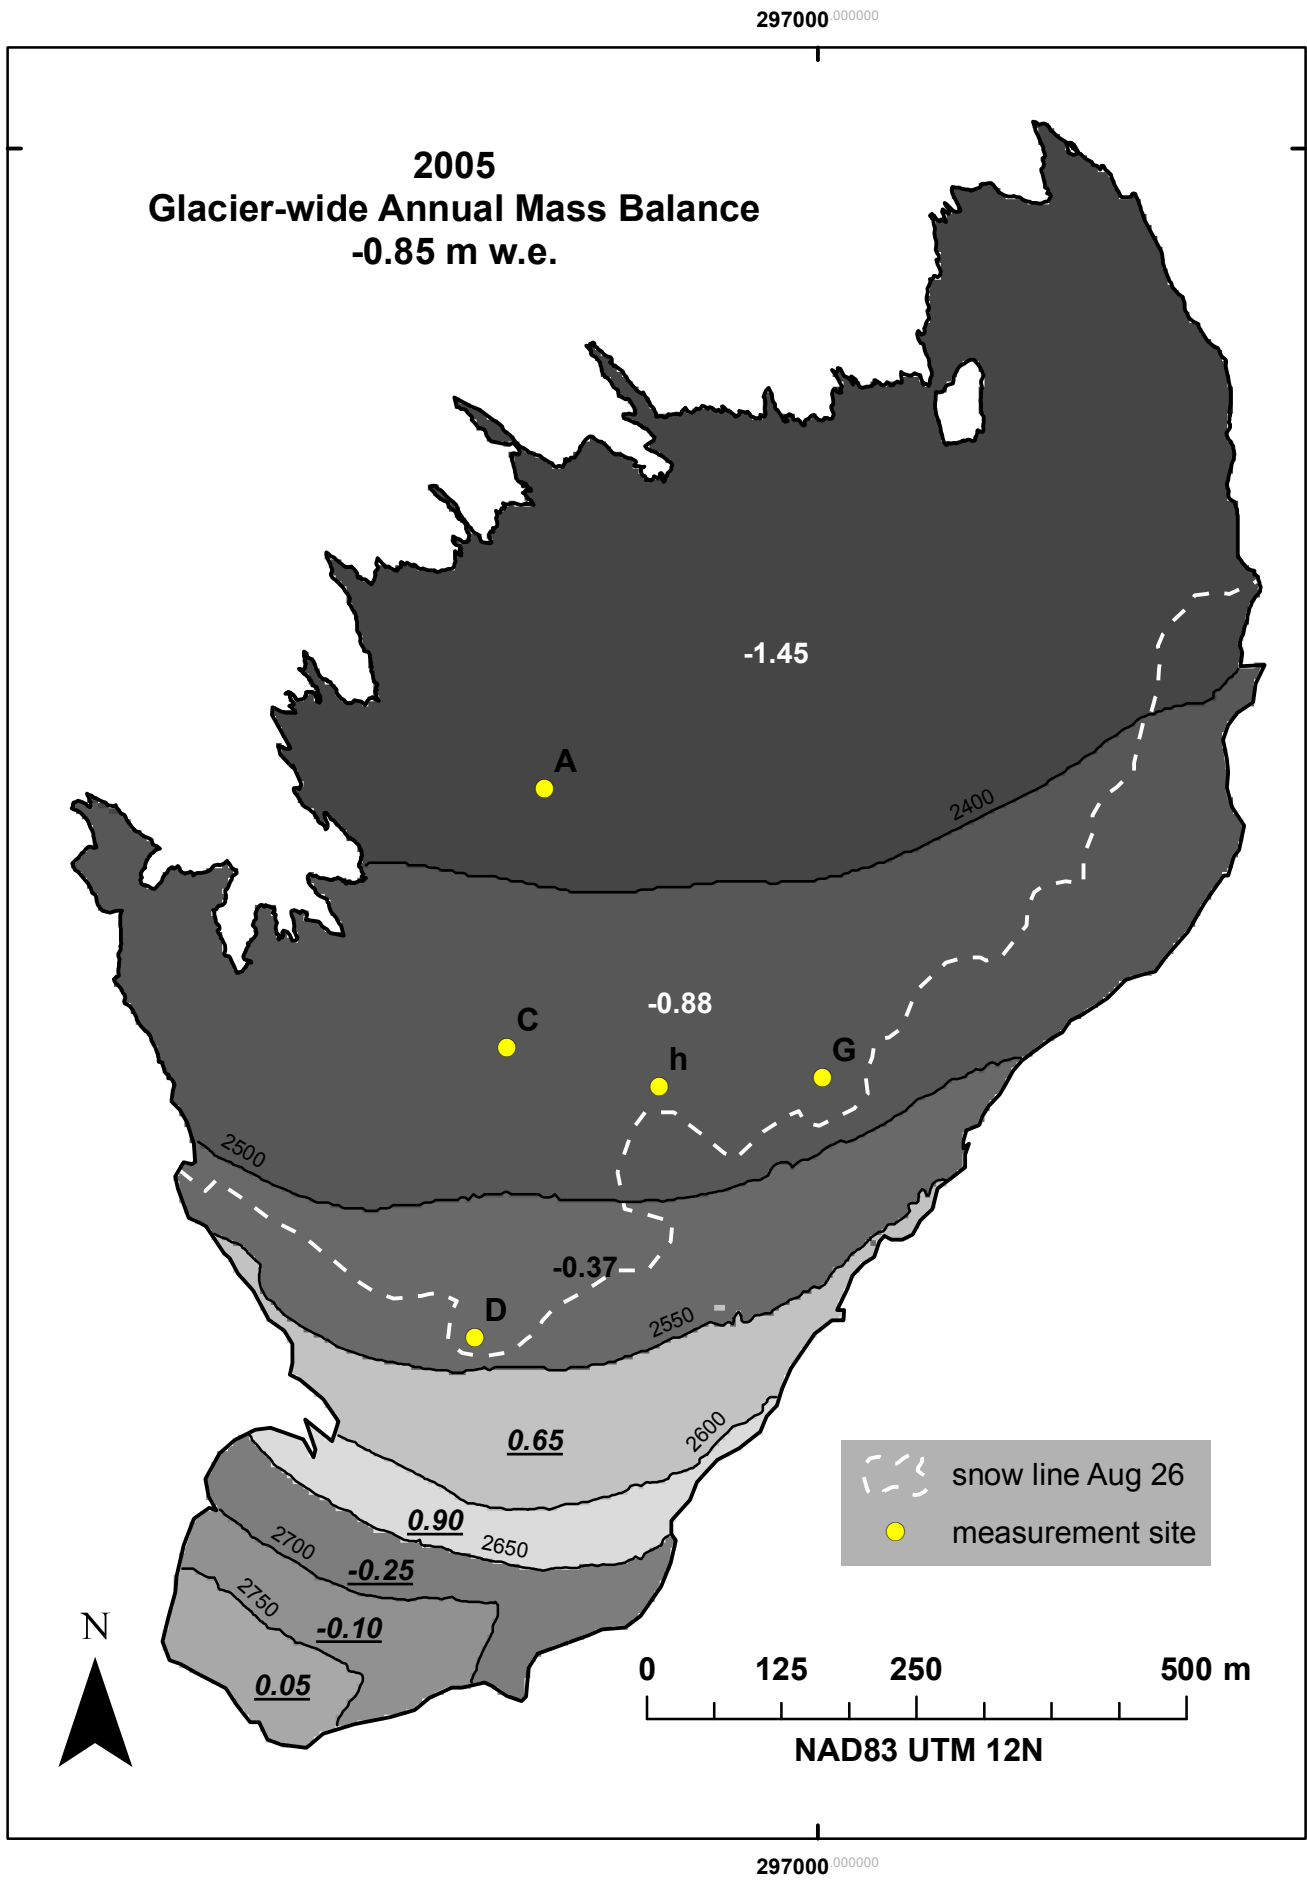

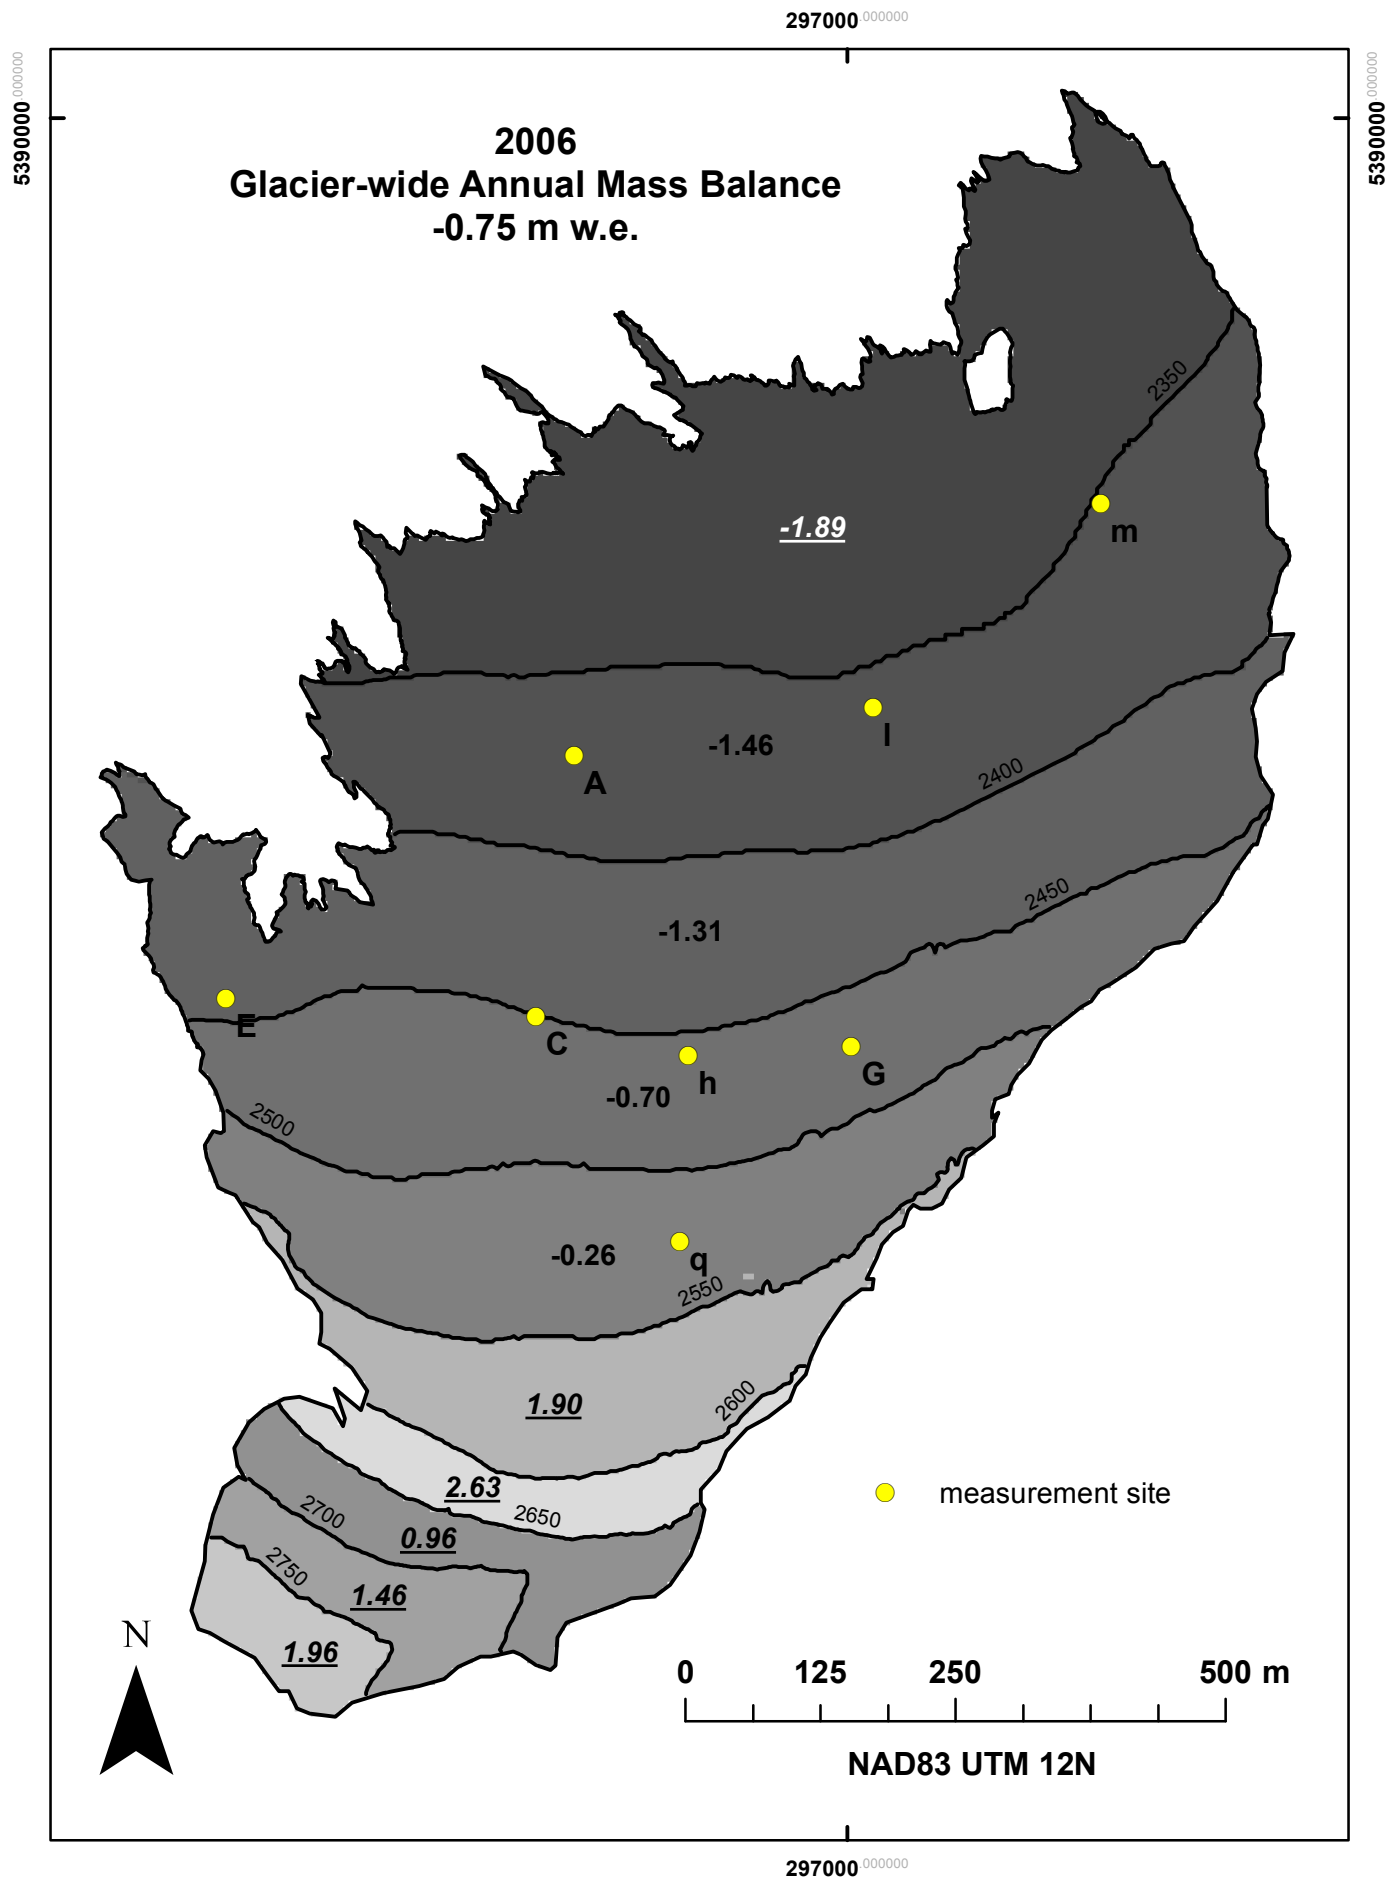



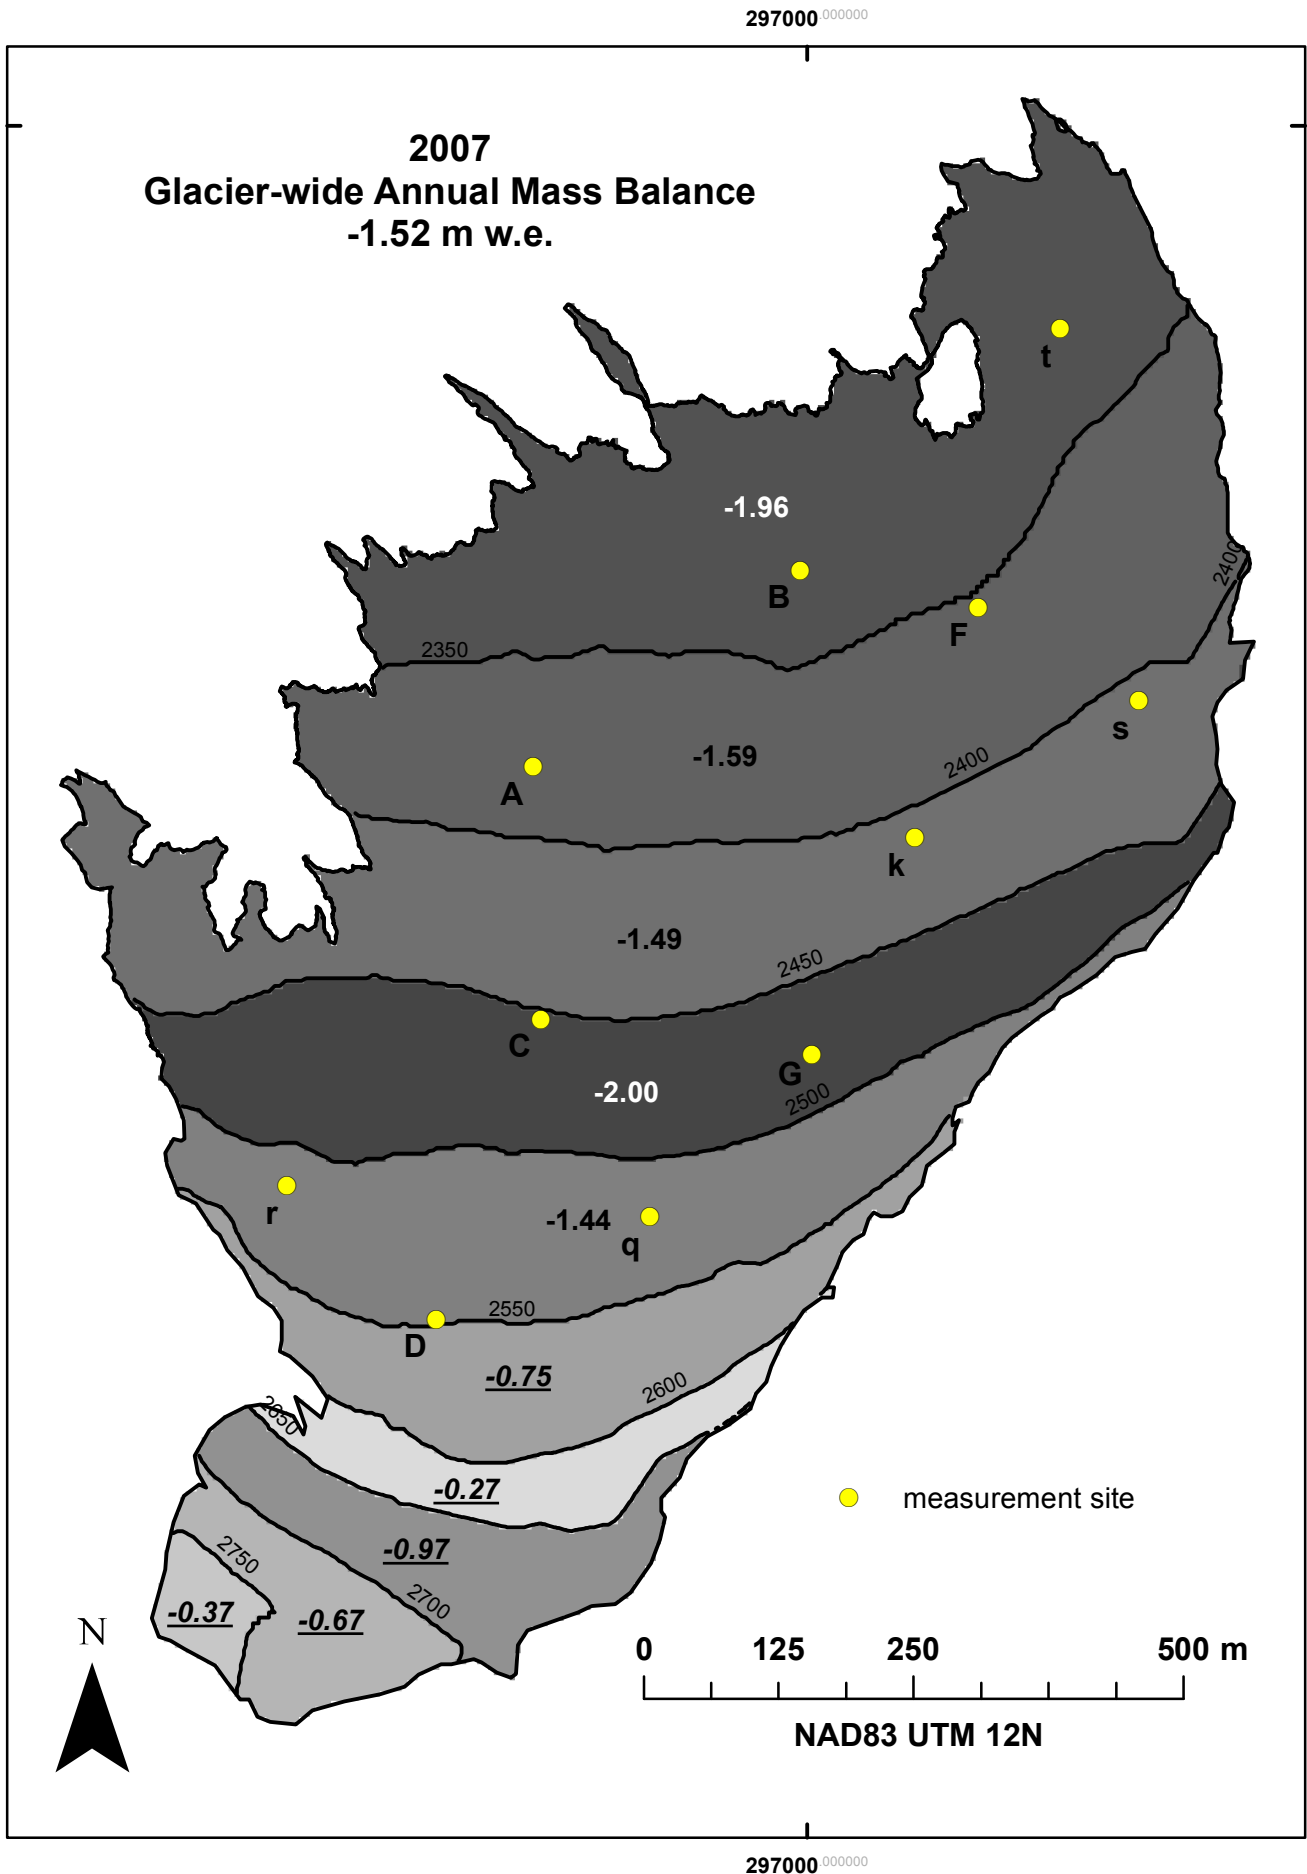

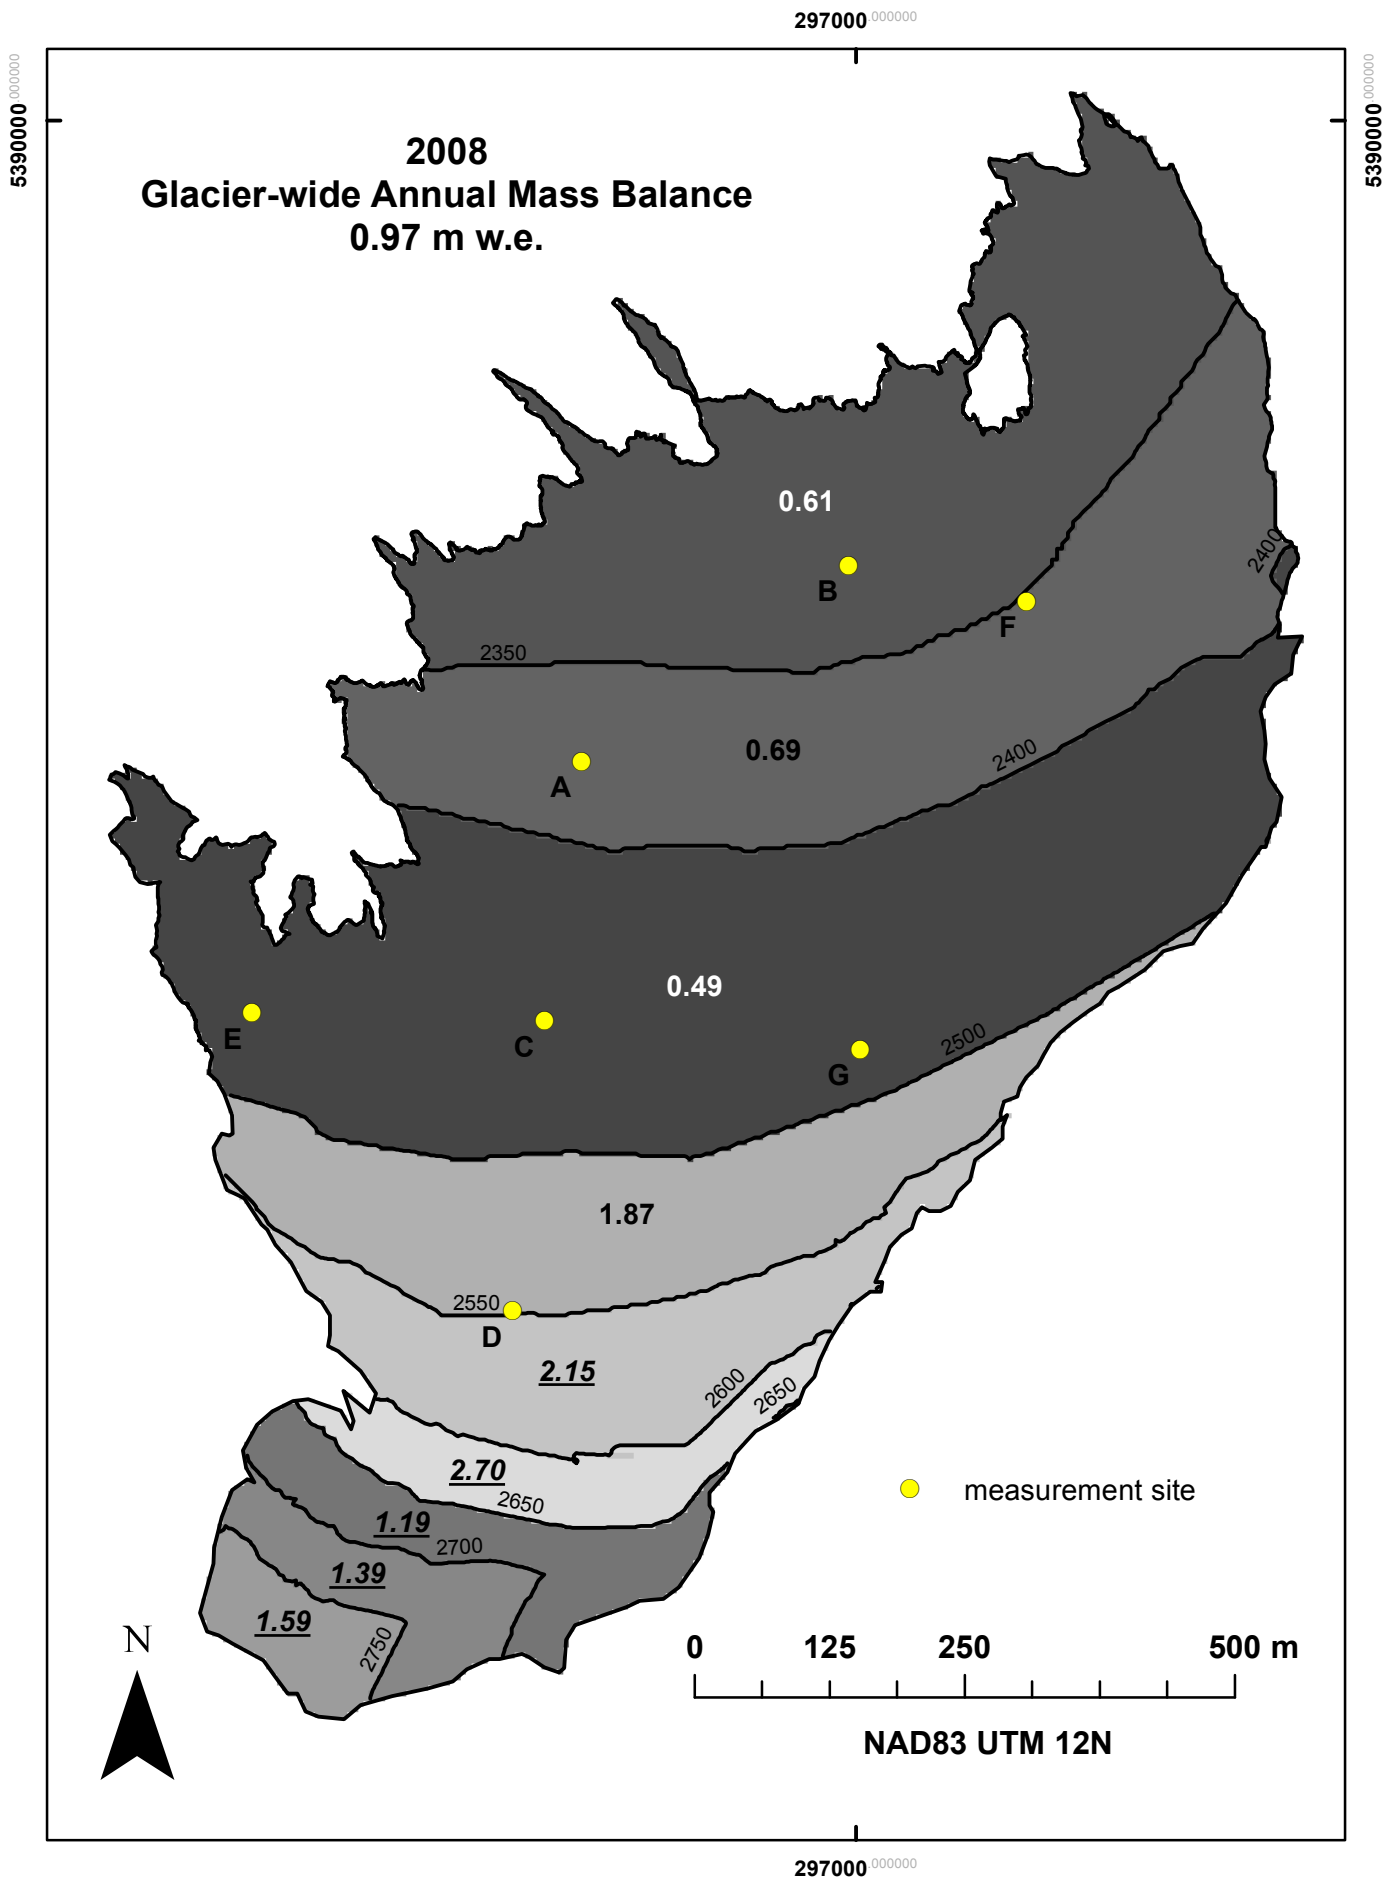

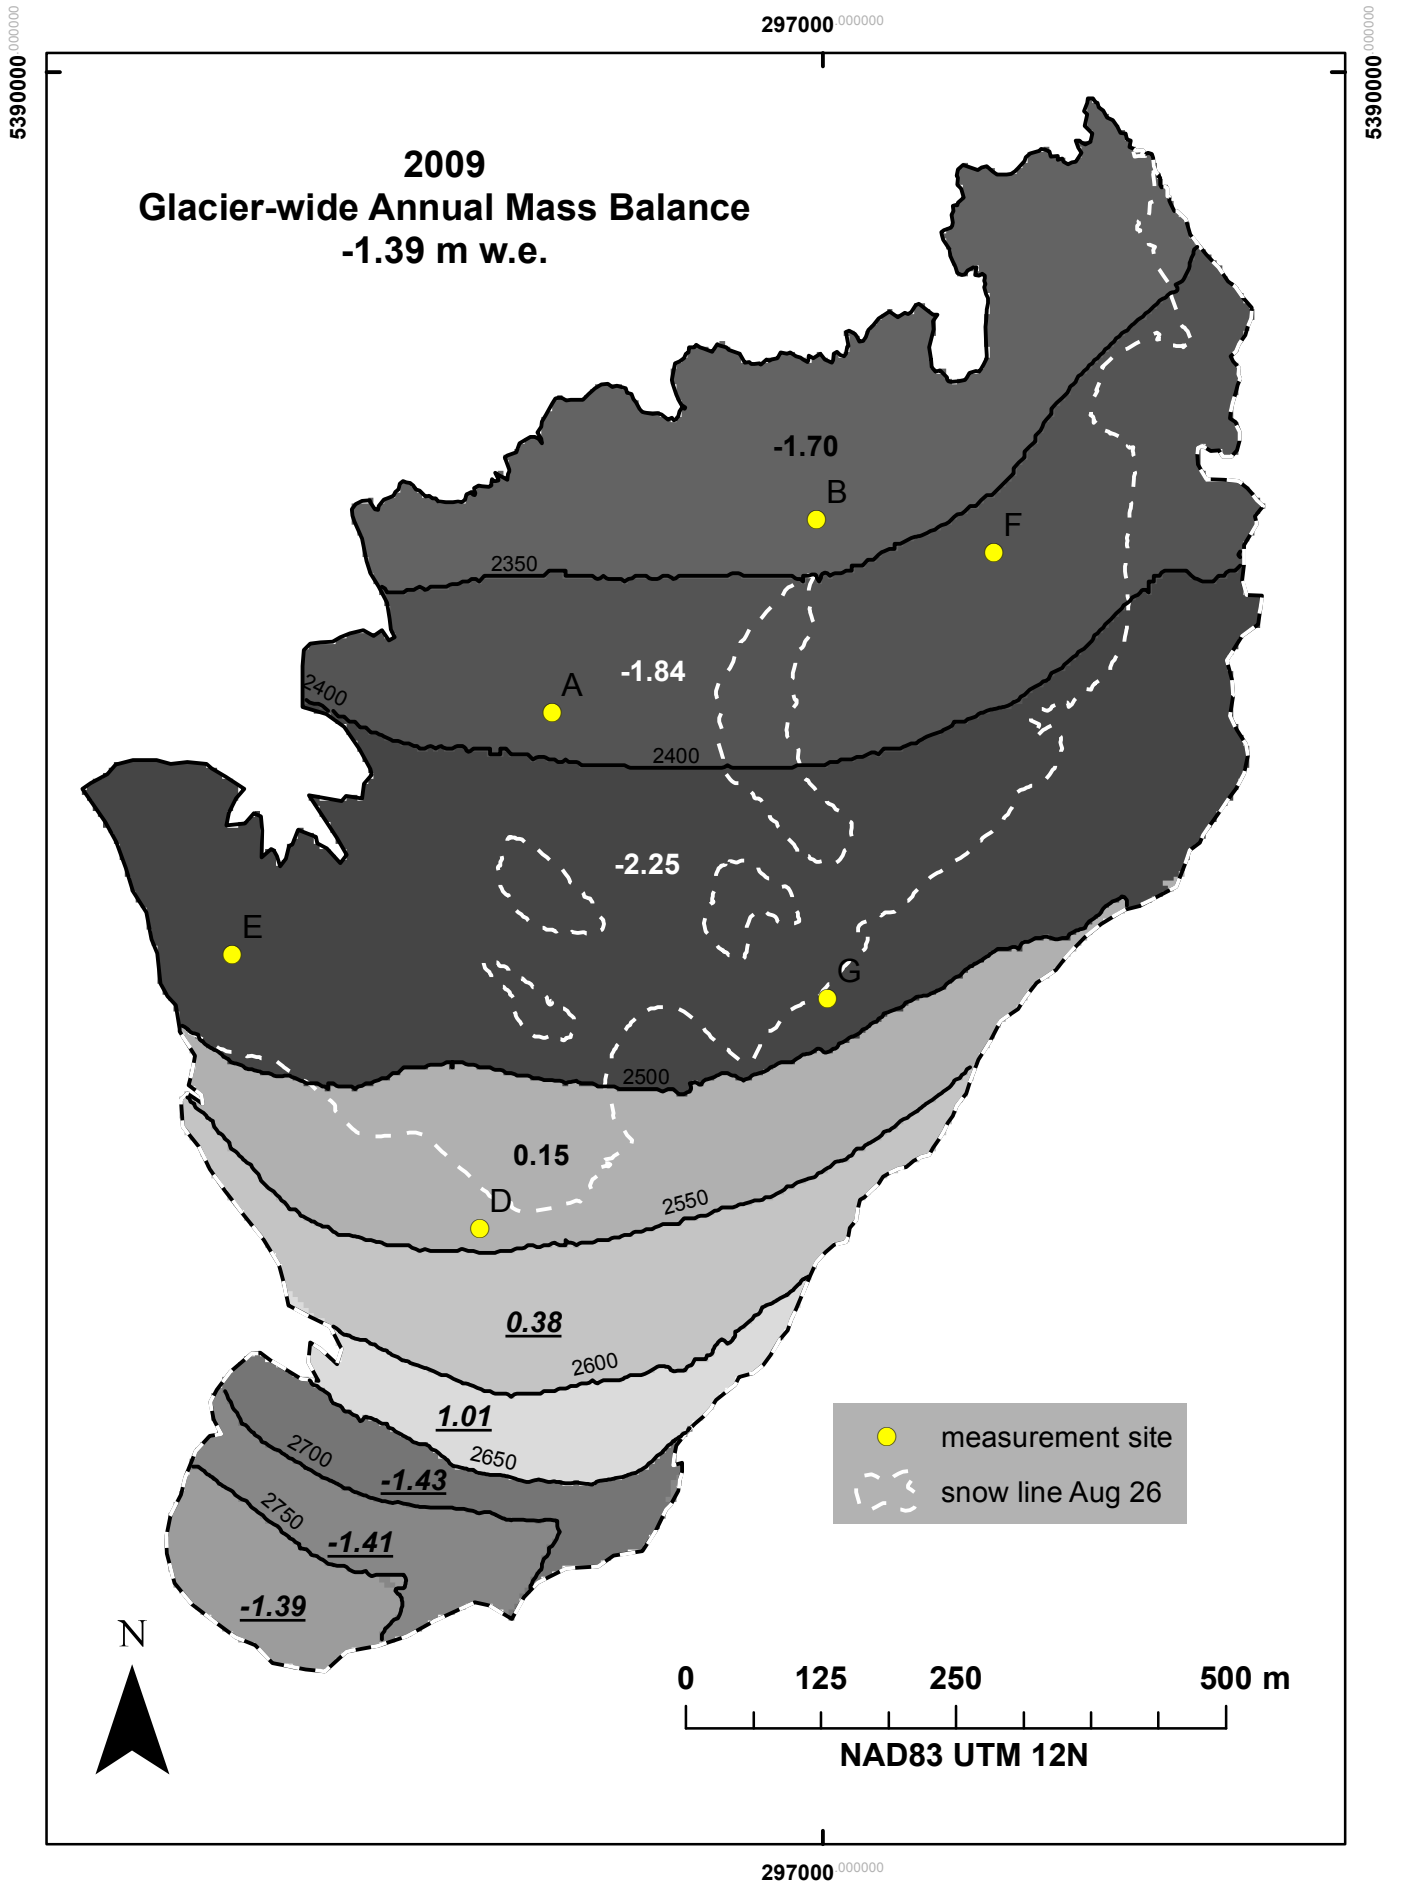

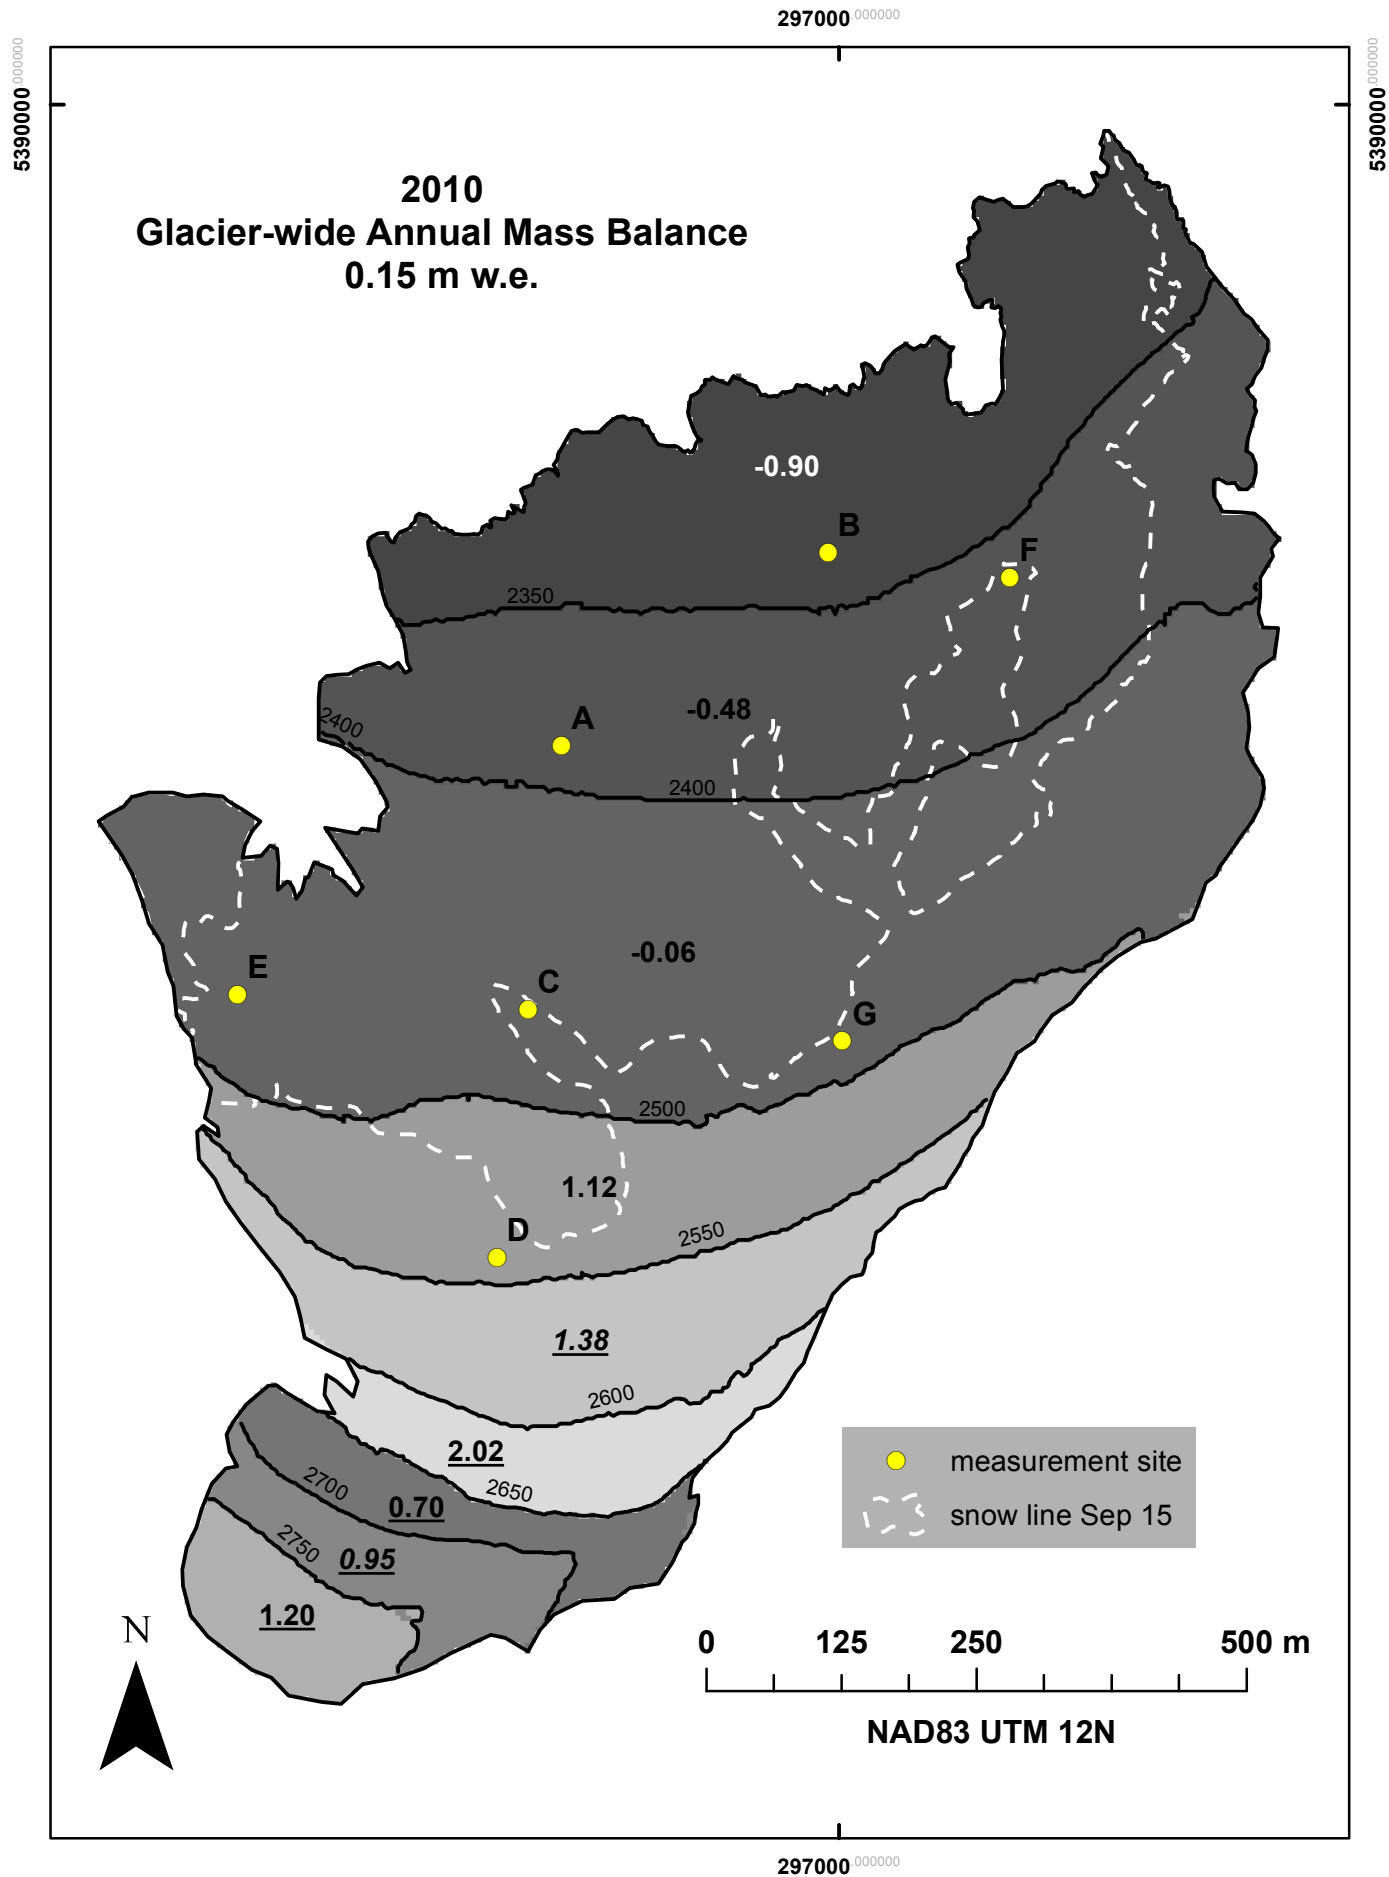

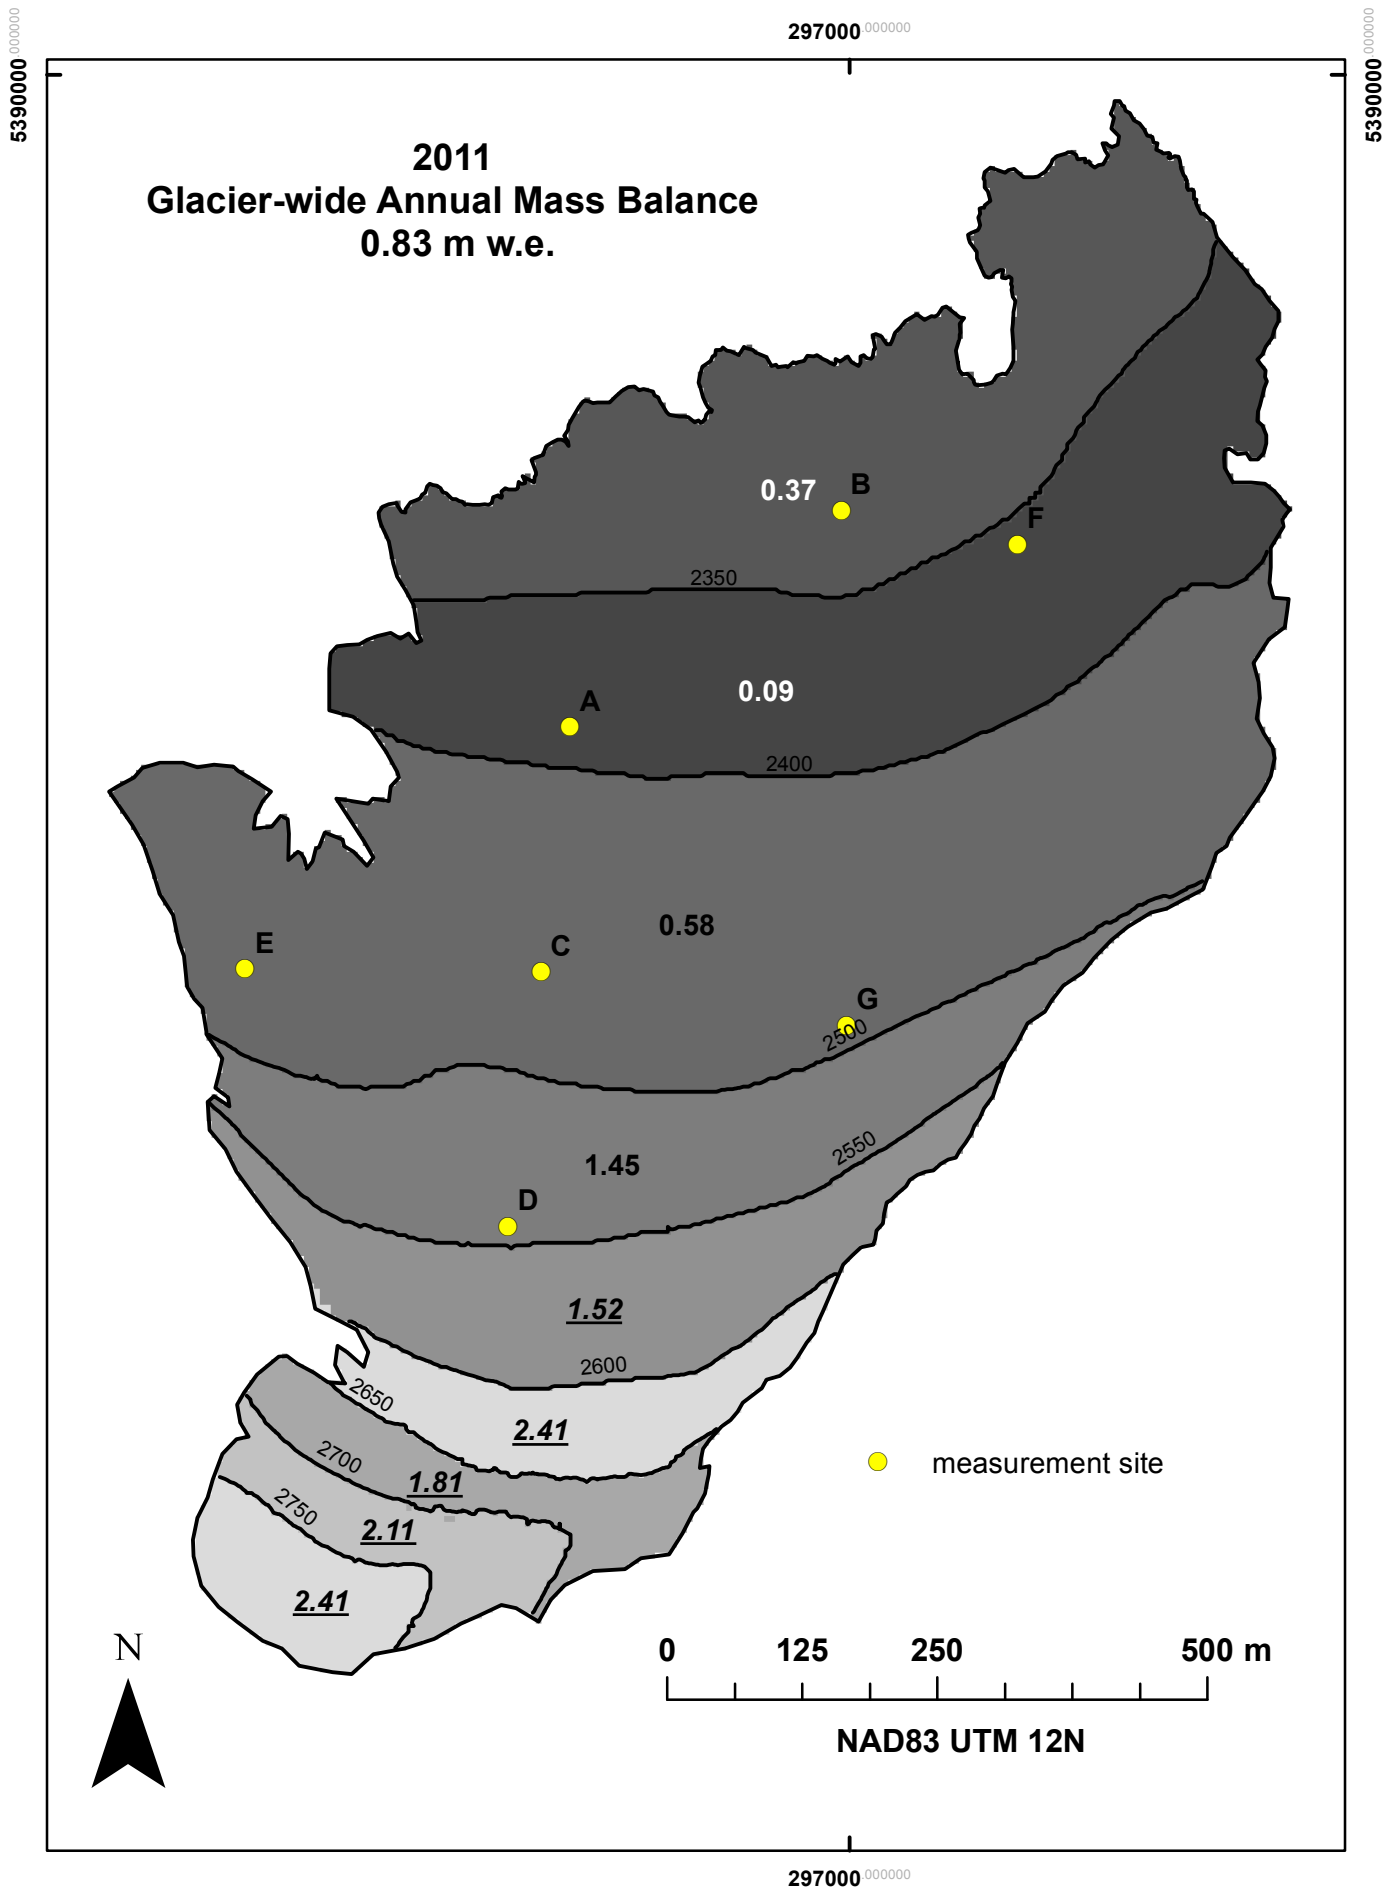

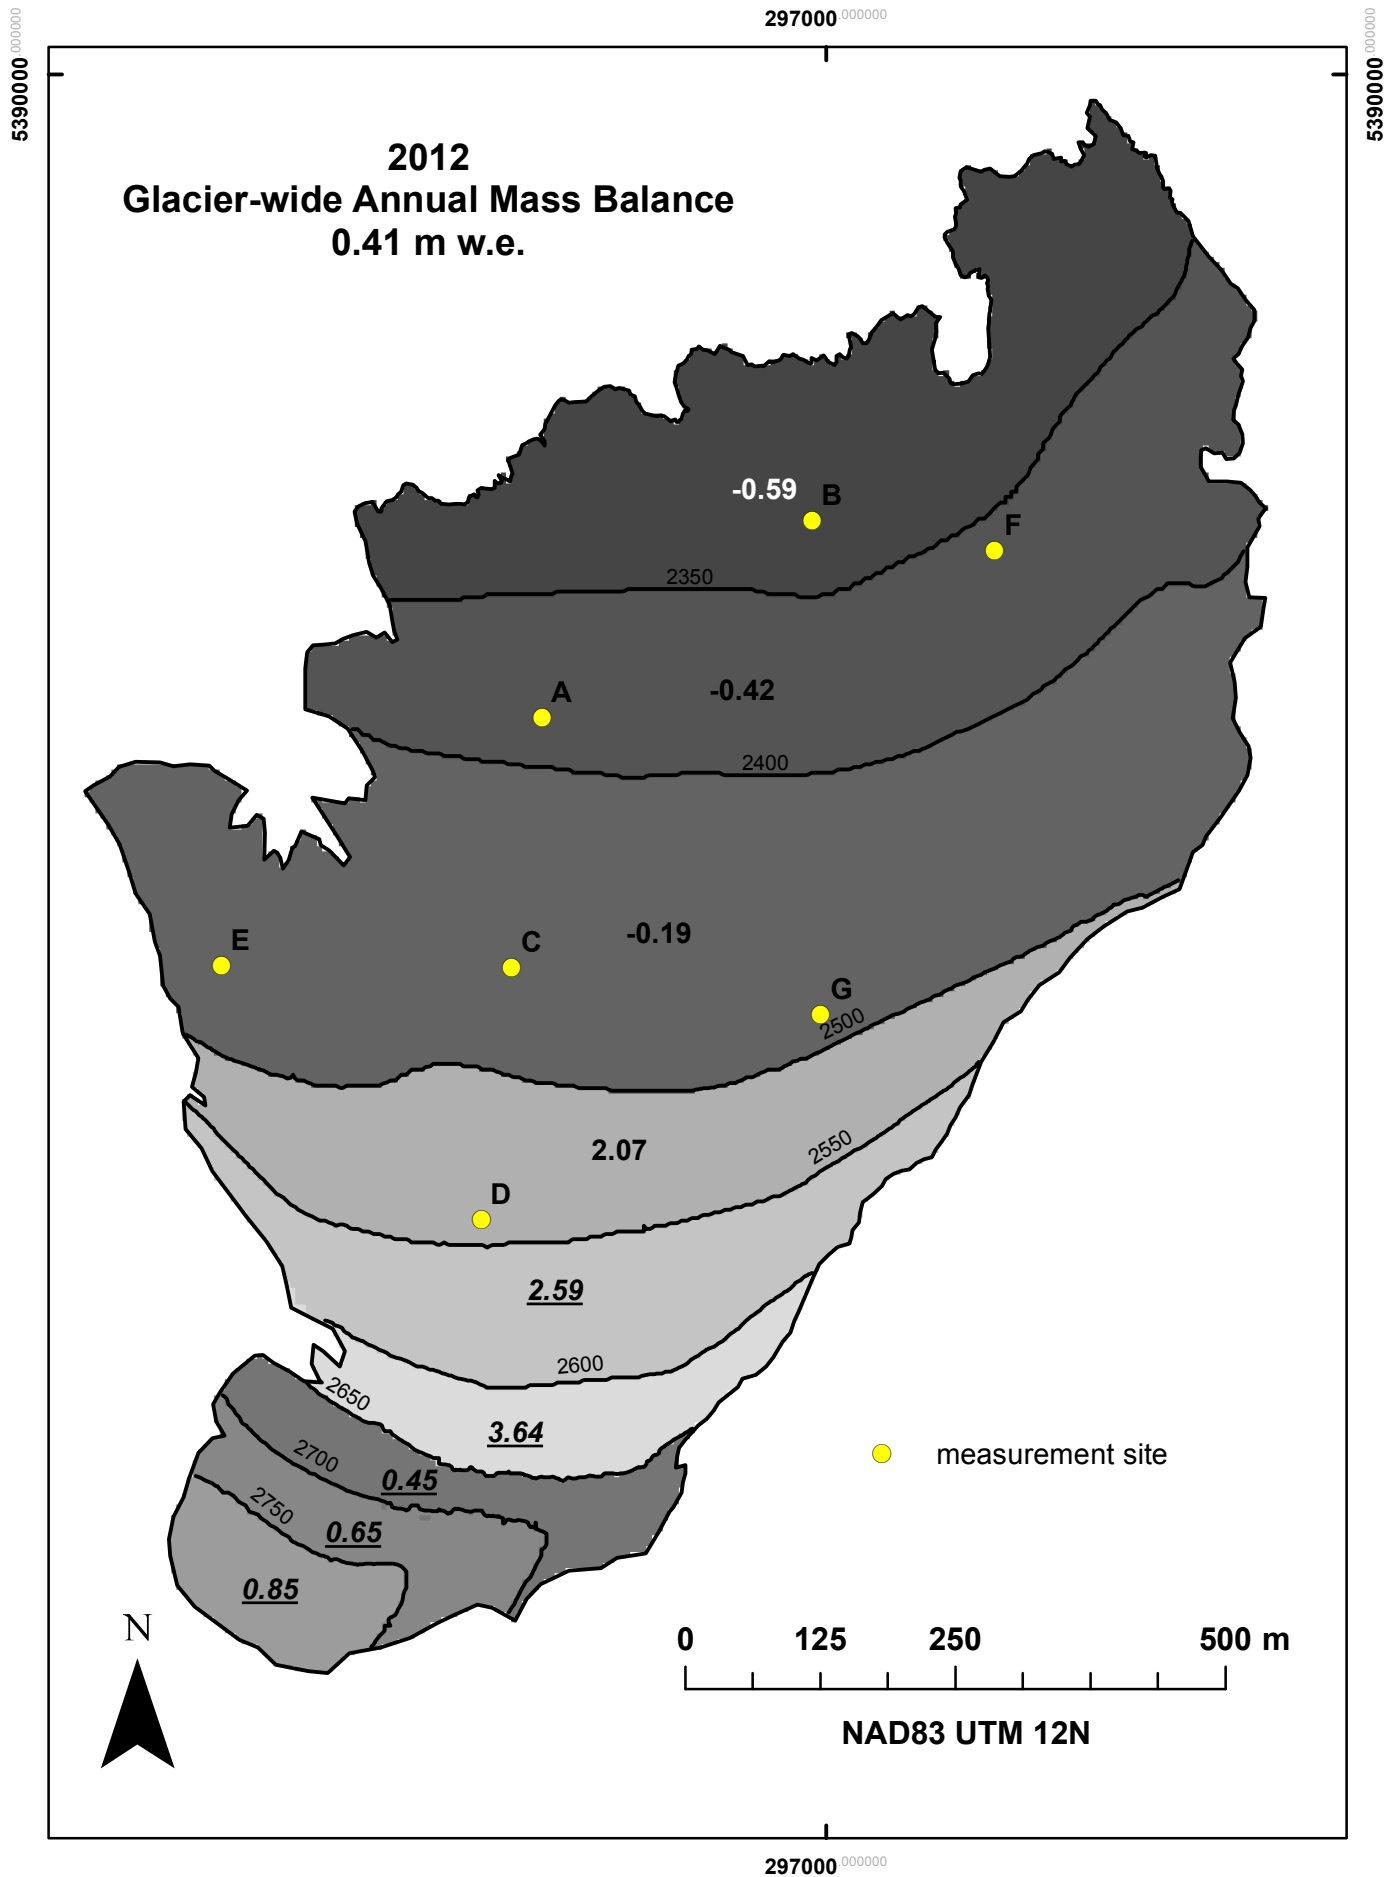

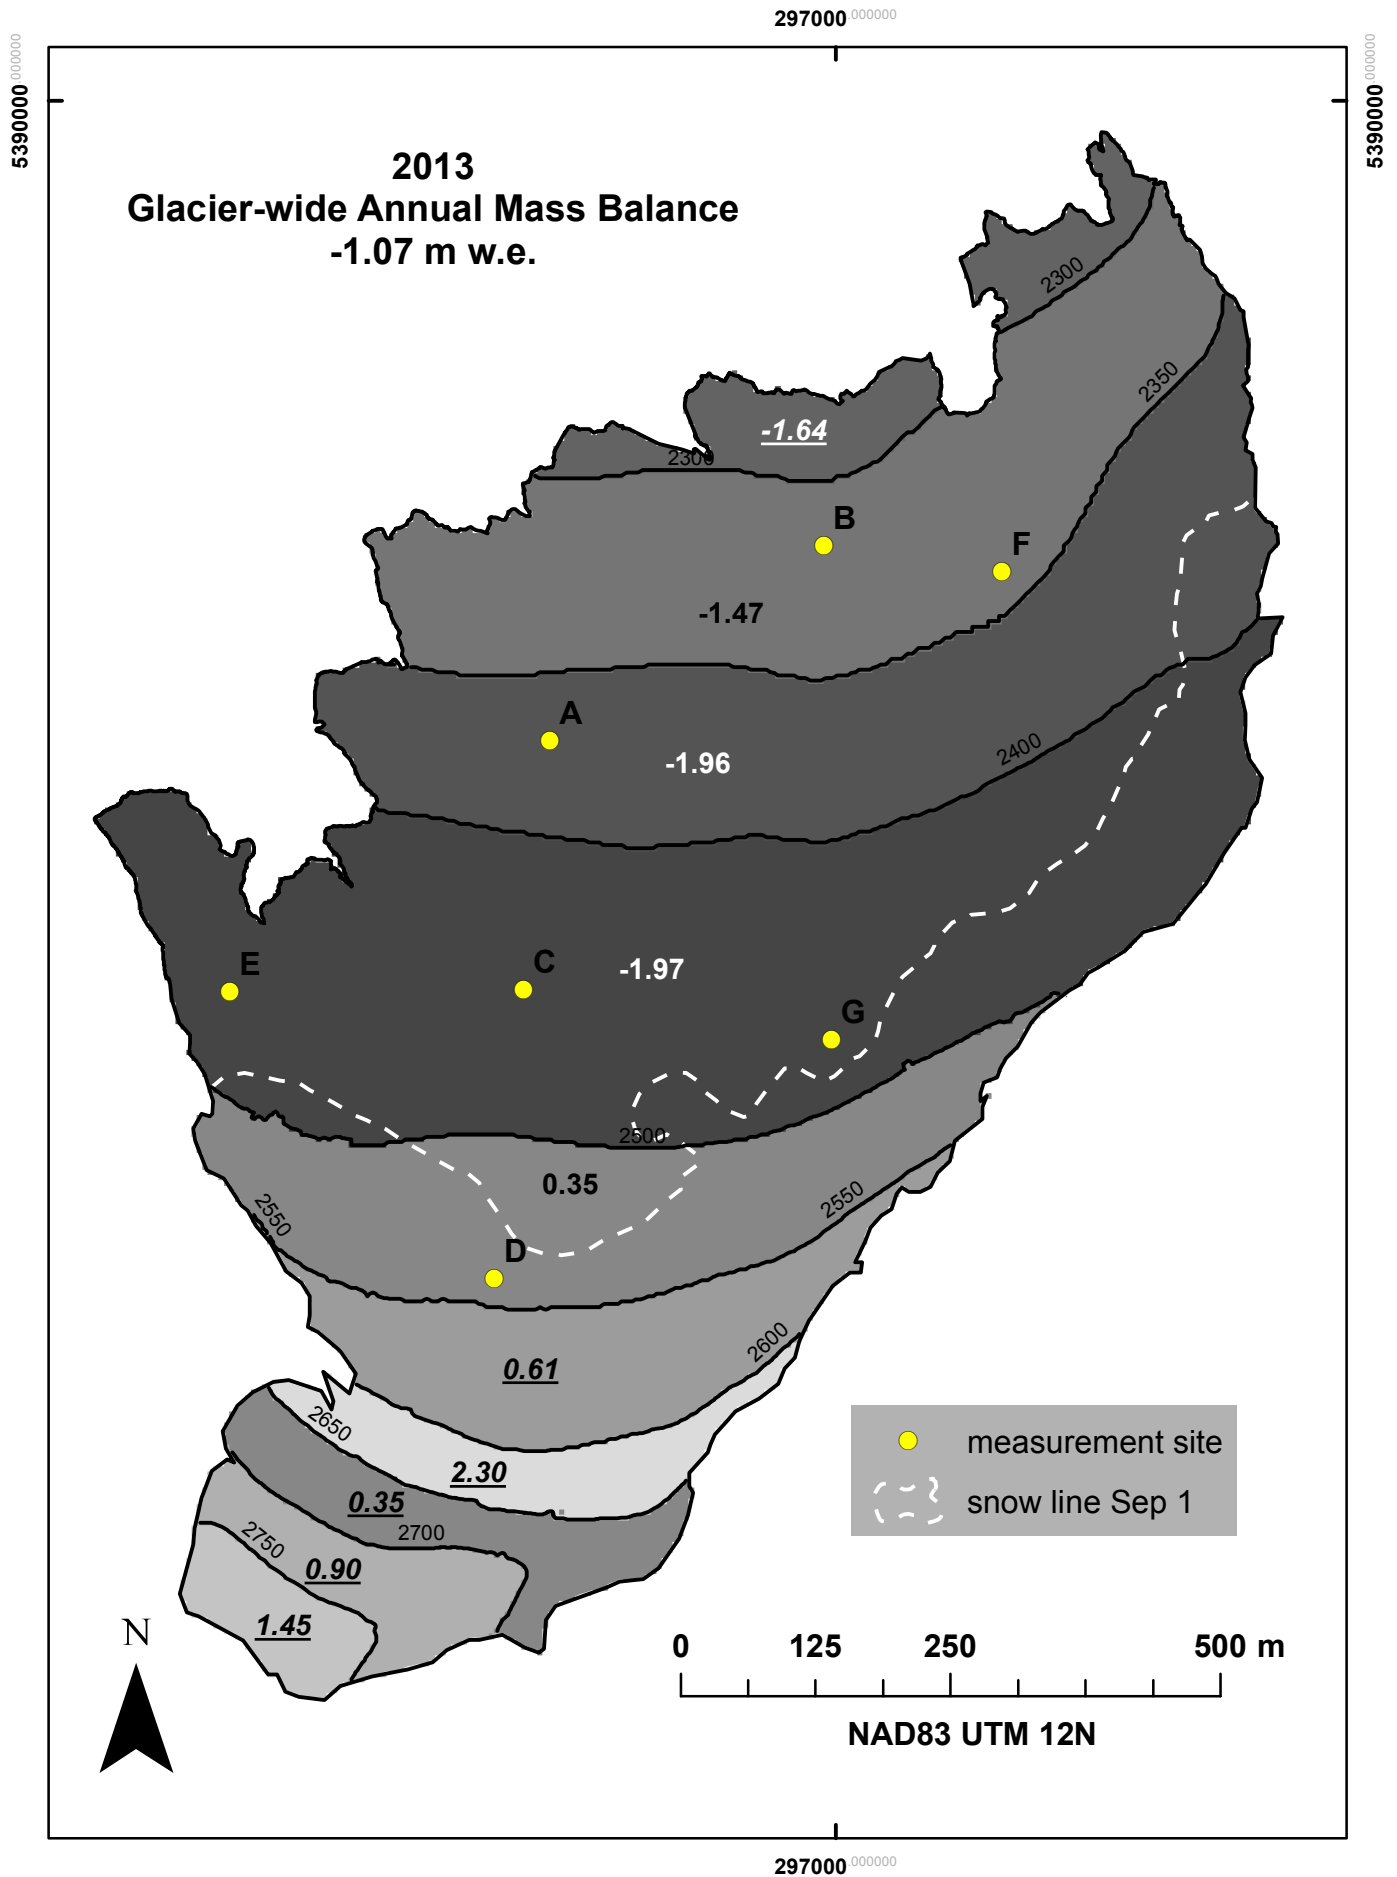

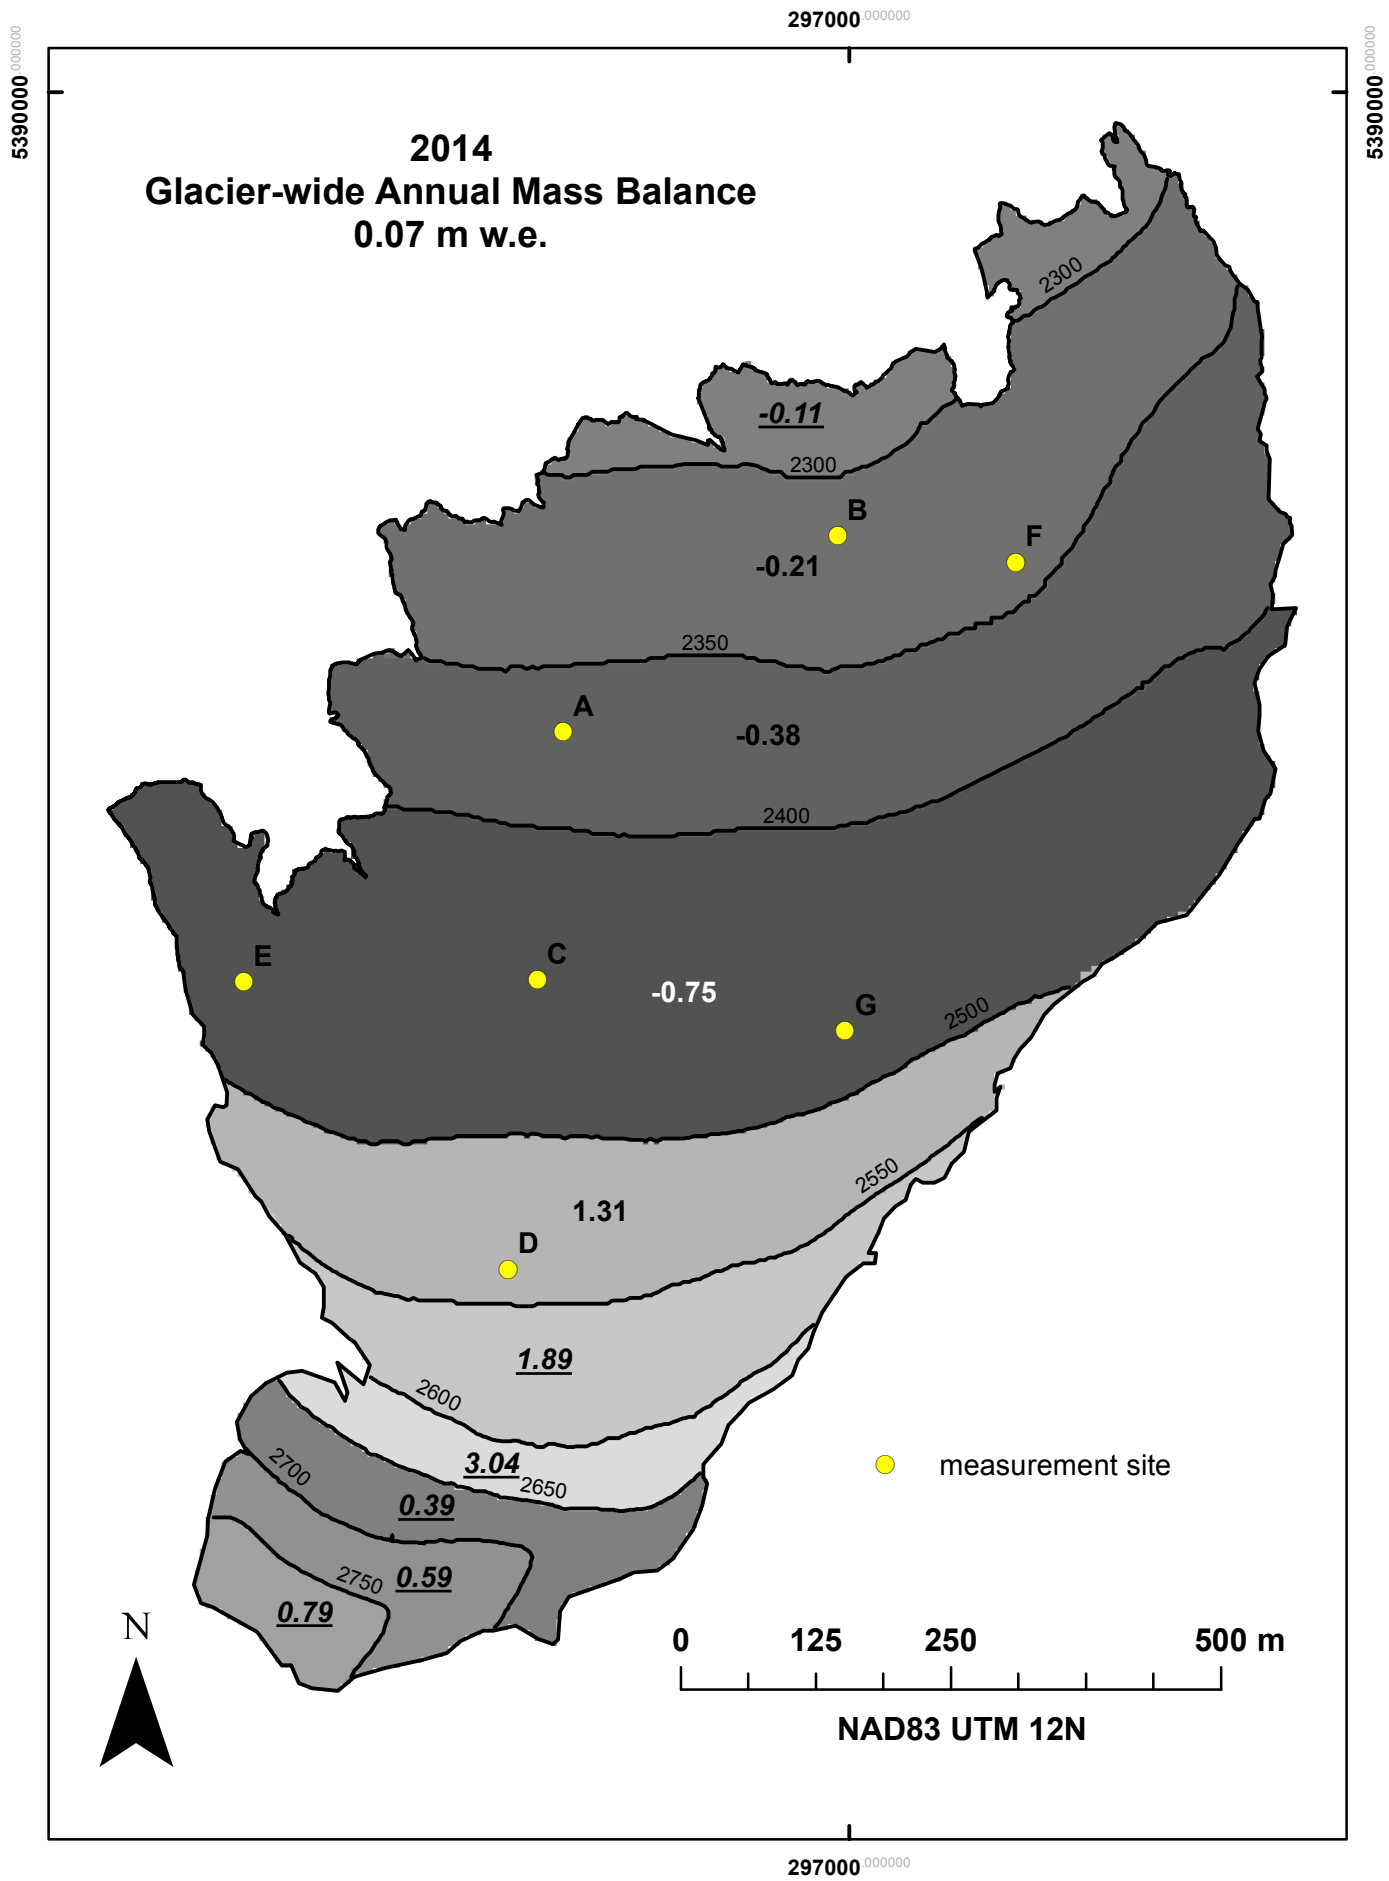



297000 000000

**2015**  
**Glacier-wide Annual Mass Balance**  
**-1.22 m w.e.**

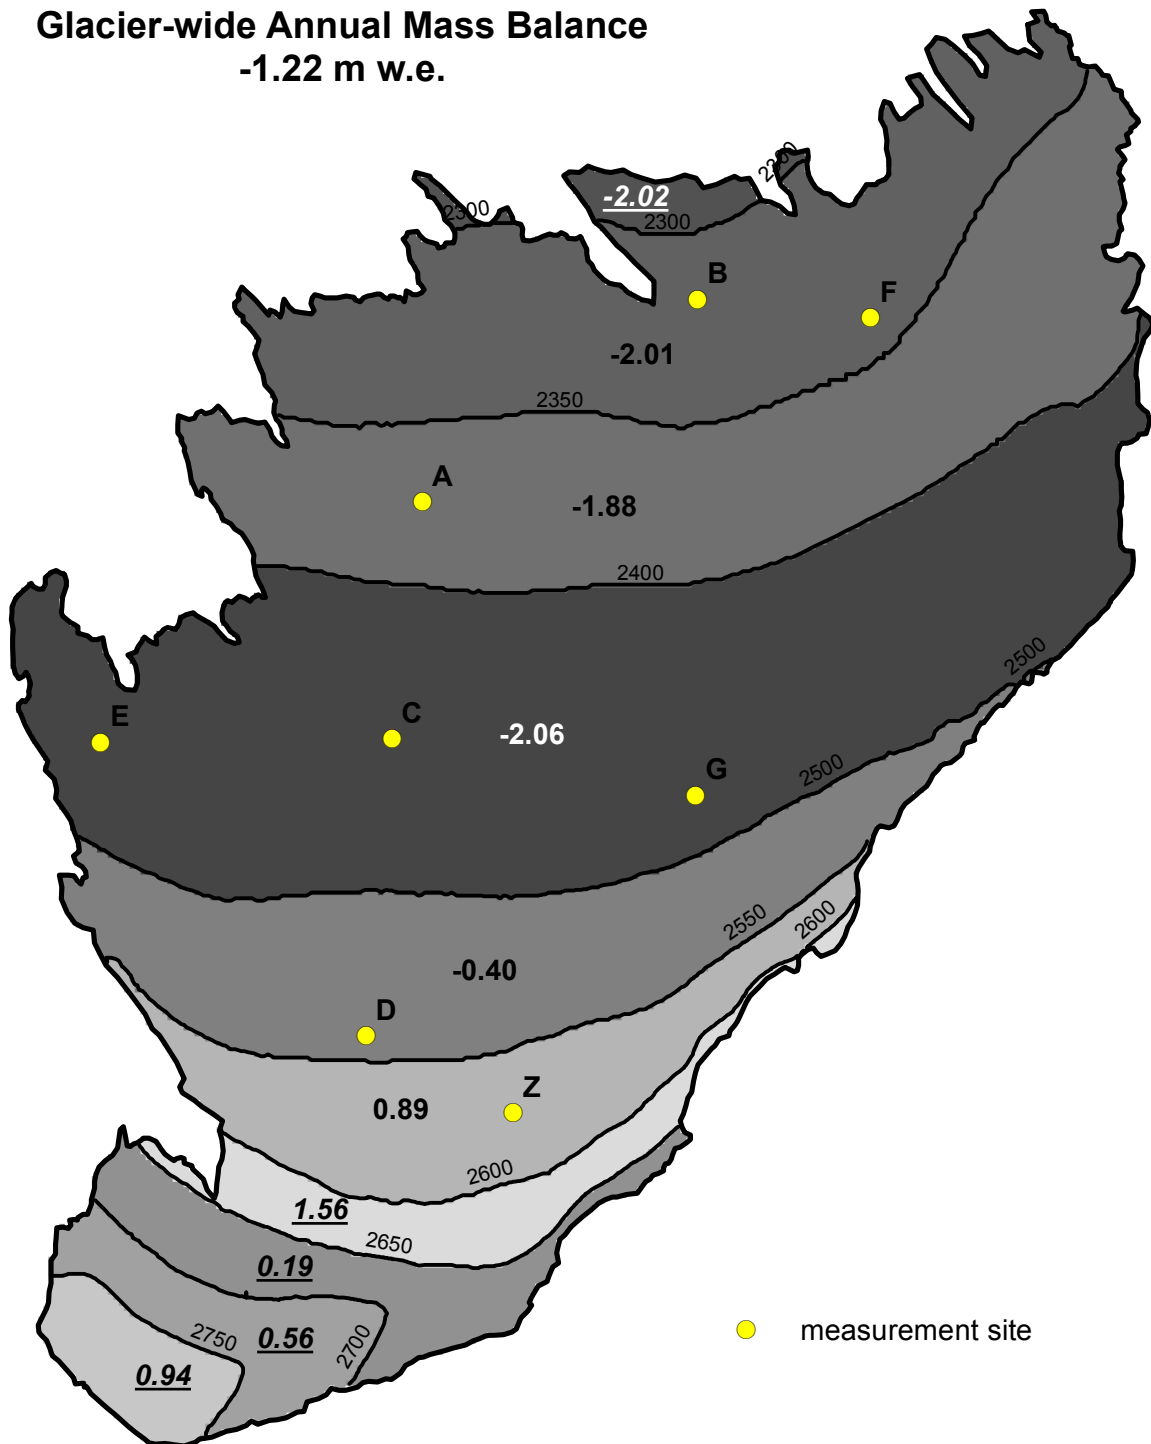

● measurement site

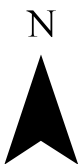

0 125 250 500 m

NAD 83 UTM 12N

297000 000000
